# Supplementary material for: Integration of RNA Editing with Multiomics Data Improves Machine Learning Models for Predicting Drug Responses in Breast Cancer Patients
Source: Research Square preprint supplement (doi:10.21203/rs.3.rs-5604105/v1), 2024-12-17
Supplement: Supplementary file 1 [file 1053f5c291273f86b6e264fb.xlsx]

## Sheet: Index
INDEX
Table S1: Results of differential expression analysis between responders and non-responders to therapy.
Table S2: Results of differential RNA editing site analysis between responders and non-responders to therapy.
Table S3: Results of tumor mutation differences per gene between responders and non-responders to therapy.
Table S4: Results of tumor variant differences between responders and non-responders to therapy.

## Sheet: S1 DEG pvalue
	baseMean	log2FoldChange	lfcSE	stat	pvalue	padj
ENST00000682133.1	27.4057	-25.2341	1.57605	-16.011	1.07e-57	1.64e-52
ENST00000568950.5	22.5543	-24.0625	1.55689	-15.4555	6.93e-54	5.32e-49
ENST00000674993.1	28.6954	-25.2973	1.66213	-15.2198	2.61e-52	1.34e-47
ENST00000698877.1	17.1975	-24.6184	1.6672	-14.7664	2.41e-49	9.27e-45
ENST00000699189.1	12.4162	-24.1097	1.63493	-14.7466	3.24e-49	9.95e-45
ENST00000675336.1	10.1285	-23.898	1.77012	-13.5008	1.55e-41	3.96e-37
ENST00000504499.5	22.1455	-24.9651	1.86039	-13.4192	4.67e-41	1.02e-36
ENST00000469362.6	51.679	-26.1194	1.97359	-13.2345	5.55e-40	1.07e-35
ENST00000519141.5	86.9584	-26.4117	2.03263	-12.9939	1.33e-38	2.26e-34
ENST00000637994.1	10.9943	-24.0045	1.86291	-12.8855	5.43e-38	8.35e-34
ENST00000437293.5	75.4179	-26.5623	2.12729	-12.4864	8.86e-36	1.24e-31
ENST00000517426.5	69.301	-26.4191	2.12655	-12.4234	1.95e-35	2.5e-31
ENST00000514261.1	10.0522	-23.8098	1.96655	-12.1074	9.65e-34	1.14e-29
ENST00000436730.7	28.687	-24.2233	2.00776	-12.0649	1.62e-33	1.78e-29
ENST00000643877.1	31.7737	-25.4539	2.14397	-11.8724	1.65e-32	1.69e-28
ENST00000645425.1	25.6262	-24.7906	2.10953	-11.7517	6.92e-32	6.65e-28
ENST00000681239.1	55.5177	-26.0697	2.22048	-11.7406	7.89e-32	7.13e-28
ENST00000347470.8	40.7855	-25.0477	2.16829	-11.5518	7.22e-31	6.17e-27
ENST00000512756.5	109.05	-26.2066	2.30794	-11.355	7e-30	5.66e-26
ENST00000505523.1	15.031	-24.4362	2.16975	-11.2622	2.02e-29	1.55e-25
ENST00000707116.1	18.4158	-24.7039	2.21184	-11.169	5.79e-29	4.04e-25
ENST00000369658.5	35.9832	-25.6255	2.29393	-11.171	5.66e-29	4.04e-25
ENST00000678070.1	126.259	-27.3192	2.46023	-11.1043	1.2e-28	7.99e-25
ENST00000327397.8	13.7777	-23.8257	2.16705	-10.9946	4.06e-28	2.6e-24
ENST00000553942.5	33.3931	-24.8412	2.28177	-10.8868	1.33e-27	8.19e-24
ENST00000699754.1	11.2333	-24.0312	2.27873	-10.5459	5.31e-26	3.14e-22
ENST00000558379.5	13.8232	-24.3144	2.30713	-10.5388	5.72e-26	3.26e-22
ENST00000524979.1	12.6952	-24.1916	2.29832	-10.5258	6.57e-26	3.61e-22
ENST00000503732.1	18.4803	-24.6948	2.35626	-10.4805	1.06e-25	5.63e-22
ENST00000376140.4	32.2084	-25.452	2.43815	-10.4391	1.64e-25	8.42e-22
ENST00000608319.1	35.8392	-25.6169	2.457	-10.4261	1.88e-25	9.34e-22
ENST00000493643.3	43.1485	-25.8728	2.48319	-10.4192	2.03e-25	9.73e-22
ENST00000642007.2	56.7936	-26.243	2.52156	-10.4075	2.29e-25	1.07e-21
ENST00000432607.2	92.8724	-6.38262	0.645998	-9.88024	5.07e-23	2.29e-19
ENST00000641596.1	2064.3	-4.10641	0.41747	-9.83644	7.84e-23	3.44e-19
ENST00000685765.1	16.7327	-24.5758	2.5223	-9.74341	1.97e-22	8.17e-19
ENST00000466186.2	14.1888	-24.3477	2.49838	-9.7454	1.93e-22	8.17e-19
ENST00000466153.5	27.7638	-25.2637	2.60632	-9.69328	3.22e-22	1.3e-18
ENST00000599198.5	1490.2	-6.04963	0.630282	-9.5983	8.13e-22	3.2e-18
ENST00000376971.4	104.663	-7.42432	0.797334	-9.31143	1.26e-20	4.85e-17
ENST00000673791.1	97.9892	-4.15033	0.457996	-9.06193	1.28e-19	4.8e-16
ENST00000527220.2	244.685	4.10739	0.456561	8.99637	2.33e-19	8.54e-16
ENST00000638678.1	12.2255	-24.1396	2.69163	-8.96839	3.01e-19	1.06e-15
ENST00000642898.1	112.944	-4.87438	0.543701	-8.96519	3.1e-19	1.06e-15
ENST00000699019.1	11.6317	-24.0836	2.68583	-8.96691	3.05e-19	1.06e-15
ENST00000519961.5	17.7041	-24.6608	2.75235	-8.95991	3.25e-19	1.09e-15
ENST00000697838.1	17.4063	-24.6373	2.75365	-8.94714	3.65e-19	1.19e-15
ENST00000687995.1	22.2261	-24.9487	2.79617	-8.92246	4.56e-19	1.46e-15
ENST00000520546.1	1014.04	-4.35489	0.488321	-8.9181	4.74e-19	1.49e-15
ENST00000307719.9	1821.02	-3.13164	0.351307	-8.91426	4.91e-19	1.51e-15
ENST00000436228.6	6.83143	24.4535	2.76361	8.84839	8.88e-19	2.68e-15
ENST00000662759.1	213.792	-4.12024	0.465895	-8.8437	9.26e-19	2.71e-15
ENST00000644563.1	215.291	-5.75545	0.650864	-8.84279	9.34e-19	2.71e-15
ENST00000680920.1	43.0325	27.0306	3.06308	8.82467	1.1e-18	3.12e-15
ENST00000656315.1	1602.26	-4.07952	0.472287	-8.63779	5.73e-18	1.6e-14
ENST00000681207.1	28.4477	26.4504	3.06312	8.6351	5.87e-18	1.61e-14
ENST00000511712.1	74.9742	-6.90035	0.801831	-8.60574	7.58e-18	2.04e-14
ENST00000701677.1	23.1953	26.1608	3.06315	8.54051	1.34e-17	3.54e-14
ENST00000354666.4	1510.09	-3.3042	0.391687	-8.4358	3.29e-17	8.57e-14
ENST00000518235.5	43.331	-25.7022	3.07262	-8.36494	6.01e-17	1.54e-13
ENST00000593298.5	341.931	-5.17701	0.623397	-8.30451	1e-16	2.52e-13
ENST00000616754.1	431.31	-3.30762	0.398555	-8.29903	1.05e-16	2.6e-13
ENST00000550389.5	32.0562	-25.4594	3.07264	-8.28584	1.17e-16	2.82e-13
ENST00000314980.5	610.838	4.40914	0.532084	8.28655	1.17e-16	2.82e-13
ENST00000473621.5	189.482	-6.80846	0.827002	-8.2327	1.83e-16	4.33e-13
ENST00000671607.1	113.221	-6.3648	0.774699	-8.21584	2.11e-16	4.91e-13
ENST00000524245.5	291.779	-6.02893	0.735768	-8.19406	2.53e-16	5.79e-13
ENST00000632685.1	29.4984	-25.1366	3.07265	-8.18074	2.82e-16	6.37e-13
ENST00000450156.6	11.0751	-24.0123	2.94772	-8.14604	3.76e-16	8.37e-13
ENST00000679894.1	49.5804	-24.9678	3.07261	-8.12593	4.44e-16	9.75e-13
ENST00000545197.3	290.561	-4.05462	0.499801	-8.11247	4.96e-16	1.07e-12
ENST00000382330.7	23.591	-24.9053	3.07268	-8.10541	5.26e-16	1.12e-12
ENST00000651626.1	8.8736	24.8167	3.06341	8.10103	5.45e-16	1.15e-12
ENST00000648668.1	20.4546	-24.8576	3.0727	-8.08983	5.97e-16	1.24e-12
ENST00000681541.1	19.9325	-24.821	3.0727	-8.07791	6.59e-16	1.35e-12
ENST00000640610.1	8.29807	24.7215	3.06344	8.06986	7.04e-16	1.42e-12
ENST00000268049.11	23.1826	-24.748	3.07268	-8.05421	8e-16	1.6e-12
ENST00000529292.5	7.92511	24.6614	3.06346	8.05017	8.27e-16	1.63e-12
ENST00000530945.1	921.518	2.08914	0.260146	8.03067	9.69e-16	1.89e-12
ENST00000673936.1	6.87521	24.461	3.06353	7.9846	1.41e-15	2.67e-12
ENST00000574616.2	16.1606	-24.5362	3.07274	-7.98511	1.4e-15	2.67e-12
ENST00000481224.5	13.8087	24.4393	3.06326	7.97821	1.48e-15	2.78e-12
ENST00000506087.5	15.884	-24.5063	3.07274	-7.97539	1.52e-15	2.81e-12
ENST00000679790.1	6.58145	24.3998	3.06355	7.96456	1.66e-15	3.03e-12
ENST00000309546.8	678.252	2.62844	0.330351	7.95651	1.77e-15	3.2e-12
ENST00000321253.7	150.244	-2.78035	0.350463	-7.93336	2.13e-15	3.81e-12
ENST00000224756.12	14.3717	-24.3683	3.07276	-7.93043	2.18e-15	3.86e-12
ENST00000689832.1	13.6458	-24.2893	3.07278	-7.90467	2.69e-15	4.69e-12
ENST00000456306.2	5.71717	24.1996	3.06364	7.89898	2.81e-15	4.85e-12
ENST00000523908.5	15.0975	-24.2425	3.07275	-7.8895	3.03e-15	5.18e-12
ENST00000296533.3	7389.34	-3.79693	0.481511	-7.88545	3.13e-15	5.29e-12
ENST00000478451.1	12.6584	-24.2003	3.07279	-7.87566	3.39e-15	5.66e-12
ENST00000381000.8	9.52009	24.0618	3.06338	7.85468	4.01e-15	6.62e-12
ENST00000225171.7	1319.73	-2.91146	0.370853	-7.85069	4.14e-15	6.73e-12
ENST00000582539.5	11.9276	-24.1215	3.07281	-7.84997	4.16e-15	6.73e-12
ENST00000696912.1	11.6545	-24.0919	3.07282	-7.84032	4.49e-15	7.19e-12
ENST00000345063.8	716.669	-3.04329	0.388637	-7.83067	4.85e-15	7.69e-12
ENST00000675387.1	11.335	-24.0471	3.07282	-7.82573	5.05e-15	7.91e-12
ENST00000674590.1	11.1036	-24.0127	3.07283	-7.81453	5.52e-15	8.56e-12
ENST00000673841.1	4.95536	23.898	3.06374	7.80028	6.18e-15	9.49e-12
ENST00000438313.6	10.5112	-23.9446	3.07285	-7.79233	6.58e-15	1e-11
ENST00000495380.7	261.427	-3.64598	0.468386	-7.78413	7.02e-15	1.06e-11
ENST00000282957.9	3942.31	-6.94845	0.893132	-7.77987	7.26e-15	1.08e-11
ENST00000269187.10	33264.6	-2.49423	0.321035	-7.76934	7.89e-15	1.17e-11
ENST00000544049.2	186.891	-6.17621	0.795615	-7.76281	8.31e-15	1.22e-11
ENST00000676647.1	10.8802	-23.8487	3.07284	-7.76112	8.42e-15	1.22e-11
ENST00000350221.4	511.062	-3.24749	0.419416	-7.74289	9.72e-15	1.4e-11
ENST00000252250.7	85.1807	4.34244	0.56151	7.7335	1.05e-14	1.49e-11
ENST00000618088.4	10.2606	-23.7603	3.07285	-7.73232	1.06e-14	1.49e-11
ENST00000704741.1	8.76948	-23.6979	3.07291	-7.7119	1.24e-14	1.73e-11
ENST00000291527.3	5978.61	-4.43959	0.578771	-7.67071	1.71e-14	2.37e-11
ENST00000561429.1	80.7311	-10.3189	1.35466	-7.61738	2.59e-14	3.55e-11
ENST00000302649.4	69.7776	-3.96978	0.521308	-7.61505	2.64e-14	3.58e-11
ENST00000372851.8	1656.87	-3.64361	0.479846	-7.59328	3.12e-14	4.17e-11
ENST00000243924.4	573.228	3.87283	0.509977	7.59413	3.1e-14	4.17e-11
ENST00000452488.1	21.1992	-5.55139	0.731475	-7.58932	3.22e-14	4.26e-11
ENST00000508123.1	83.7446	-3.29416	0.441741	-7.45722	8.84e-14	1.15e-10
ENST00000490247.1	128.905	-2.5246	0.338526	-7.45761	8.81e-14	1.15e-10
ENST00000367098.6	183.965	-5.47191	0.736035	-7.43431	1.05e-13	1.36e-10
ENST00000409836.3	209.858	1.80291	0.242688	7.42893	1.09e-13	1.4e-10
ENST00000255320.6	14.5636	-22.1414	3.00552	-7.36693	1.75e-13	2.22e-10
ENST00000600518.2	126.103	-5.50004	0.749707	-7.33626	2.2e-13	2.77e-10
ENST00000328619.10	109.735	3.38843	0.462716	7.32292	2.43e-13	3.03e-10
ENST00000602646.1	55.7387	-5.99132	0.8188	-7.3172	2.53e-13	3.14e-10
ENST00000371694.7	401.893	2.0078	0.274842	7.30529	2.77e-13	3.4e-10
ENST00000234392.3	194.896	1.94265	0.26655	7.28814	3.14e-13	3.83e-10
ENST00000530398.1	35.4756	3.65694	0.503212	7.2672	3.67e-13	4.44e-10
ENST00000502875.1	474.486	-2.91608	0.401517	-7.26266	3.8e-13	4.56e-10
ENST00000371610.7	1826.59	-2.08982	0.288003	-7.25623	3.98e-13	4.74e-10
ENST00000645586.1	153.64	-3.38092	0.466262	-7.25112	4.13e-13	4.89e-10
ENST00000390285.4	1045.33	3.1932	0.441772	7.22817	4.9e-13	5.74e-10
ENST00000326294.4	2613.44	2.29631	0.318286	7.21461	5.41e-13	6.3e-10
ENST00000601187.1	106.386	4.85423	0.673519	7.20728	5.71e-13	6.59e-10
ENST00000314412.7	189.314	1.99053	0.276296	7.20437	5.83e-13	6.69e-10
ENST00000403160.4	49.9682	-2.84301	0.395588	-7.1868	6.63e-13	7.55e-10
ENST00000519688.5	101.733	-3.9083	0.54434	-7.17989	6.98e-13	7.88e-10
ENST00000442267.3	14028.4	-1.96534	0.273892	-7.17559	7.2e-13	8.07e-10
ENST00000234798.5	52.1272	-2.95658	0.412489	-7.16765	7.63e-13	8.5e-10
ENST00000570682.2	23.1678	-6.67893	0.933315	-7.15614	8.3e-13	9.17e-10
ENST00000261652.7	166.447	2.78821	0.3902	7.14559	8.96e-13	9.84e-10
ENST00000474582.1	362.396	2.24561	0.315195	7.12451	1.04e-12	1.14e-09
ENST00000684483.1	438.549	3.28817	0.462887	7.10361	1.22e-12	1.32e-09
ENST00000402613.4	54.2533	-7.79785	1.09789	-7.10258	1.22e-12	1.32e-09
ENST00000478299.1	93.7641	2.76439	0.389771	7.09233	1.32e-12	1.41e-09
ENST00000590943.6	644.587	2.35754	0.333925	7.06009	1.66e-12	1.76e-09
ENST00000655778.1	23.8431	-4.37804	0.620541	-7.0552	1.72e-12	1.81e-09
ENST00000178638.8	9630.87	-2.38671	0.338641	-7.04791	1.82e-12	1.9e-09
ENST00000520271.5	1700.42	-2.86201	0.406243	-7.04506	1.85e-12	1.92e-09
ENST00000592052.1	446.138	2.47807	0.352896	7.02211	2.19e-12	2.25e-09
ENST00000423263.5	29.6894	-4.88224	0.696608	-7.00859	2.41e-12	2.47e-09
ENST00000686248.2	60.6854	-5.38693	0.769553	-7.00007	2.56e-12	2.6e-09
ENST00000377795.7	31396.1	2.26879	0.324162	6.99894	2.58e-12	2.61e-09
ENST00000438510.5	445.384	2.13682	0.305462	6.99536	2.65e-12	2.66e-09
ENST00000522940.5	315.091	-2.94651	0.422908	-6.96725	3.23e-12	3.22e-09
ENST00000566054.1	3.94006	-4.08862	0.587164	-6.96333	3.32e-12	3.29e-09
ENST00000448058.1	15.2508	2.35364	0.338189	6.95954	3.41e-12	3.36e-09
ENST00000498815.1	2029.83	2.96155	0.425797	6.95531	3.52e-12	3.44e-09
ENST00000636932.1	64.0471	-3.02942	0.435756	-6.9521	3.6e-12	3.5e-09
ENST00000215886.6	328.866	2.24743	0.323327	6.95097	3.63e-12	3.51e-09
ENST00000434330.1	47.869	-2.64261	0.380575	-6.94372	3.82e-12	3.67e-09
ENST00000481758.1	93.9295	2.27061	0.327326	6.93685	4.01e-12	3.83e-09
ENST00000473624.2	2597.71	-1.69172	0.244063	-6.93147	4.16e-12	3.95e-09
ENST00000496704.1	451.728	-2.39336	0.346283	-6.91156	4.79e-12	4.52e-09
ENST00000417424.1	95.8775	2.64965	0.384807	6.88566	5.75e-12	5.39e-09
ENST00000646641.1	1328.7	1.17757	0.171083	6.88307	5.86e-12	5.46e-09
ENST00000552588.5	175.663	8.26777	1.2015	6.88122	5.93e-12	5.49e-09
ENST00000437876.1	46.4623	-4.60152	0.669326	-6.87485	6.21e-12	5.71e-09
ENST00000356289.10	826.303	1.88629	0.274422	6.87368	6.26e-12	5.72e-09
ENST00000302555.10	439.12	-4.0621	0.591896	-6.86286	6.75e-12	6.1e-09
ENST00000589334.5	385.338	-3.4167	0.49782	-6.86331	6.73e-12	6.1e-09
ENST00000429360.6	1765.13	1.64439	0.240031	6.85076	7.35e-12	6.6e-09
ENST00000657488.1	313.279	-2.10126	0.306803	-6.8489	7.44e-12	6.65e-09
ENST00000392953.8	195.646	1.6647	0.243535	6.83557	8.17e-12	7.25e-09
ENST00000689186.1	8896.08	1.89649	0.277864	6.82524	8.78e-12	7.75e-09
ENST00000341074.10	48.8844	5.50837	0.807318	6.82304	8.91e-12	7.83e-09
ENST00000677962.1	145.06	-2.38281	0.349759	-6.81273	9.58e-12	8.31e-09
ENST00000599101.5	146.673	3.36671	0.494132	6.81338	9.53e-12	8.31e-09
ENST00000372387.1	140.089	-2.70737	0.397609	-6.80914	9.82e-12	8.48e-09
ENST00000246914.10	992.62	-2.67439	0.39382	-6.7909	1.11e-11	9.57e-09
ENST00000216341.9	525.569	2.38233	0.351058	6.78615	1.15e-11	9.83e-09
ENST00000481933.1	284.532	2.49115	0.367915	6.77099	1.28e-11	1.09e-08
ENST00000639952.1	137.797	-2.83381	0.419403	-6.75677	1.41e-11	1.19e-08
ENST00000368947.9	992.706	-1.96962	0.291618	-6.75413	1.44e-11	1.21e-08
ENST00000616880.1	102.167	2.70403	0.401045	6.74246	1.56e-11	1.3e-08
ENST00000503179.5	65.3731	-3.23717	0.480509	-6.73697	1.62e-11	1.34e-08
ENST00000258930.8	432.684	1.56992	0.23353	6.72259	1.79e-11	1.47e-08
ENST00000599274.2	42.647	1.94568	0.289616	6.71815	1.84e-11	1.51e-08
ENST00000674159.1	271.209	-1.64366	0.244872	-6.71233	1.92e-11	1.57e-08
ENST00000297323.12	2638.98	-2.24026	0.333878	-6.70983	1.95e-11	1.58e-08
ENST00000368452.7	606.612	-2.42612	0.362794	-6.68732	2.27e-11	1.84e-08
ENST00000306384.5	1995.83	1.33565	0.199937	6.68038	2.38e-11	1.91e-08
ENST00000541049.1	52.6997	2.11669	0.316851	6.68041	2.38e-11	1.91e-08
ENST00000245903.4	69.032	2.04004	0.305518	6.67732	2.43e-11	1.94e-08
ENST00000697731.1	1334.13	-3.75341	0.563192	-6.66454	2.65e-11	2.1e-08
ENST00000506581.6	329.084	3.8135	0.572273	6.66377	2.67e-11	2.1e-08
ENST00000521326.2	78.6699	-1.91409	0.28746	-6.65864	2.76e-11	2.17e-08
ENST00000702281.1	450.132	-2.81627	0.423149	-6.65551	2.82e-11	2.2e-08
ENST00000647374.2	1325.22	-2.85574	0.429652	-6.64663	3e-11	2.33e-08
ENST00000658344.1	77.1264	-2.46399	0.370829	-6.64454	3.04e-11	2.35e-08
ENST00000369849.9	53.6431	3.03003	0.456427	6.63858	3.17e-11	2.43e-08
ENST00000390551.6	21765.7	2.79059	0.420502	6.63633	3.22e-11	2.46e-08
ENST00000579458.1	147.744	-3.25513	0.491269	-6.62596	3.45e-11	2.62e-08
ENST00000341584.4	77.1317	-4.64768	0.702105	-6.61963	3.6e-11	2.73e-08
ENST00000607084.1	15.5459	-2.63823	0.39883	-6.61492	3.72e-11	2.8e-08
ENST00000662205.1	79.0859	-5.03716	0.762458	-6.60648	3.94e-11	2.95e-08
ENST00000380289.3	253.153	-2.93542	0.444829	-6.59898	4.14e-11	3.09e-08
ENST00000674341.1	169.561	-1.919	0.291013	-6.59419	4.28e-11	3.17e-08
ENST00000493477.2	132.531	2.87579	0.436525	6.58792	4.46e-11	3.29e-08
ENST00000651761.1	317.502	2.54009	0.38643	6.57324	4.92e-11	3.62e-08
ENST00000375855.3	37.4338	-2.73728	0.417034	-6.56369	5.25e-11	3.84e-08
ENST00000527326.1	341.651	1.8166	0.276879	6.561	5.34e-11	3.89e-08
ENST00000216338.9	203.099	1.98396	0.302658	6.55512	5.56e-11	4.03e-08
ENST00000605140.6	5059.68	1.98703	0.303224	6.553	5.64e-11	4.07e-08
ENST00000270310.7	26.6901	1.81329	0.276973	6.5468	5.88e-11	4.22e-08
ENST00000474864.5	411.184	1.96434	0.300221	6.543	6.03e-11	4.31e-08
ENST00000599898.5	447.108	2.16597	0.331143	6.5409	6.11e-11	4.35e-08
ENST00000465939.1	108.337	-2.27501	0.347873	-6.53976	6.16e-11	4.36e-08
ENST00000649249.1	406.828	2.98944	0.457906	6.52851	6.64e-11	4.68e-08
ENST00000371625.8	3216.59	1.94642	0.298463	6.52145	6.96e-11	4.89e-08
ENST00000312988.9	26.741	-2.87617	0.441478	-6.51487	7.28e-11	5.08e-08
ENST00000517492.5	117.996	-3.65263	0.561751	-6.50223	7.91e-11	5.49e-08
ENST00000466755.1	48.0891	-2.27523	0.349939	-6.50179	7.94e-11	5.49e-08
ENST00000621654.2	927.931	1.70509	0.262346	6.4994	8.06e-11	5.56e-08
ENST00000217182.6	1331.92	-3.42231	0.526612	-6.49873	8.1e-11	5.56e-08
ENST00000478845.2	93.1101	-1.68213	0.259021	-6.49419	8.35e-11	5.7e-08
ENST00000696558.1	251.993	2.91233	0.44963	6.47716	9.35e-11	6.35e-08
ENST00000262738.9	2183.64	-1.32579	0.204976	-6.46804	9.93e-11	6.72e-08
ENST00000373736.7	1431.47	-2.89795	0.448468	-6.46188	1.03e-10	6.97e-08
ENST00000338163.10	226.716	4.32032	0.669976	6.44847	1.13e-10	7.58e-08
ENST00000432418.1	53.9659	-2.2948	0.355966	-6.44668	1.14e-10	7.64e-08
ENST00000593726.5	376.167	-1.87313	0.290807	-6.44112	1.19e-10	7.89e-08
ENST00000390545.3	23812.2	2.35322	0.365472	6.43885	1.2e-10	7.97e-08
ENST00000464536.1	184.688	2.32588	0.36156	6.43292	1.25e-10	8.25e-08
ENST00000559499.1	122.505	-2.06836	0.322306	-6.41736	1.39e-10	9.11e-08
ENST00000491536.5	74.3055	3.21876	0.502022	6.41159	1.44e-10	9.42e-08
ENST00000544301.7	362.5	-4.4139	0.688639	-6.4096	1.46e-10	9.5e-08
ENST00000607056.1	1364.44	-1.63229	0.254839	-6.40521	1.5e-10	9.69e-08
ENST00000246551.9	564.046	1.72201	0.268841	6.40532	1.5e-10	9.69e-08
ENST00000197268.13	2210.5	-1.61687	0.252749	-6.39712	1.58e-10	1.02e-07
ENST00000624096.1	24.2787	1.28548	0.20101	6.39511	1.6e-10	1.03e-07
ENST00000490728.5	349.418	1.63378	0.25559	6.3922	1.64e-10	1.04e-07
ENST00000225844.7	430.742	2.45904	0.384704	6.39203	1.64e-10	1.04e-07
ENST00000390237.2	266432	2.40559	0.376745	6.38521	1.71e-10	1.08e-07
ENST00000598183.1	27.8858	-1.19082	0.186945	-6.36986	1.89e-10	1.19e-07
ENST00000372861.5	769.617	-2.02952	0.318818	-6.36576	1.94e-10	1.22e-07
ENST00000281830.4	1712.79	-2.04532	0.321536	-6.36109	2e-10	1.25e-07
ENST00000523016.1	63.7137	-1.95055	0.306697	-6.35986	2.02e-10	1.26e-07
ENST00000438075.7	252.994	1.64869	0.2593	6.35822	2.04e-10	1.26e-07
ENST00000473611.5	221.453	1.62245	0.255175	6.35818	2.04e-10	1.26e-07
ENST00000589374.1	279.122	1.76647	0.277964	6.35503	2.08e-10	1.28e-07
ENST00000313421.11	1815.67	1.79611	0.283051	6.34553	2.22e-10	1.36e-07
ENST00000379328.9	8548.34	-1.80873	0.285384	-6.33788	2.33e-10	1.42e-07
ENST00000580666.6	917.683	-1.78509	0.281966	-6.33086	2.44e-10	1.48e-07
ENST00000415641.8	311.235	-3.16117	0.499782	-6.32509	2.53e-10	1.53e-07
ENST00000457194.6	145.882	-1.71371	0.271339	-6.31577	2.69e-10	1.62e-07
ENST00000264474.4	734.63	1.62808	0.257918	6.3124	2.75e-10	1.65e-07
ENST00000654516.1	26.8329	-4.75722	0.753836	-6.31068	2.78e-10	1.66e-07
ENST00000473330.1	1231.17	2.42794	0.384907	6.30785	2.83e-10	1.67e-07
ENST00000613871.1	26.2812	-3.49692	0.554418	-6.30737	2.84e-10	1.67e-07
ENST00000250241.12	133.909	2.39682	0.380002	6.30738	2.84e-10	1.67e-07
ENST00000407817.3	921.751	1.92148	0.304627	6.30765	2.83e-10	1.67e-07
ENST00000261731.4	4.80183	2.98824	0.473869	6.30606	2.86e-10	1.68e-07
ENST00000347067.9	101.795	1.71245	0.271598	6.3051	2.88e-10	1.68e-07
ENST00000310398.7	2902.99	-3.1478	0.499571	-6.30101	2.96e-10	1.72e-07
ENST00000492361.1	1487.96	2.33006	0.369976	6.29787	3.02e-10	1.73e-07
ENST00000493176.1	7.90229	-2.17246	0.344947	-6.29796	3.02e-10	1.73e-07
ENST00000392653.3	5.53727	4.7122	0.748018	6.29959	2.98e-10	1.73e-07
ENST00000518029.5	153.802	-2.4698	0.392136	-6.29833	3.01e-10	1.73e-07
ENST00000611640.4	4337.84	-1.15669	0.183755	-6.29472	3.08e-10	1.76e-07
ENST00000366810.6	42.1271	1.98164	0.31522	6.28651	3.25e-10	1.85e-07
ENST00000374650.8	43.4787	1.39015	0.221253	6.28306	3.32e-10	1.88e-07
ENST00000374968.9	13.2662	5.08588	0.809684	6.28132	3.36e-10	1.9e-07
ENST00000490965.1	72.5527	1.63896	0.261405	6.26984	3.61e-10	2.03e-07
ENST00000480798.2	677.653	1.69773	0.270799	6.26934	3.63e-10	2.03e-07
ENST00000368742.4	9.63126	2.33138	0.372073	6.26592	3.71e-10	2.07e-07
ENST00000373091.8	1230	-2.33463	0.37321	-6.25555	3.96e-10	2.2e-07
ENST00000567786.2	41.2256	1.4956	0.239078	6.25569	3.96e-10	2.2e-07
ENST00000429712.5	42.4247	-1.74146	0.278522	-6.25251	4.04e-10	2.23e-07
ENST00000664650.1	27.5607	2.15404	0.345096	6.24185	4.32e-10	2.38e-07
ENST00000436066.4	973.304	1.26587	0.202838	6.24078	4.35e-10	2.39e-07
ENST00000433971.5	204.286	-2.01291	0.322772	-6.23634	4.48e-10	2.45e-07
ENST00000619119.4	195.752	-1.97672	0.317048	-6.23475	4.53e-10	2.47e-07
ENST00000361441.5	2381.17	1.1269	0.180908	6.22914	4.69e-10	2.55e-07
ENST00000606973.5	26.616	-2.3918	0.38417	-6.22589	4.79e-10	2.59e-07
ENST00000504391.5	15.2997	-5.8997	0.948109	-6.2226	4.89e-10	2.64e-07
ENST00000526561.1	16.9453	2.32391	0.373593	6.22043	4.96e-10	2.66e-07
ENST00000411846.6	94.4621	-4.26664	0.686033	-6.21929	4.99e-10	2.67e-07
ENST00000355710.8	842.786	-2.25996	0.36345	-6.21809	5.03e-10	2.68e-07
ENST00000360835.9	403.912	-2.29248	0.36894	-6.21368	5.18e-10	2.75e-07
ENST00000690653.2	62.8465	1.66849	0.268592	6.21198	5.23e-10	2.77e-07
ENST00000369124.5	4107.04	1.13565	0.182843	6.21106	5.26e-10	2.78e-07
ENST00000592889.1	115.128	1.4983	0.241558	6.20265	5.55e-10	2.92e-07
ENST00000360658.3	223.739	1.33838	0.215978	6.1968	5.76e-10	3.02e-07
ENST00000390323.2	61565.2	2.50126	0.403815	6.19407	5.86e-10	3.06e-07
ENST00000607622.2	23.2609	1.12434	0.181557	6.19274	5.91e-10	3.08e-07
ENST00000606476.1	286.281	-3.04232	0.491397	-6.19117	5.97e-10	3.1e-07
ENST00000544450.6	8470.05	-1.41017	0.227861	-6.18872	6.07e-10	3.14e-07
ENST00000586680.1	43.4428	-1.80758	0.292206	-6.18598	6.17e-10	3.18e-07
ENST00000361640.5	999.226	-2.25724	0.364998	-6.18424	6.24e-10	3.21e-07
ENST00000623228.1	261.954	1.09197	0.176621	6.18258	6.31e-10	3.23e-07
ENST00000674359.1	78.8345	-1.45288	0.235242	-6.17609	6.57e-10	3.35e-07
ENST00000367294.4	3565.04	-1.45901	0.23627	-6.17521	6.61e-10	3.36e-07
ENST00000356714.6	855.228	1.18326	0.192073	6.16047	7.25e-10	3.67e-07
ENST00000246115.5	493.024	1.80548	0.293102	6.15988	7.28e-10	3.67e-07
ENST00000221954.7	29.4627	1.5079	0.244783	6.16015	7.27e-10	3.67e-07
ENST00000600397.1	75.7577	-1.58208	0.257739	-6.13832	8.34e-10	4.19e-07
ENST00000467845.5	455.433	1.90082	0.310027	6.13116	8.72e-10	4.37e-07
ENST00000255087.10	733.006	-1.67176	0.2727	-6.1304	8.77e-10	4.37e-07
ENST00000592072.1	31.8043	-1.90141	0.310191	-6.12981	8.8e-10	4.38e-07
ENST00000655714.1	236.997	-1.72617	0.28167	-6.12834	8.88e-10	4.39e-07
ENST00000532240.2	418.261	-1.36521	0.222754	-6.12878	8.86e-10	4.39e-07
ENST00000469423.1	24.0806	1.7546	0.286772	6.11846	9.45e-10	4.65e-07
ENST00000390559.6	43839.1	2.47745	0.405723	6.10626	1.02e-09	5.01e-07
ENST00000693208.2	748.23	-5.09993	0.835326	-6.10532	1.03e-09	5.02e-07
ENST00000374202.7	3326.43	1.64563	0.269669	6.1024	1.04e-09	5.1e-07
ENST00000675760.1	15.0415	2.55019	0.418073	6.09986	1.06e-09	5.16e-07
ENST00000158762.8	1984.93	1.78443	0.292914	6.09199	1.12e-09	5.41e-07
ENST00000219150.10	6416.08	1.4126	0.232605	6.07295	1.26e-09	6.07e-07
ENST00000668794.1	113.162	-1.77389	0.292168	-6.07148	1.27e-09	6.1e-07
ENST00000588523.1	396.666	1.51244	0.249239	6.06821	1.29e-09	6.21e-07
ENST00000221978.10	638.093	1.76599	0.291127	6.06605	1.31e-09	6.28e-07
ENST00000461073.6	245.402	1.58844	0.262292	6.05599	1.4e-09	6.66e-07
ENST00000586020.1	139.436	-2.18595	0.361248	-6.05111	1.44e-09	6.84e-07
ENST00000651718.1	540.297	-0.944922	0.156165	-6.05079	1.44e-09	6.84e-07
ENST00000554161.1	28.4134	1.64391	0.271774	6.04881	1.46e-09	6.9e-07
ENST00000533097.6	344.457	2.43323	0.402456	6.04595	1.49e-09	7e-07
ENST00000264824.5	592.707	1.26557	0.209441	6.04262	1.52e-09	7.12e-07
ENST00000649792.2	2983.07	-2.27933	0.37801	-6.0298	1.64e-09	7.67e-07
ENST00000560894.1	179.351	-2.65529	0.440328	-6.03026	1.64e-09	7.67e-07
ENST00000593054.5	29.1071	2.35827	0.39128	6.02707	1.67e-09	7.76e-07
ENST00000617703.1	181.582	1.28825	0.213748	6.02698	1.67e-09	7.76e-07
ENST00000358776.7	3302.19	-1.49786	0.248835	-6.0195	1.75e-09	8.1e-07
ENST00000319933.7	1455.7	-1.24675	0.207157	-6.01839	1.76e-09	8.12e-07
ENST00000610913.2	94.2246	2.21679	0.368361	6.01798	1.77e-09	8.12e-07
ENST00000628174.2	17.9558	-4.61086	0.767033	-6.01129	1.84e-09	8.44e-07
ENST00000554482.1	34.3596	1.92255	0.319994	6.0081	1.88e-09	8.58e-07
ENST00000536066.1	1574.46	2.28322	0.380129	6.00644	1.9e-09	8.65e-07
ENST00000376477.5	58.5704	2.1149	0.352237	6.0042	1.92e-09	8.74e-07
ENST00000413272.7	197.471	1.91341	0.319238	5.99369	2.05e-09	9.3e-07
ENST00000328439.6	58.6229	-3.49492	0.583203	-5.99264	2.06e-09	9.33e-07
ENST00000372712.6	145.421	-1.00659	0.168016	-5.99103	2.09e-09	9.4e-07
ENST00000368707.5	271.504	3.52376	0.588237	5.99038	2.09e-09	9.41e-07
ENST00000703758.1	135.325	-4.28288	0.71532	-5.98736	2.13e-09	9.55e-07
ENST00000606771.2	103.763	1.29913	0.217464	5.97401	2.31e-09	1.03e-06
ENST00000283752.10	55.2643	6.47805	1.08496	5.97079	2.36e-09	1.05e-06
ENST00000367027.5	320.695	1.67711	0.281983	5.94757	2.72e-09	1.21e-06
ENST00000519691.1	66.9735	-2.22411	0.374122	-5.94489	2.77e-09	1.23e-06
ENST00000330722.7	1216.76	3.41618	0.574717	5.9441	2.78e-09	1.23e-06
ENST00000420453.1	342.718	-2.87994	0.484625	-5.94261	2.81e-09	1.24e-06
ENST00000400633.3	31.8343	0.860887	0.144937	5.93974	2.85e-09	1.25e-06
ENST00000307659.6	639.106	-5.16168	0.869403	-5.93705	2.9e-09	1.27e-06
ENST00000460823.1	86.6578	1.67358	0.282094	5.9327	2.98e-09	1.3e-06
ENST00000529594.5	15.6937	5.16845	0.871155	5.93287	2.98e-09	1.3e-06
ENST00000690777.1	34.6361	-2.19593	0.370376	-5.92891	3.05e-09	1.32e-06
ENST00000273223.10	8640.41	1.33797	0.225831	5.92465	3.13e-09	1.35e-06
ENST00000300961.10	149.911	1.96397	0.331468	5.92507	3.12e-09	1.35e-06
ENST00000595883.6	435.9	2.29429	0.387262	5.92438	3.13e-09	1.35e-06
ENST00000315765.10	34.7419	1.97448	0.333317	5.92372	3.15e-09	1.35e-06
ENST00000465428.1	20.2536	1.97789	0.334126	5.91958	3.23e-09	1.38e-06
ENST00000225941.6	828.392	1.23058	0.208194	5.91072	3.41e-09	1.45e-06
ENST00000377017.5	162.915	2.15469	0.365353	5.89755	3.69e-09	1.57e-06
ENST00000299339.3	92.2418	2.84728	0.483396	5.89016	3.86e-09	1.63e-06
ENST00000650285.1	6262.59	-1.47276	0.250034	-5.89022	3.86e-09	1.63e-06
ENST00000560785.1	7.61683	-2.28302	0.388251	-5.88028	4.1e-09	1.72e-06
ENST00000360156.11	730.073	0.737006	0.125336	5.88024	4.1e-09	1.72e-06
ENST00000444278.3	192.402	2.22033	0.37766	5.87918	4.12e-09	1.73e-06
ENST00000443373.2	6.78927	2.75401	0.468504	5.8783	4.15e-09	1.74e-06
ENST00000537363.5	500.876	2.11143	0.359328	5.87605	4.2e-09	1.75e-06
ENST00000536559.1	35.4997	-2.08058	0.354224	-5.87364	4.26e-09	1.78e-06
ENST00000436077.1	278.334	-2.91423	0.496298	-5.87194	4.31e-09	1.79e-06
ENST00000377050.5	4164.49	2.00312	0.341266	5.86969	4.37e-09	1.81e-06
ENST00000398606.10	12518.7	1.39297	0.237423	5.86702	4.44e-09	1.83e-06
ENST00000529246.4	360.356	-2.1123	0.360085	-5.86612	4.46e-09	1.84e-06
ENST00000639832.1	457.598	-1.92918	0.329081	-5.86234	4.56e-09	1.88e-06
ENST00000565494.5	65.1609	1.7293	0.295065	5.86075	4.61e-09	1.89e-06
ENST00000397463.3	217.051	1.23128	0.210253	5.85617	4.74e-09	1.94e-06
ENST00000546707.1	6.22786	1.95705	0.334434	5.85183	4.86e-09	1.98e-06
ENST00000295171.10	424.978	-1.68716	0.288468	-5.84867	4.96e-09	2.01e-06
ENST00000375472.8	1140.76	-1.90765	0.326171	-5.84863	4.96e-09	2.01e-06
ENST00000376093.6	40.7877	1.6896	0.289198	5.84239	5.15e-09	2.08e-06
ENST00000648821.1	1739.64	-1.48288	0.253861	-5.84133	5.18e-09	2.09e-06
ENST00000438597.1	4.03067	-3.98929	0.683166	-5.83942	5.24e-09	2.11e-06
ENST00000599831.6	87.3117	-4.57204	0.783326	-5.8367	5.32e-09	2.14e-06
ENST00000472217.1	2173.42	1.18265	0.202759	5.83277	5.45e-09	2.18e-06
ENST00000497908.1	93.2046	1.84578	0.316505	5.83174	5.49e-09	2.19e-06
ENST00000693001.2	32.8673	-1.56117	0.267757	-5.83055	5.52e-09	2.2e-06
ENST00000595464.3	784.636	-1.59511	0.273713	-5.82766	5.62e-09	2.23e-06
ENST00000539241.1	122.937	-2.05612	0.352877	-5.82674	5.65e-09	2.24e-06
ENST00000543164.5	177.552	1.24298	0.213342	5.82621	5.67e-09	2.24e-06
ENST00000290354.6	1470.98	1.41981	0.243824	5.8231	5.78e-09	2.28e-06
ENST00000702115.1	2.81033	2.63136	0.451929	5.82251	5.8e-09	2.28e-06
ENST00000317987.6	1921.74	3.06294	0.526588	5.81658	6.01e-09	2.35e-06
ENST00000595636.1	24.775	1.48743	0.255769	5.81552	6.04e-09	2.36e-06
ENST00000573478.5	240.103	2.09265	0.359987	5.81312	6.13e-09	2.39e-06
ENST00000444393.7	462.083	1.56169	0.268858	5.80861	6.3e-09	2.45e-06
ENST00000591341.1	29.1573	2.30519	0.396891	5.80811	6.32e-09	2.45e-06
ENST00000416295.1	81.9128	-2.53348	0.436465	-5.80454	6.45e-09	2.49e-06
ENST00000381360.9	40.3532	-4.21695	0.726484	-5.8046	6.45e-09	2.49e-06
ENST00000342991.10	405.46	-1.98207	0.341538	-5.80335	6.5e-09	2.5e-06
ENST00000546793.1	511.997	-1.06102	0.182848	-5.80275	6.52e-09	2.51e-06
ENST00000400199.5	2940.53	-1.1368	0.19597	-5.80087	6.6e-09	2.53e-06
ENST00000376701.5	965.858	1.24482	0.214634	5.79974	6.64e-09	2.54e-06
ENST00000415330.4	69.0427	1.45261	0.250543	5.79783	6.72e-09	2.56e-06
ENST00000437550.2	316.32	1.47596	0.254711	5.79467	6.85e-09	2.6e-06
ENST00000371964.5	951.292	1.21829	0.210298	5.79318	6.91e-09	2.62e-06
ENST00000339994.5	508.441	-1.40482	0.242508	-5.79291	6.92e-09	2.62e-06
ENST00000057513.8	65.4037	2.2078	0.381289	5.79035	7.02e-09	2.65e-06
ENST00000339656.8	5427.48	-0.95094	0.164251	-5.78955	7.06e-09	2.66e-06
ENST00000367712.2	3.90659	3.40083	0.587506	5.78859	7.1e-09	2.67e-06
ENST00000229135.4	50.3985	2.04767	0.353776	5.78805	7.12e-09	2.67e-06
ENST00000478895.1	30.9636	1.48384	0.256568	5.78343	7.32e-09	2.74e-06
ENST00000578402.5	999.279	1.57344	0.272123	5.78208	7.38e-09	2.75e-06
ENST00000702383.1	5.37303	1.87728	0.324809	5.77965	7.49e-09	2.79e-06
ENST00000419761.6	237.27	-2.35704	0.407875	-5.77883	7.52e-09	2.79e-06
ENST00000512559.5	18.8195	-3.3609	0.581743	-5.77729	7.59e-09	2.8e-06
ENST00000230914.4	1644.75	-1.39845	0.242055	-5.7774	7.59e-09	2.8e-06
ENST00000574393.1	47.8028	1.57993	0.273457	5.7776	7.58e-09	2.8e-06
ENST00000393189.2	541.001	1.89179	0.327838	5.77051	7.9e-09	2.91e-06
ENST00000431979.1	450.744	-3.05335	0.529203	-5.76971	7.94e-09	2.91e-06
ENST00000646170.1	29.6678	-2.35419	0.408117	-5.76841	8e-09	2.93e-06
ENST00000503452.5	31.4634	-3.61751	0.627524	-5.76474	8.18e-09	2.98e-06
ENST00000649765.2	1470.32	1.16601	0.202309	5.76351	8.24e-09	3e-06
ENST00000391701.1	2488.73	-1.25811	0.218473	-5.75866	8.48e-09	3.08e-06
ENST00000221972.8	1334.13	2.06627	0.358879	5.75756	8.53e-09	3.09e-06
ENST00000440549.6	75.1883	-2.00968	0.349132	-5.75622	8.6e-09	3.1e-06
ENST00000597692.1	709.788	2.01075	0.349299	5.75654	8.59e-09	3.1e-06
ENST00000538152.1	169.793	1.34307	0.233347	5.75566	8.63e-09	3.11e-06
ENST00000527413.1	50.2837	2.85363	0.496117	5.75193	8.82e-09	3.17e-06
ENST00000541586.5	1081.11	1.31572	0.228843	5.74943	8.95e-09	3.21e-06
ENST00000587088.1	39.5709	2.04013	0.354927	5.74803	9.03e-09	3.23e-06
ENST00000666889.1	75.135	-2.92157	0.508431	-5.74625	9.12e-09	3.25e-06
ENST00000446745.2	622.477	1.73696	0.302316	5.74553	9.16e-09	3.26e-06
ENST00000397487.4	579.925	-3.00805	0.523621	-5.74471	9.21e-09	3.27e-06
ENST00000442815.1	63.3659	1.40101	0.243904	5.74412	9.24e-09	3.27e-06
ENST00000513389.1	68.0205	5.551	0.966509	5.74335	9.28e-09	3.28e-06
ENST00000619166.1	90.0607	1.10516	0.192437	5.74298	9.3e-09	3.28e-06
ENST00000505089.6	333.076	-2.19743	0.382671	-5.74234	9.34e-09	3.28e-06
ENST00000448733.3	35.4832	-4.13764	0.720883	-5.73968	9.49e-09	3.33e-06
ENST00000367307.8	124.753	1.41323	0.246275	5.73844	9.56e-09	3.34e-06
ENST00000487463.1	164.623	-1.23953	0.216667	-5.7209	1.06e-08	3.7e-06
ENST00000435629.5	281.65	-3.00709	0.525749	-5.71964	1.07e-08	3.72e-06
ENST00000409856.8	1063.95	-1.97543	0.345402	-5.71922	1.07e-08	3.72e-06
ENST00000454442.5	46.7113	-1.05156	0.183899	-5.71816	1.08e-08	3.74e-06
ENST00000627215.1	30.9856	1.68381	0.294544	5.71669	1.09e-08	3.76e-06
ENST00000379725.5	4.92716	-5.19025	0.90839	-5.71368	1.11e-08	3.82e-06
ENST00000426471.6	243.468	-2.8569	0.500304	-5.71033	1.13e-08	3.88e-06
ENST00000264553.6	300.863	1.84126	0.322472	5.70981	1.13e-08	3.89e-06
ENST00000478808.4	107.962	1.67327	0.293373	5.70356	1.17e-08	4.02e-06
ENST00000674379.1	9.0987	-2.10012	0.368345	-5.7015	1.19e-08	4.06e-06
ENST00000368713.8	109.647	1.68562	0.295776	5.69895	1.21e-08	4.12e-06
ENST00000373509.6	2695.22	1.03424	0.181585	5.69562	1.23e-08	4.19e-06
ENST00000525765.5	16.3531	1.91337	0.336005	5.69447	1.24e-08	4.21e-06
ENST00000381848.7	709.37	-1.89045	0.332344	-5.68821	1.28e-08	4.35e-06
ENST00000597595.6	1473.94	1.02227	0.179817	5.68504	1.31e-08	4.43e-06
ENST00000592540.6	862.427	1.52175	0.267702	5.68449	1.31e-08	4.43e-06
ENST00000442782.7	5.74238	-3.17113	0.558075	-5.68226	1.33e-08	4.48e-06
ENST00000489949.5	55.1201	1.2899	0.22707	5.68062	1.34e-08	4.51e-06
ENST00000519821.1	31.6842	-3.40339	0.599229	-5.67962	1.35e-08	4.52e-06
ENST00000687124.1	3.85954	-3.58544	0.63125	-5.6799	1.35e-08	4.52e-06
ENST00000361278.7	841.785	1.14573	0.201799	5.67756	1.37e-08	4.56e-06
ENST00000606245.1	110.649	-1.71139	0.301579	-5.67478	1.39e-08	4.63e-06
ENST00000390547.3	88795.2	2.01142	0.354644	5.67164	1.41e-08	4.69e-06
ENST00000301141.10	39.624	-3.31063	0.583738	-5.67143	1.42e-08	4.69e-06
ENST00000331035.10_PAR_Y	299.319	0.881721	0.15546	5.6717	1.41e-08	4.69e-06
ENST00000301653.9	6807.27	2.97722	0.525377	5.66682	1.45e-08	4.81e-06
ENST00000672162.1	803.394	-1.44816	0.255605	-5.66561	1.46e-08	4.83e-06
ENST00000372969.8	4695.52	1.36707	0.241412	5.66283	1.49e-08	4.9e-06
ENST00000358232.11	3939.51	-1.36459	0.241049	-5.66105	1.5e-08	4.93e-06
ENST00000598364.1	220.861	2.80737	0.495913	5.66101	1.5e-08	4.93e-06
ENST00000592997.6	47.3075	2.04275	0.360964	5.65916	1.52e-08	4.97e-06
ENST00000687174.1	318.429	1.59266	0.281554	5.65665	1.54e-08	5.02e-06
ENST00000608958.1	20.4023	1.41518	0.250172	5.65682	1.54e-08	5.02e-06
ENST00000368733.4	8684.81	2.77285	0.490374	5.65457	1.56e-08	5.08e-06
ENST00000524600.5	91.9273	2.74202	0.485209	5.65122	1.59e-08	5.16e-06
ENST00000357355.7	2609.11	1.12525	0.199158	5.65007	1.6e-08	5.19e-06
ENST00000624216.1	297.199	-1.23919	0.219439	-5.6471	1.63e-08	5.26e-06
ENST00000558838.1	389.466	-1.53513	0.271847	-5.64704	1.63e-08	5.26e-06
ENST00000517970.6	5590.28	-1.17192	0.207548	-5.6465	1.64e-08	5.26e-06
ENST00000607643.1	42.6253	-1.10054	0.194953	-5.64519	1.65e-08	5.29e-06
ENST00000649865.1	2697.11	-1.45787	0.258307	-5.64396	1.66e-08	5.32e-06
ENST00000257566.7	1912.76	-1.32602	0.235087	-5.64054	1.7e-08	5.42e-06
ENST00000618791.1	2.75901	2.3164	0.410824	5.63842	1.72e-08	5.47e-06
ENST00000307098.5	26.02	4.0912	0.725769	5.63706	1.73e-08	5.5e-06
ENST00000372285.8	1060.89	1.10187	0.195557	5.63451	1.76e-08	5.57e-06
ENST00000464951.1	176.821	-1.54483	0.274237	-5.63321	1.77e-08	5.59e-06
ENST00000376262.7	392.108	1.93427	0.34336	5.63337	1.77e-08	5.59e-06
ENST00000410055.5	772.977	1.02577	0.182205	5.62974	1.8e-08	5.69e-06
ENST00000494319.1	359.746	2.10969	0.374895	5.6274	1.83e-08	5.75e-06
ENST00000528585.5	117.606	2.30926	0.410346	5.62758	1.83e-08	5.75e-06
ENST00000242770.9	232.718	1.51428	0.269122	5.62675	1.84e-08	5.76e-06
ENST00000651727.1	10.3526	-2.38226	0.42343	-5.62611	1.84e-08	5.77e-06
ENST00000471773.5	167.2	1.72437	0.306943	5.61787	1.93e-08	6.04e-06
ENST00000532166.5	13.2313	1.55911	0.277661	5.61515	1.96e-08	6.12e-06
ENST00000623412.1	31.9156	-0.888753	0.158298	-5.61443	1.97e-08	6.13e-06
ENST00000340258.10	2000.8	1.41846	0.252876	5.60931	2.03e-08	6.29e-06
ENST00000267842.10	469.457	-2.23826	0.399016	-5.60945	2.03e-08	6.29e-06
ENST00000471088.1	40.0771	2.1657	0.386295	5.60633	2.07e-08	6.37e-06
ENST00000567249.1	7.48719	-1.72964	0.308527	-5.60612	2.07e-08	6.37e-06
ENST00000356661.7	11.2347	-5.95801	1.06273	-5.60631	2.07e-08	6.37e-06
ENST00000493449.5	92.9105	-1.61925	0.288874	-5.60539	2.08e-08	6.39e-06
ENST00000595217.1	129.934	1.53164	0.273271	5.60484	2.08e-08	6.39e-06
ENST00000504449.2	157.915	2.10369	0.375393	5.60398	2.09e-08	6.41e-06
ENST00000270792.10	10968.6	1.09289	0.195061	5.60284	2.11e-08	6.43e-06
ENST00000396664.2	209.614	1.34459	0.239971	5.60315	2.1e-08	6.43e-06
ENST00000373645.3	71.4142	2.19553	0.391993	5.60095	2.13e-08	6.49e-06
ENST00000263863.9	463.519	1.82075	0.325146	5.59979	2.15e-08	6.51e-06
ENST00000562929.1	850.903	1.83368	0.327462	5.59968	2.15e-08	6.51e-06
ENST00000393067.8	1227.36	1.82702	0.326377	5.59788	2.17e-08	6.56e-06
ENST00000368750.8	8.83253	6.30715	1.12687	5.59705	2.18e-08	6.58e-06
ENST00000321153.9	41291.9	1.21089	0.21641	5.59534	2.2e-08	6.63e-06
ENST00000517574.5	7.32191	-2.86271	0.511668	-5.59485	2.21e-08	6.64e-06
ENST00000251102.13	12.0824	3.13754	0.560967	5.5931	2.23e-08	6.69e-06
ENST00000659341.1	73.819	-1.98426	0.354884	-5.5913	2.25e-08	6.75e-06
ENST00000497858.1	273.69	-1.74204	0.31187	-5.5858	2.33e-08	6.95e-06
ENST00000601232.1	180.077	2.59303	0.464345	5.58427	2.35e-08	7e-06
ENST00000412425.1	174.101	-2.05498	0.368183	-5.58141	2.39e-08	7.1e-06
ENST00000552039.2	1236.12	1.32769	0.237923	5.58033	2.4e-08	7.14e-06
ENST00000458387.6	96.647	2.40682	0.431479	5.57806	2.43e-08	7.21e-06
ENST00000453793.1	22.9712	1.73072	0.310346	5.57673	2.45e-08	7.26e-06
ENST00000625410.1	78.3526	1.40362	0.251775	5.57491	2.48e-08	7.32e-06
ENST00000617633.5	1736.73	1.0631	0.190715	5.57428	2.49e-08	7.33e-06
ENST00000592057.1	26.5626	-1.43221	0.256976	-5.5733	2.5e-08	7.36e-06
ENST00000472885.1	22.2538	-1.96697	0.352994	-5.57224	2.51e-08	7.39e-06
ENST00000630952.2	318.109	1.56298	0.280509	5.57193	2.52e-08	7.39e-06
ENST00000509705.3	680.404	1.10706	0.198727	5.57077	2.54e-08	7.42e-06
ENST00000429878.2	1.99056	1.8125	0.325658	5.56564	2.61e-08	7.62e-06
ENST00000377032.5	165.65	2.3549	0.423096	5.56588	2.61e-08	7.62e-06
ENST00000468650.1	27.5847	-2.0622	0.370585	-5.56471	2.63e-08	7.64e-06
ENST00000368448.5	73.0335	-5.08721	0.914423	-5.5633	2.65e-08	7.69e-06
ENST00000368708.9	739.8	2.62163	0.471352	5.56194	2.67e-08	7.73e-06
ENST00000469940.5	39.9332	1.40171	0.252056	5.56109	2.68e-08	7.76e-06
ENST00000289473.11	928.664	1.481	0.266407	5.55917	2.71e-08	7.81e-06
ENST00000006750.8	326.097	2.09398	0.37666	5.55933	2.71e-08	7.81e-06
ENST00000483212.1	96.9137	1.87397	0.337356	5.55486	2.78e-08	7.99e-06
ENST00000648588.1	27.8997	2.50569	0.451105	5.55455	2.78e-08	7.99e-06
ENST00000425370.1	19.3405	-2.11276	0.38058	-5.55142	2.83e-08	8.09e-06
ENST00000545484.1	42.5074	-1.77889	0.320439	-5.5514	2.83e-08	8.09e-06
ENST00000548015.1	91.7438	-1.41957	0.255704	-5.55163	2.83e-08	8.09e-06
ENST00000550143.5	323.407	1.39759	0.251818	5.54998	2.86e-08	8.14e-06
ENST00000453344.6	960.236	1.56313	0.281687	5.54917	2.87e-08	8.17e-06
ENST00000333383.8	44.8335	2.41877	0.435913	5.54874	2.88e-08	8.17e-06
ENST00000392882.7	9088.27	1.46267	0.263726	5.54617	2.92e-08	8.28e-06
ENST00000692834.1	26.2207	1.91301	0.344948	5.5458	2.93e-08	8.28e-06
ENST00000510795.2	21.81	-3.95417	0.713283	-5.54363	2.96e-08	8.37e-06
ENST00000559821.2	293.408	-2.23581	0.403348	-5.54314	2.97e-08	8.38e-06
ENST00000368325.5	99.4412	1.70285	0.307269	5.5419	2.99e-08	8.42e-06
ENST00000397820.5	160.164	1.25072	0.225711	5.54125	3e-08	8.44e-06
ENST00000432673.1	57.4184	1.06176	0.19164	5.54036	3.02e-08	8.46e-06
ENST00000482015.5	50.8771	1.42124	0.25678	5.53484	3.12e-08	8.72e-06
ENST00000508749.1	181.219	1.64981	0.298141	5.53365	3.14e-08	8.76e-06
ENST00000367569.4	3599.84	0.972468	0.175752	5.53319	3.14e-08	8.77e-06
ENST00000402714.6	761.023	-1.35026	0.244071	-5.53225	3.16e-08	8.8e-06
ENST00000624111.2	37.3193	-2.64928	0.479022	-5.5306	3.19e-08	8.87e-06
ENST00000640283.2	61.3864	-2.02322	0.366076	-5.52678	3.26e-08	9.05e-06
ENST00000515627.3	25.2157	-2.5234	0.457004	-5.5216	3.36e-08	9.3e-06
ENST00000578649.1	110.269	1.46545	0.265509	5.51941	3.4e-08	9.4e-06
ENST00000620309.4	95.4324	1.33552	0.242043	5.51767	3.44e-08	9.48e-06
ENST00000659520.1	21.6072	-2.45398	0.444875	-5.51612	3.47e-08	9.54e-06
ENST00000466424.5	486.939	1.72215	0.31228	5.51477	3.49e-08	9.6e-06
ENST00000432985.1	42.4933	-2.92939	0.531484	-5.51171	3.55e-08	9.75e-06
ENST00000633705.1	1192	1.89178	0.343363	5.50958	3.6e-08	9.85e-06
ENST00000531485.5	120.795	1.47776	0.268389	5.50605	3.67e-08	1e-05
ENST00000374026.7	1531.8	1.32415	0.240554	5.50459	3.7e-08	1.01e-05
ENST00000372269.7	125.527	2.25448	0.40966	5.5033	3.73e-08	1.02e-05
ENST00000390626.2	2393.34	2.32675	0.423055	5.49987	3.8e-08	1.03e-05
ENST00000423083.1	239.996	1.40768	0.256009	5.49855	3.83e-08	1.04e-05
ENST00000518893.1	69.2578	1.14012	0.207517	5.49409	3.93e-08	1.06e-05
ENST00000553883.1	85.8198	1.71351	0.311968	5.49259	3.96e-08	1.07e-05
ENST00000256362.5	10.2227	3.48674	0.634883	5.49195	3.98e-08	1.07e-05
ENST00000311069.6	113.71	-1.48168	0.269795	-5.49188	3.98e-08	1.07e-05
ENST00000484115.5	484.941	-0.674442	0.122849	-5.49003	4.02e-08	1.08e-05
ENST00000518171.5	222.761	-1.77152	0.322861	-5.48694	4.09e-08	1.1e-05
ENST00000231749.8	340.27	-1.75023	0.319069	-5.48543	4.12e-08	1.11e-05
ENST00000517870.2	55.6009	1.3471	0.245676	5.48325	4.18e-08	1.12e-05
ENST00000464385.1	347.188	1.64635	0.300557	5.47767	4.31e-08	1.15e-05
ENST00000445337.1	29.1339	2.42806	0.44354	5.47428	4.39e-08	1.17e-05
ENST00000528699.1	336.153	1.54564	0.282427	5.47272	4.43e-08	1.18e-05
ENST00000482980.5	37.3941	-5.18624	0.94793	-5.47111	4.47e-08	1.19e-05
ENST00000324385.9	18.4897	-6.39046	1.16852	-5.46886	4.53e-08	1.2e-05
ENST00000551890.1	19.6326	-1.33458	0.244085	-5.46771	4.56e-08	1.21e-05
ENST00000005180.9	31.6933	1.78837	0.327381	5.46267	4.69e-08	1.24e-05
ENST00000393437.8	1819.18	-1.65787	0.303585	-5.46095	4.74e-08	1.25e-05
ENST00000410078.2	21.4763	2.57692	0.471981	5.45981	4.77e-08	1.26e-05
ENST00000408945.5	16.7859	1.61653	0.296101	5.45939	4.78e-08	1.26e-05
ENST00000311083.10	1233.56	1.13189	0.207404	5.4574	4.83e-08	1.27e-05
ENST00000559876.2	215.553	1.26488	0.231798	5.45681	4.85e-08	1.27e-05
ENST00000488802.1	91.0497	1.34931	0.247303	5.4561	4.87e-08	1.27e-05
ENST00000593609.1	220.516	2.02534	0.371219	5.45591	4.87e-08	1.27e-05
ENST00000276420.9	1122.05	1.34157	0.24591	5.45554	4.88e-08	1.27e-05
ENST00000442785.1	7.12394	2.105	0.386003	5.45333	4.94e-08	1.29e-05
ENST00000512783.5	390.029	-0.617721	0.113305	-5.45185	4.98e-08	1.29e-05
ENST00000519476.6	65.0082	-1.34207	0.246166	-5.45188	4.98e-08	1.29e-05
ENST00000351018.5	3729.09	0.982133	0.180285	5.44766	5.1e-08	1.32e-05
ENST00000592669.1	13.6521	-2.509	0.460562	-5.4477	5.1e-08	1.32e-05
ENST00000297524.8	17.7797	-2.57696	0.473179	-5.44606	5.15e-08	1.33e-05
ENST00000346208.4	4131.77	-1.52333	0.27976	-5.44513	5.18e-08	1.33e-05
ENST00000485554.6	1217.4	1.0829	0.198894	5.44463	5.19e-08	1.34e-05
ENST00000451070.1	68.2899	-1.76192	0.323817	-5.4411	5.3e-08	1.36e-05
ENST00000458420.7	5460.28	-1.95059	0.358564	-5.44	5.33e-08	1.36e-05
ENST00000259006.8	624.659	1.03955	0.191083	5.44029	5.32e-08	1.36e-05
ENST00000510448.5	54.1946	1.31869	0.242436	5.43934	5.35e-08	1.36e-05
ENST00000523242.1	4.34572	-3.35704	0.617182	-5.43931	5.35e-08	1.36e-05
ENST00000609274.5	93.1077	1.71938	0.316115	5.43908	5.36e-08	1.36e-05
ENST00000451823.2	36.8732	1.44404	0.26585	5.43179	5.58e-08	1.42e-05
ENST00000355358.1	483.297	-2.02823	0.373749	-5.42671	5.74e-08	1.46e-05
ENST00000466254.1	2780.63	1.6346	0.301402	5.42334	5.85e-08	1.48e-05
ENST00000339852.5	1260.9	2.36761	0.436555	5.4234	5.85e-08	1.48e-05
ENST00000368299.7	578.198	-4.95168	0.913738	-5.41915	5.99e-08	1.51e-05
ENST00000302125.9	2649.48	2.05849	0.379869	5.41895	5.99e-08	1.51e-05
ENST00000587500.5	190.699	1.82955	0.337613	5.41907	5.99e-08	1.51e-05
ENST00000482528.1	45.0943	-1.99183	0.367681	-5.41728	6.05e-08	1.52e-05
ENST00000390636.2	796.752	3.0299	0.559459	5.41577	6.1e-08	1.53e-05
ENST00000444310.5	16.9288	1.18579	0.218943	5.41599	6.1e-08	1.53e-05
ENST00000589379.1	574.71	2.24706	0.414914	5.41572	6.1e-08	1.53e-05
ENST00000471368.1	47.7569	2.54291	0.469639	5.41461	6.14e-08	1.53e-05
ENST00000332029.4	393.599	1.10559	0.204208	5.41406	6.16e-08	1.54e-05
ENST00000471286.5	162.884	1.84431	0.340844	5.41102	6.27e-08	1.56e-05
ENST00000476978.2	435.367	-0.942703	0.174234	-5.41054	6.28e-08	1.56e-05
ENST00000623628.1	12.841	-3.13053	0.578629	-5.41026	6.29e-08	1.56e-05
ENST00000373602.10	412.896	1.33614	0.247138	5.40644	6.43e-08	1.59e-05
ENST00000509736.5	4893.67	2.99162	0.553334	5.40654	6.43e-08	1.59e-05
ENST00000649523.1	38.8949	1.19901	0.221804	5.40573	6.45e-08	1.59e-05
ENST00000648410.1	5.34266	1.49043	0.27571	5.40578	6.45e-08	1.59e-05
ENST00000475513.5	98.2619	1.22623	0.226875	5.40488	6.49e-08	1.6e-05
ENST00000515701.1	28.4139	-3.39739	0.628685	-5.40395	6.52e-08	1.6e-05
ENST00000588961.1	24.6869	-1.26391	0.234019	-5.4009	6.63e-08	1.63e-05
ENST00000570299.5	7.59327	-5.47691	1.01453	-5.39848	6.72e-08	1.65e-05
ENST00000372080.8	295.272	1.59255	0.295028	5.39796	6.74e-08	1.65e-05
ENST00000663257.1	42.4235	-1.81627	0.336619	-5.39562	6.83e-08	1.67e-05
ENST00000553645.7	1146.19	-0.655822	0.121568	-5.39468	6.86e-08	1.67e-05
ENST00000533000.5	8.58332	1.80674	0.334965	5.39381	6.9e-08	1.68e-05
ENST00000690027.2	7.95692	-2.7761	0.515048	-5.38998	7.05e-08	1.71e-05
ENST00000483201.1	43.8697	1.38044	0.256196	5.38823	7.12e-08	1.73e-05
ENST00000311713.11	98.7056	1.83179	0.339977	5.38798	7.13e-08	1.73e-05
ENST00000392097.5	691.146	-1.54886	0.287639	-5.38471	7.26e-08	1.76e-05
ENST00000605465.1	45.8488	-2.80869	0.521715	-5.38358	7.3e-08	1.76e-05
ENST00000429299.3	1219.53	1.63007	0.30279	5.38348	7.31e-08	1.76e-05
ENST00000284154.10	683.212	0.888668	0.16506	5.38389	7.29e-08	1.76e-05
ENST00000593677.2	412.261	2.68172	0.498222	5.38259	7.34e-08	1.77e-05
ENST00000432178.5	63.6956	3.18197	0.591231	5.38193	7.37e-08	1.77e-05
ENST00000359595.8	2761.17	1.59696	0.296756	5.3814	7.39e-08	1.77e-05
ENST00000570985.1	541.364	1.78883	0.332481	5.38025	7.44e-08	1.78e-05
ENST00000300692.9	787.728	1.51086	0.280861	5.3794	7.47e-08	1.79e-05
ENST00000670978.1	60.8714	1.0283	0.191166	5.37911	7.49e-08	1.79e-05
ENST00000627886.2	30.8761	1.475	0.274281	5.37769	7.54e-08	1.79e-05
ENST00000299961.5	14.7781	2.88908	0.537218	5.37785	7.54e-08	1.79e-05
ENST00000478686.1	9.51361	-2.92533	0.544006	-5.37738	7.56e-08	1.79e-05
ENST00000682873.1	266.457	-1.1957	0.222436	-5.37547	7.64e-08	1.81e-05
ENST00000477149.5	312.954	-1.14905	0.21398	-5.3699	7.88e-08	1.87e-05
ENST00000311832.6	1158.99	0.613017	0.114192	5.36832	7.95e-08	1.88e-05
ENST00000479249.5	66.7851	1.5842	0.295204	5.36645	8.03e-08	1.9e-05
ENST00000373109.7	5063.72	1.46918	0.273843	5.36504	8.09e-08	1.91e-05
ENST00000509305.6	12945.4	1.42144	0.265124	5.36143	8.26e-08	1.94e-05
ENST00000235332.6	1495.48	0.959081	0.17896	5.3592	8.36e-08	1.96e-05
ENST00000368328.5	599.852	1.21658	0.227056	5.35806	8.41e-08	1.97e-05
ENST00000263834.9	68.896	-2.46543	0.460298	-5.35616	8.5e-08	1.99e-05
ENST00000662380.1	223.644	-1.74496	0.325883	-5.35454	8.58e-08	2.01e-05
ENST00000602426.1	4.00287	1.37149	0.256202	5.35316	8.64e-08	2.02e-05
ENST00000572232.5	58.6768	1.70325	0.318203	5.3527	8.66e-08	2.02e-05
ENST00000505327.1	20.0708	1.75864	0.328608	5.3518	8.71e-08	2.03e-05
ENST00000455239.1	112.989	1.31966	0.246787	5.34736	8.92e-08	2.07e-05
ENST00000703010.1	2.91483	3.09459	0.57896	5.34508	9.04e-08	2.1e-05
ENST00000348462.6	26157.5	0.967997	0.181102	5.34502	9.04e-08	2.1e-05
ENST00000440766.5	28.5319	2.89091	0.540892	5.3447	9.06e-08	2.1e-05
ENST00000475977.2	15.6491	3.42252	0.640585	5.3428	9.15e-08	2.11e-05
ENST00000553875.5	66.2345	-1.43279	0.26824	-5.34143	9.22e-08	2.13e-05
ENST00000606273.3	109.242	1.50804	0.282656	5.33523	9.54e-08	2.2e-05
ENST00000532129.1	236.083	1.46235	0.274094	5.3352	9.54e-08	2.2e-05
ENST00000454076.5	28.3484	3.14959	0.590445	5.33426	9.59e-08	2.2e-05
ENST00000273668.7	231.49	1.08415	0.203269	5.33357	9.63e-08	2.21e-05
ENST00000613917.1	8.46223	-1.19101	0.223451	-5.3301	9.82e-08	2.25e-05
ENST00000297375.4	47.7252	2.41997	0.454381	5.32586	1e-07	2.29e-05
ENST00000343625.12	1207.83	1.18997	0.223426	5.326	1e-07	2.29e-05
ENST00000588090.5	52.1896	-2.80642	0.526987	-5.32541	1.01e-07	2.3e-05
ENST00000455503.2	49.0857	1.09776	0.206165	5.32466	1.01e-07	2.3e-05
ENST00000535993.1	54.3129	-2.01646	0.378872	-5.32229	1.02e-07	2.33e-05
ENST00000256257.2	499.439	0.558972	0.105069	5.32005	1.04e-07	2.35e-05
ENST00000270642.9	50.5163	1.77765	0.334159	5.31976	1.04e-07	2.35e-05
ENST00000625140.1	44.6074	-2.98403	0.561122	-5.31797	1.05e-07	2.37e-05
ENST00000637532.1	2.45752	2.3608	0.443928	5.31798	1.05e-07	2.37e-05
ENST00000431144.1	12.3595	1.18929	0.223684	5.31681	1.06e-07	2.38e-05
ENST00000555754.1	95.277	1.43666	0.270271	5.31563	1.06e-07	2.39e-05
ENST00000020926.8	2316.65	-2.55886	0.481413	-5.3153	1.06e-07	2.4e-05
ENST00000368034.9	112.73	1.12984	0.212633	5.31354	1.08e-07	2.41e-05
ENST00000443940.6	686.561	-1.17463	0.221069	-5.31343	1.08e-07	2.41e-05
ENST00000312648.8	568.395	1.65283	0.311074	5.31332	1.08e-07	2.41e-05
ENST00000349499.3	1872.83	-2.60866	0.491089	-5.31199	1.08e-07	2.43e-05
ENST00000508540.6	625.948	-2.21771	0.417542	-5.31134	1.09e-07	2.43e-05
ENST00000327490.8	2504.34	0.968257	0.182383	5.30892	1.1e-07	2.46e-05
ENST00000518750.1	1.69556	-2.6538	0.500108	-5.30646	1.12e-07	2.49e-05
ENST00000540869.5	45.9658	-1.51168	0.284877	-5.30642	1.12e-07	2.49e-05
ENST00000511430.1	55.1942	1.78062	0.335609	5.30565	1.12e-07	2.49e-05
ENST00000460627.5	259.2	-1.58245	0.298302	-5.30485	1.13e-07	2.5e-05
ENST00000502905.5	152.511	1.7911	0.33783	5.30178	1.15e-07	2.54e-05
ENST00000412663.5	41.7228	1.6934	0.319427	5.30136	1.15e-07	2.54e-05
ENST00000560081.5	18.0807	3.80422	0.717578	5.30147	1.15e-07	2.54e-05
ENST00000674423.1	6.5793	-1.64885	0.311044	-5.301	1.15e-07	2.54e-05
ENST00000474831.5	106.344	1.13758	0.214612	5.30065	1.15e-07	2.54e-05
ENST00000370009.5	1231.23	1.49238	0.281645	5.29878	1.17e-07	2.56e-05
ENST00000658968.1	4.46618	2.46861	0.465949	5.29803	1.17e-07	2.57e-05
ENST00000535480.1	303.665	2.53418	0.478479	5.29631	1.18e-07	2.59e-05
ENST00000534054.1	61.74	1.44048	0.272059	5.29474	1.19e-07	2.61e-05
ENST00000689936.1	135.299	1.38119	0.260891	5.29415	1.2e-07	2.61e-05
ENST00000471058.1	14.2201	2.37874	0.449469	5.29235	1.21e-07	2.64e-05
ENST00000333995.7	10.8957	3.29891	0.623387	5.29192	1.21e-07	2.64e-05
ENST00000593274.1	924.315	1.37723	0.260364	5.28965	1.23e-07	2.67e-05
ENST00000336230.10	49.4583	3.00653	0.568805	5.2857	1.25e-07	2.72e-05
ENST00000670026.1	63.3533	-1.90267	0.359978	-5.28551	1.25e-07	2.72e-05
ENST00000702555.1	25.4514	2.04572	0.387059	5.28528	1.26e-07	2.72e-05
ENST00000303757.12	36.4499	1.52419	0.288379	5.28536	1.25e-07	2.72e-05
ENST00000260126.9	145.47	1.32546	0.250879	5.28326	1.27e-07	2.74e-05
ENST00000376509.4	2367.2	1.24471	0.235648	5.28206	1.28e-07	2.76e-05
ENST00000460613.5	20.1939	-2.58158	0.488801	-5.28146	1.28e-07	2.76e-05
ENST00000682512.1	114.821	-1.4009	0.265241	-5.28163	1.28e-07	2.76e-05
ENST00000588144.2	11.3328	0.941921	0.178361	5.28097	1.28e-07	2.76e-05
ENST00000696453.2	227.463	-3.04955	0.577512	-5.2805	1.29e-07	2.76e-05
ENST00000477143.5	235.474	-1.39849	0.264844	-5.28042	1.29e-07	2.76e-05
ENST00000375105.8	427.058	2.40668	0.455846	5.27958	1.29e-07	2.77e-05
ENST00000432873.5	19.2119	2.00959	0.380753	5.27792	1.31e-07	2.79e-05
ENST00000532532.1	10.0711	-2.70394	0.512337	-5.27767	1.31e-07	2.79e-05
ENST00000268251.13	2210.17	-1.72081	0.32603	-5.27808	1.31e-07	2.79e-05
ENST00000392351.8	2858.73	1.15619	0.219124	5.27641	1.32e-07	2.8e-05
ENST00000381483.6	47.2222	-2.39283	0.453892	-5.27181	1.35e-07	2.87e-05
ENST00000606069.1	56.2056	1.56301	0.296663	5.26866	1.37e-07	2.92e-05
ENST00000703760.1	41.2491	-4.74365	0.900462	-5.26802	1.38e-07	2.92e-05
ENST00000526429.1	276.934	-1.91098	0.362753	-5.26799	1.38e-07	2.92e-05
ENST00000589670.5	56.8017	1.68926	0.320681	5.26773	1.38e-07	2.92e-05
ENST00000601797.1	98.7511	-1.30166	0.247115	-5.26744	1.38e-07	2.92e-05
ENST00000390549.6	247881	2.29414	0.435558	5.26712	1.39e-07	2.92e-05
ENST00000584284.5	70.1003	1.65917	0.315023	5.26681	1.39e-07	2.92e-05
ENST00000592376.1	22.1493	1.68041	0.319213	5.26423	1.41e-07	2.96e-05
ENST00000503038.1	257.966	-0.625682	0.118886	-5.26286	1.42e-07	2.98e-05
ENST00000053243.6	245.478	1.77535	0.337387	5.26206	1.42e-07	2.98e-05
ENST00000187762.7	502.419	1.34862	0.256289	5.2621	1.42e-07	2.98e-05
ENST00000265462.9	8938.03	0.897401	0.170556	5.26161	1.43e-07	2.99e-05
ENST00000617227.1	688.063	2.86608	0.544767	5.2611	1.43e-07	2.99e-05
ENST00000599035.1	22.3913	2.86038	0.543673	5.26122	1.43e-07	2.99e-05
ENST00000454385.8	30.708	1.54913	0.294508	5.26005	1.44e-07	3e-05
ENST00000609937.2	232.539	-1.5619	0.297177	-5.25579	1.47e-07	3.06e-05
ENST00000688132.1	36.3361	-3.85865	0.73441	-5.25408	1.49e-07	3.08e-05
ENST00000481582.5	10.7425	-4.80185	0.91389	-5.2543	1.49e-07	3.08e-05
ENST00000621510.1	69.5818	1.58249	0.301209	5.2538	1.49e-07	3.09e-05
ENST00000477599.5	174.138	1.11954	0.213195	5.25125	1.51e-07	3.11e-05
ENST00000392490.5	75.8215	-2.42659	0.462094	-5.25129	1.51e-07	3.11e-05
ENST00000311445.7	218.592	1.54423	0.294071	5.2512	1.51e-07	3.11e-05
ENST00000341642.9	347.999	-3.93921	0.750074	-5.25177	1.51e-07	3.11e-05
ENST00000690566.1	1.4195	3.4063	0.648751	5.25055	1.52e-07	3.12e-05
ENST00000558221.2	14.1417	2.07542	0.395286	5.25042	1.52e-07	3.12e-05
ENST00000417279.3	197.895	2.61942	0.498968	5.24967	1.52e-07	3.12e-05
ENST00000248437.9	2615.43	1.17563	0.22394	5.24975	1.52e-07	3.12e-05
ENST00000615438.4	59.1726	-2.15655	0.410785	-5.24983	1.52e-07	3.12e-05
ENST00000373093.4	55.2213	-2.56182	0.488267	-5.24677	1.55e-07	3.16e-05
ENST00000390392.3	25.5431	1.6544	0.315467	5.24427	1.57e-07	3.2e-05
ENST00000493218.5	959.601	2.49652	0.476078	5.24393	1.57e-07	3.2e-05
ENST00000390299.2	2722.39	2.41727	0.461285	5.2403	1.6e-07	3.26e-05
ENST00000252909.8	21.917	-2.15462	0.411236	-5.23937	1.61e-07	3.27e-05
ENST00000232892.12	38.2383	2.49366	0.476039	5.23834	1.62e-07	3.29e-05
ENST00000264605.8	1638.48	-1.83395	0.350201	-5.23685	1.63e-07	3.31e-05
ENST00000376782.6	138.669	1.20705	0.230493	5.23682	1.63e-07	3.31e-05
ENST00000392623.5	156.164	1.277	0.243946	5.23477	1.65e-07	3.34e-05
ENST00000368015.1	1828.29	1.75214	0.334704	5.23491	1.65e-07	3.34e-05
ENST00000606195.1	9.224	1.93641	0.369934	5.23447	1.65e-07	3.34e-05
ENST00000510758.1	3.99507	-4.63079	0.885	-5.23253	1.67e-07	3.37e-05
ENST00000659161.1	19.8343	-4.28607	0.81919	-5.23208	1.68e-07	3.37e-05
ENST00000681460.1	398.021	2.78838	0.532933	5.23215	1.68e-07	3.37e-05
ENST00000553694.5	191.44	-1.19558	0.228606	-5.22985	1.7e-07	3.4e-05
ENST00000606622.1	7.05778	-1.94575	0.372229	-5.22728	1.72e-07	3.45e-05
ENST00000596583.5	8.59825	1.76873	0.33839	5.22691	1.72e-07	3.45e-05
ENST00000417927.1	6.80114	2.19766	0.420714	5.22363	1.75e-07	3.51e-05
ENST00000567824.1	17.5022	-1.67306	0.320538	-5.21954	1.79e-07	3.58e-05
ENST00000322153.11	192.612	1.21665	0.233148	5.21838	1.8e-07	3.6e-05
ENST00000357066.8	3628.6	0.60412	0.115781	5.21779	1.81e-07	3.6e-05
ENST00000557762.1	5.3652	1.32611	0.254209	5.21661	1.82e-07	3.62e-05
ENST00000339276.6	4685.94	1.77606	0.340667	5.21347	1.85e-07	3.68e-05
ENST00000448281.7	3978.32	0.518767	0.0995452	5.21137	1.87e-07	3.72e-05
ENST00000602255.1	84.4677	1.37347	0.263729	5.2079	1.91e-07	3.78e-05
ENST00000334409.10	281.093	1.51307	0.290563	5.20736	1.92e-07	3.79e-05
ENST00000268720.9	123.714	-2.11029	0.405264	-5.20719	1.92e-07	3.79e-05
ENST00000482347.1	232.29	1.43096	0.274842	5.20648	1.92e-07	3.8e-05
ENST00000449683.5	76.8938	1.56144	0.299948	5.20569	1.93e-07	3.81e-05
ENST00000695537.1	141.896	1.79118	0.344103	5.20535	1.94e-07	3.81e-05
ENST00000302287.7	41.5883	-4.16589	0.800497	-5.20413	1.95e-07	3.83e-05
ENST00000394957.8	3086.03	0.902888	0.173525	5.20323	1.96e-07	3.84e-05
ENST00000248948.4	96.715	1.94501	0.373801	5.20334	1.96e-07	3.84e-05
ENST00000474993.5	141.034	1.65212	0.317631	5.20137	1.98e-07	3.87e-05
ENST00000541604.2	4.73223	-4.34358	0.835094	-5.2013	1.98e-07	3.87e-05
ENST00000587440.1	64.32	-2.36993	0.455709	-5.20054	1.99e-07	3.88e-05
ENST00000389341.9	700.684	1.0409	0.200173	5.19999	1.99e-07	3.89e-05
ENST00000444348.3	38.0531	1.13416	0.218127	5.19955	2e-07	3.89e-05
ENST00000484875.5	250.477	-2.17027	0.417528	-5.1979	2.02e-07	3.92e-05
ENST00000520521.1	13.8224	-1.06551	0.205031	-5.1968	2.03e-07	3.93e-05
ENST00000540112.1	1296.27	1.31943	0.25389	5.19687	2.03e-07	3.93e-05
ENST00000689579.2	175.355	-2.07464	0.39933	-5.19529	2.04e-07	3.96e-05
ENST00000352435.8	134.201	1.23339	0.237461	5.19406	2.06e-07	3.98e-05
ENST00000262352.8	1218.86	-1.71484	0.330223	-5.19299	2.07e-07	3.99e-05
ENST00000539196.2	525.381	1.31605	0.253423	5.1931	2.07e-07	3.99e-05
ENST00000555567.6	446.785	0.927207	0.178613	5.19114	2.09e-07	4.03e-05
ENST00000397261.8	8630.75	0.650011	0.125233	5.1904	2.1e-07	4.04e-05
ENST00000376266.9	2104.62	1.32943	0.256142	5.19023	2.1e-07	4.04e-05
ENST00000372836.5	4956.53	0.886169	0.170748	5.18991	2.1e-07	4.04e-05
ENST00000306390.7	1279.44	-1.80196	0.347347	-5.18777	2.13e-07	4.08e-05
ENST00000357701.6	33.6736	1.77399	0.341972	5.18754	2.13e-07	4.08e-05
ENST00000612353.4	126.332	1.2041	0.232132	5.18713	2.14e-07	4.09e-05
ENST00000482532.5	84.8356	-0.775348	0.149488	-5.18668	2.14e-07	4.09e-05
ENST00000542367.1	12.6377	-2.84456	0.548423	-5.1868	2.14e-07	4.09e-05
ENST00000490389.1	12.3891	-1.88966	0.36454	-5.1837	2.18e-07	4.15e-05
ENST00000334678.8	3409.71	0.902608	0.174286	5.17891	2.23e-07	4.25e-05
ENST00000440480.8	772.286	1.25063	0.241539	5.17773	2.25e-07	4.27e-05
ENST00000538009.5	51.8476	-1.57156	0.30355	-5.17728	2.25e-07	4.28e-05
ENST00000316423.11	3912.95	-1.04966	0.202793	-5.17602	2.27e-07	4.3e-05
ENST00000295101.3	406.041	-5.28861	1.02182	-5.17567	2.27e-07	4.3e-05
ENST00000507066.1	10.5802	-8.21717	1.58789	-5.17491	2.28e-07	4.31e-05
ENST00000697754.1	205.339	1.69886	0.328475	5.17197	2.32e-07	4.38e-05
ENST00000396057.6	4.32958	1.78109	0.344391	5.1717	2.32e-07	4.38e-05
ENST00000578067.5	388.655	1.15119	0.222769	5.16765	2.37e-07	4.47e-05
ENST00000602841.5	1240.31	1.2696	0.245737	5.1665	2.39e-07	4.49e-05
ENST00000488573.1	9.07158	-3.10254	0.600521	-5.16642	2.39e-07	4.49e-05
ENST00000259608.8	346.583	1.45315	0.28128	5.16619	2.39e-07	4.49e-05
ENST00000600395.5	75.9587	1.42867	0.276575	5.16556	2.4e-07	4.5e-05
ENST00000463670.5	292.858	2.05977	0.398886	5.16381	2.42e-07	4.53e-05
ENST00000442908.2	393.345	1.24814	0.241837	5.16109	2.46e-07	4.6e-05
ENST00000668520.1	1.26562	2.50786	0.486009	5.1601	2.47e-07	4.6e-05
ENST00000692806.1	37.6342	-2.88933	0.559928	-5.16019	2.47e-07	4.6e-05
ENST00000375068.6	14649.8	-1.31597	0.255014	-5.16038	2.46e-07	4.6e-05
ENST00000372079.1	25.5891	6.10066	1.18387	5.15316	2.56e-07	4.77e-05
ENST00000262848.6	2555.56	0.836976	0.162432	5.15277	2.57e-07	4.77e-05
ENST00000203629.3	448.029	1.73502	0.336842	5.15084	2.59e-07	4.82e-05
ENST00000583777.5	675.636	2.03169	0.394481	5.15028	2.6e-07	4.83e-05
ENST00000377953.4	1424.46	1.23446	0.23974	5.14918	2.62e-07	4.85e-05
ENST00000560153.2	68.1761	-4.07272	0.791185	-5.14762	2.64e-07	4.88e-05
ENST00000593795.5	219.489	1.17993	0.229309	5.1456	2.67e-07	4.93e-05
ENST00000216471.5	160.866	-1.06371	0.20674	-5.14515	2.67e-07	4.94e-05
ENST00000429872.2	83.1057	1.02392	0.19914	5.14173	2.72e-07	5.02e-05
ENST00000455452.5	843.166	0.848081	0.164943	5.14167	2.72e-07	5.02e-05
ENST00000582520.1	312.841	1.45254	0.282574	5.14038	2.74e-07	5.05e-05
ENST00000368199.8	325.209	1.21898	0.237149	5.14013	2.75e-07	5.05e-05
ENST00000559379.5	19.8847	-2.22921	0.433742	-5.13948	2.75e-07	5.06e-05
ENST00000587680.2	66.4878	-3.40975	0.6635	-5.13904	2.76e-07	5.06e-05
ENST00000647830.1	3.79268	2.74664	0.53467	5.13708	2.79e-07	5.11e-05
ENST00000527539.1	3.76309	2.06483	0.401982	5.13662	2.8e-07	5.12e-05
ENST00000522209.1	76.7976	2.08324	0.405672	5.13528	2.82e-07	5.15e-05
ENST00000549644.1	11.5525	-1.19261	0.23233	-5.13325	2.85e-07	5.2e-05
ENST00000396863.8	155.525	1.9873	0.387162	5.133	2.85e-07	5.2e-05
ENST00000379987.7	4287.05	-1.36948	0.26692	-5.13069	2.89e-07	5.25e-05
ENST00000215565.3	3752.85	1.11765	0.217826	5.13091	2.88e-07	5.25e-05
ENST00000494984.5	764.663	2.06822	0.403216	5.12933	2.91e-07	5.28e-05
ENST00000704703.1	59.8228	-7.06944	1.37843	-5.12863	2.92e-07	5.29e-05
ENST00000497377.6	2526.78	1.40711	0.274444	5.12712	2.94e-07	5.33e-05
ENST00000682188.1	17.3772	-7.26465	1.41747	-5.12507	2.97e-07	5.38e-05
ENST00000481187.5	144.075	0.960896	0.187623	5.12141	3.03e-07	5.48e-05
ENST00000548400.5	223.699	1.20474	0.235238	5.12134	3.03e-07	5.48e-05
ENST00000380200.3	13.5691	-4.24484	0.828877	-5.12119	3.04e-07	5.48e-05
ENST00000619483.4	313.964	-1.56283	0.305213	-5.12046	3.05e-07	5.49e-05
ENST00000440890.7	2360.3	-4.85445	0.948536	-5.11784	3.09e-07	5.56e-05
ENST00000265471.10	3003.35	1.02465	0.200247	5.11692	3.11e-07	5.58e-05
ENST00000409359.7	259.75	2.03901	0.398621	5.11517	3.13e-07	5.62e-05
ENST00000570103.5	63.8053	1.83346	0.358426	5.1153	3.13e-07	5.62e-05
ENST00000444472.5	116.571	1.38342	0.270639	5.11168	3.19e-07	5.72e-05
ENST00000450206.1	6.09371	1.6189	0.316751	5.11094	3.21e-07	5.73e-05
ENST00000329454.2	565.494	-2.53478	0.495977	-5.11068	3.21e-07	5.74e-05
ENST00000621439.5	176.817	-2.3525	0.460403	-5.10966	3.23e-07	5.76e-05
ENST00000504484.5	98.1036	-1.35265	0.26478	-5.10857	3.25e-07	5.79e-05
ENST00000407540.8	1047.28	-1.3936	0.272855	-5.10749	3.26e-07	5.81e-05
ENST00000528652.2	43.0799	1.2133	0.23755	5.10758	3.26e-07	5.81e-05
ENST00000405093.9	15.0184	2.44298	0.478478	5.10572	3.3e-07	5.85e-05
ENST00000514094.5	12.4063	-1.55649	0.304947	-5.10412	3.32e-07	5.9e-05
ENST00000259254.9	1919.11	0.905945	0.17753	5.10306	3.34e-07	5.92e-05
ENST00000560769.2	24.1586	-3.13937	0.615232	-5.10275	3.35e-07	5.92e-05
ENST00000531692.1	94.8806	1.55188	0.304121	5.10284	3.35e-07	5.92e-05
ENST00000691915.1	12.2435	1.52609	0.299233	5.1	3.4e-07	6e-05
ENST00000392035.6	878.072	0.984199	0.192998	5.09952	3.41e-07	6.01e-05
ENST00000702503.1	26.783	-1.59869	0.313559	-5.09852	3.42e-07	6.03e-05
ENST00000419007.5	160.532	-1.93171	0.378981	-5.09711	3.45e-07	6.07e-05
ENST00000426508.7	1660.6	-0.862439	0.169206	-5.09697	3.45e-07	6.07e-05
ENST00000477801.1	125.054	2.43672	0.478455	5.0929	3.53e-07	6.19e-05
ENST00000597229.2	4244.5	1.11663	0.219307	5.09165	3.55e-07	6.23e-05
ENST00000492217.1	17.0523	-0.763202	0.149941	-5.09001	3.58e-07	6.27e-05
ENST00000376693.3	366.35	1.35322	0.265895	5.08931	3.59e-07	6.29e-05
ENST00000446026.1	378.988	1.54277	0.303156	5.08903	3.6e-07	6.29e-05
ENST00000418189.5	10.0084	-2.56133	0.50354	-5.08664	3.64e-07	6.36e-05
ENST00000635017.1	23.1116	-1.89105	0.371817	-5.08597	3.66e-07	6.38e-05
ENST00000352131.7	251.059	1.58215	0.311122	5.08532	3.67e-07	6.39e-05
ENST00000369307.4	3060.93	1.02484	0.201594	5.08369	3.7e-07	6.44e-05
ENST00000398421.6	87.0476	1.27863	0.25152	5.08364	3.7e-07	6.44e-05
ENST00000298049.12	1519.26	-3.76632	0.740963	-5.083	3.72e-07	6.45e-05
ENST00000544886.6	53.9318	4.13315	0.813381	5.08144	3.75e-07	6.49e-05
ENST00000544835.7	85.384	3.46948	0.682734	5.08174	3.74e-07	6.49e-05
ENST00000594700.5	8.29566	1.77915	0.350135	5.08133	3.75e-07	6.49e-05
ENST00000462514.1	22.9613	1.4548	0.286317	5.08109	3.75e-07	6.49e-05
ENST00000380956.9	1424.98	1.572	0.309455	5.07991	3.78e-07	6.52e-05
ENST00000484197.5	344.276	1.69391	0.333506	5.0791	3.79e-07	6.54e-05
ENST00000558276.7	63.8788	1.22517	0.241223	5.07901	3.79e-07	6.54e-05
ENST00000597073.5	2042.98	1.3423	0.264342	5.07792	3.82e-07	6.57e-05
ENST00000247668.7	2400.24	0.833351	0.164232	5.07423	3.89e-07	6.69e-05
ENST00000478482.1	20.7553	-1.54623	0.304858	-5.07195	3.94e-07	6.75e-05
ENST00000263202.15	1403.59	0.883923	0.174278	5.07191	3.94e-07	6.75e-05
ENST00000622856.1	7.40531	1.46527	0.288922	5.07152	3.95e-07	6.76e-05
ENST00000372398.6	2375.51	0.765367	0.15093	5.071	3.96e-07	6.77e-05
ENST00000623134.1	50.2243	1.07322	0.211736	5.0687	4.01e-07	6.84e-05
ENST00000669282.1	5.34735	-4.03353	0.79579	-5.06859	4.01e-07	6.84e-05
ENST00000605886.1	331.47	-1.80819	0.356809	-5.06765	4.03e-07	6.87e-05
ENST00000355716.5	2692.35	0.945994	0.186804	5.0641	4.1e-07	6.99e-05
ENST00000259633.9	454.274	1.20005	0.236982	5.06388	4.11e-07	6.99e-05
ENST00000573053.5	419.354	1.5142	0.299027	5.06376	4.11e-07	6.99e-05
ENST00000656839.1	6.93376	2.45549	0.485094	5.06188	4.15e-07	7.05e-05
ENST00000695747.1	438.67	2.06759	0.408501	5.06141	4.16e-07	7.06e-05
ENST00000375225.7	423.49	1.49066	0.294561	5.06064	4.18e-07	7.08e-05
ENST00000339758.7	61.3358	-1.59916	0.316022	-5.06027	4.19e-07	7.08e-05
ENST00000250383.11	2376.42	-2.98079	0.589077	-5.06011	4.19e-07	7.08e-05
ENST00000553305.1	5.68892	-2.37022	0.468469	-5.0595	4.2e-07	7.1e-05
ENST00000429282.5	4.76042	2.67407	0.528611	5.05867	4.22e-07	7.12e-05
ENST00000568223.7	1173.82	-1.01891	0.201432	-5.05836	4.23e-07	7.12e-05
ENST00000567776.2	19.9432	-1.95669	0.38687	-5.05775	4.24e-07	7.14e-05
ENST00000377842.7	56.355	1.5104	0.29878	5.05522	4.3e-07	7.23e-05
ENST00000295055.12	1157.38	-1.7363	0.343512	-5.05457	4.31e-07	7.24e-05
ENST00000233143.6	57981.2	0.916473	0.181367	5.05315	4.35e-07	7.29e-05
ENST00000541294.1	178.97	-1.09454	0.216647	-5.05219	4.37e-07	7.32e-05
ENST00000651644.1	17.1743	-4.21431	0.834363	-5.05093	4.4e-07	7.36e-05
ENST00000356786.10	1354.92	1.28964	0.255344	5.05059	4.4e-07	7.36e-05
ENST00000337929.8	933.468	1.27247	0.251941	5.05065	4.4e-07	7.36e-05
ENST00000544306.5	8.0533	-4.55257	0.901521	-5.04987	4.42e-07	7.38e-05
ENST00000548503.1	93.008	-1.41266	0.279776	-5.04926	4.44e-07	7.39e-05
ENST00000479678.1	98.5548	1.32788	0.263002	5.04893	4.44e-07	7.4e-05
ENST00000376557.3	321.434	0.823566	0.163147	5.048	4.46e-07	7.42e-05
ENST00000608010.1	18.6561	1.50853	0.298945	5.04617	4.51e-07	7.49e-05
ENST00000598034.5	182.149	1.07004	0.212142	5.04397	4.56e-07	7.57e-05
ENST00000453452.1	224.776	1.95479	0.387639	5.0428	4.59e-07	7.6e-05
ENST00000648437.1	39074.3	0.794519	0.157637	5.04017	4.65e-07	7.7e-05
ENST00000519897.1	10.219	-4.59371	0.91168	-5.03873	4.69e-07	7.75e-05
ENST00000515730.1	32.1533	-0.822531	0.163258	-5.03822	4.7e-07	7.76e-05
ENST00000407997.4	1140.17	0.986167	0.195954	5.03264	4.84e-07	7.98e-05
ENST00000518301.1	19.994	2.56661	0.510086	5.03173	4.86e-07	8.01e-05
ENST00000491148.5	255.702	-4.29743	0.8544	-5.02976	4.91e-07	8.08e-05
ENST00000530666.1	132.316	1.37328	0.273034	5.02971	4.91e-07	8.08e-05
ENST00000624683.1	342.089	-0.982493	0.195386	-5.02848	4.94e-07	8.12e-05
ENST00000480181.1	23.7568	1.5987	0.318075	5.02616	5e-07	8.21e-05
ENST00000448659.1	117.005	-1.14827	0.228478	-5.02575	5.01e-07	8.22e-05
ENST00000514597.5	44.7215	-3.85442	0.766959	-5.02559	5.02e-07	8.22e-05
ENST00000347941.4	130.271	1.13187	0.225255	5.02483	5.04e-07	8.24e-05
ENST00000354050.8	232.451	1.55506	0.309471	5.02491	5.04e-07	8.24e-05
ENST00000215855.7	19.3317	1.67421	0.333253	5.02384	5.06e-07	8.27e-05
ENST00000541722.5	80.4652	-1.74995	0.348387	-5.023	5.09e-07	8.3e-05
ENST00000368910.4	520.268	0.912835	0.181796	5.0212	5.13e-07	8.36e-05
ENST00000257017.5	83.3116	1.01025	0.201193	5.02129	5.13e-07	8.36e-05
ENST00000454679.7	40.2349	-4.04622	0.805995	-5.02015	5.16e-07	8.4e-05
ENST00000496527.1	21.633	-1.74935	0.348525	-5.0193	5.19e-07	8.41e-05
ENST00000541233.1	125.251	2.22706	0.443695	5.01934	5.18e-07	8.41e-05
ENST00000306928.6	8.98263	2.68787	0.535719	5.01731	5.24e-07	8.49e-05
ENST00000466879.5	11.5985	-2.61714	0.521726	-5.01631	5.27e-07	8.52e-05
ENST00000372099.10	660.54	0.841982	0.167854	5.01616	5.27e-07	8.52e-05
ENST00000341846.10	3456.25	1.77806	0.354454	5.01634	5.27e-07	8.52e-05
ENST00000528852.5	59.7103	1.52966	0.304988	5.01546	5.29e-07	8.54e-05
ENST00000487026.5	110.473	1.10368	0.220077	5.01498	5.3e-07	8.55e-05
ENST00000324602.12	912.835	1.08154	0.215718	5.01366	5.34e-07	8.6e-05
ENST00000246532.6	456.697	1.02784	0.205065	5.01227	5.38e-07	8.66e-05
ENST00000453973.5	603.863	1.81331	0.361829	5.01151	5.4e-07	8.67e-05
ENST00000339399.5	9153.8	0.66523	0.132739	5.01157	5.4e-07	8.67e-05
ENST00000261267.7	27557.6	1.54044	0.307398	5.01123	5.41e-07	8.67e-05
ENST00000392795.7	320.435	1.82426	0.36423	5.00853	5.48e-07	8.79e-05
ENST00000312629.10	2713.01	0.976671	0.195033	5.00773	5.51e-07	8.82e-05
ENST00000526117.6	2132.8	-1.40342	0.28031	-5.00665	5.54e-07	8.86e-05
ENST00000592195.1	39.9376	-1.51081	0.30184	-5.00535	5.58e-07	8.9e-05
ENST00000370085.3	73.0848	1.38508	0.276728	5.00521	5.58e-07	8.9e-05
ENST00000352271.6	7.285	1.67163	0.334051	5.00411	5.61e-07	8.95e-05
ENST00000597985.5	375.676	1.48355	0.296493	5.00365	5.63e-07	8.96e-05
ENST00000476886.5	7.08347	-2.74918	0.549522	-5.00285	5.65e-07	8.99e-05
ENST00000578168.1	28.8083	3.60325	0.720602	5.00033	5.72e-07	9.08e-05
ENST00000493556.2	15.3135	-1.17796	0.235569	-5.00049	5.72e-07	9.08e-05
ENST00000332281.6	138.583	0.98358	0.19672	4.9999	5.74e-07	9.1e-05
ENST00000696269.1	104.79	1.30596	0.261267	4.99855	5.78e-07	9.12e-05
ENST00000281938.7	1772.37	-1.64809	0.329678	-4.99909	5.76e-07	9.12e-05
ENST00000590905.1	45.1331	-3.08454	0.617094	-4.99849	5.78e-07	9.12e-05
ENST00000587298.2	129.939	2.09529	0.41916	4.99879	5.77e-07	9.12e-05
ENST00000434216.2	118.689	-0.832858	0.166624	-4.99843	5.78e-07	9.12e-05
ENST00000374163.5	353.911	1.30365	0.260827	4.99813	5.79e-07	9.12e-05
ENST00000684658.1	87.8111	-1.04197	0.208497	-4.99752	5.81e-07	9.14e-05
ENST00000655377.1	13.2786	-1.52045	0.304272	-4.99701	5.82e-07	9.16e-05
ENST00000592657.1	221.092	-2.10265	0.420844	-4.99626	5.85e-07	9.18e-05
ENST00000444374.2	18.1716	2.26698	0.453844	4.99506	5.88e-07	9.23e-05
ENST00000624615.1	54.6792	-1.80725	0.361964	-4.9929	5.95e-07	9.32e-05
ENST00000532507.5	1054.99	1.92227	0.384997	4.99294	5.95e-07	9.32e-05
ENST00000426712.1	277.865	1.57442	0.315387	4.992	5.98e-07	9.33e-05
ENST00000434436.8	115.062	0.75525	0.151281	4.99238	5.96e-07	9.33e-05
ENST00000594958.1	23.643	1.52496	0.305481	4.99201	5.98e-07	9.33e-05
ENST00000679217.1	135.407	1.402	0.280864	4.99174	5.98e-07	9.33e-05
ENST00000353809.9	30.9764	3.23061	0.647288	4.99099	6.01e-07	9.36e-05
ENST00000566280.1	14.2677	-1.27789	0.256084	-4.99014	6.03e-07	9.39e-05
ENST00000393409.3	7641.36	0.570531	0.114346	4.98951	6.05e-07	9.41e-05
ENST00000474490.1	109.097	3.09269	0.620038	4.9879	6.1e-07	9.48e-05
ENST00000303843.7	1300.49	-1.1366	0.227944	-4.98634	6.15e-07	9.55e-05
ENST00000464611.1	19518.2	2.04348	0.40984	4.98605	6.16e-07	9.56e-05
ENST00000619426.5	4654.58	0.78721	0.157902	4.98544	6.18e-07	9.58e-05
ENST00000612531.1	16.5744	1.41682	0.284256	4.98431	6.22e-07	9.62e-05
ENST00000656494.1	10.82	-2.33331	0.468319	-4.9823	6.28e-07	9.71e-05
ENST00000452271.7	409.933	2.91151	0.584594	4.98039	6.35e-07	9.8e-05
ENST00000414696.5	192.117	-1.82743	0.3671	-4.97801	6.42e-07	9.91e-05
ENST00000585950.5	13.3813	-4.38874	0.881733	-4.9774	6.44e-07	9.93e-05
ENST00000688110.1	22.9753	1.36942	0.275151	4.97697	6.46e-07	9.94e-05
ENST00000483974.5	181.923	-2.06314	0.414678	-4.97528	6.52e-07	0.00010021
ENST00000472924.1	366.029	0.741971	0.149156	4.97446	6.54e-07	0.00010054
ENST00000688539.2	42.5674	1.51021	0.303694	4.9728	6.6e-07	0.0001012
ENST00000651122.1	160.318	1.57553	0.316824	4.97288	6.6e-07	0.0001012
ENST00000439199.1	30.8208	1.05684	0.212648	4.9699	6.7e-07	0.00010262
ENST00000690168.2	22.1872	1.31454	0.264547	4.96902	6.73e-07	0.00010272
ENST00000425887.2	255.463	-2.57667	0.518541	-4.96908	6.73e-07	0.00010272
ENST00000373408.4	1137.66	1.09853	0.221067	4.96922	6.72e-07	0.00010272
ENST00000308521.10	537.589	0.815821	0.164184	4.96896	6.73e-07	0.00010272
ENST00000373582.4	364.157	1.07712	0.216792	4.96844	6.75e-07	0.00010279
ENST00000374660.7	2442.57	-2.68458	0.540317	-4.96853	6.75e-07	0.00010279
ENST00000666504.1	215.631	-0.820217	0.165166	-4.96601	6.83e-07	0.00010398
ENST00000659554.1	5.1884	1.36484	0.274862	4.96556	6.85e-07	0.00010411
ENST00000640870.1	22.6165	0.943994	0.190257	4.96166	6.99e-07	0.00010612
ENST00000691656.2	67.3304	1.10745	0.223214	4.96139	7e-07	0.00010616
ENST00000497304.6	30.7137	4.31863	0.870582	4.96062	7.03e-07	0.00010648
ENST00000371506.7	81.8841	-2.30444	0.464751	-4.95843	7.11e-07	0.00010758
ENST00000482103.1	84.8395	1.08477	0.218786	4.95813	7.12e-07	0.00010764
ENST00000543375.5	6.71036	3.6149	0.729196	4.95738	7.15e-07	0.00010795
ENST00000361677.6	2015.96	-0.653755	0.13188	-4.95719	7.15e-07	0.00010795
ENST00000245407.8	779.254	-0.998919	0.201544	-4.95634	7.18e-07	0.00010832
ENST00000419814.1	156.216	-3.98143	0.803361	-4.95596	7.2e-07	0.00010842
ENST00000444046.5	118.809	-4.07799	0.822949	-4.95533	7.22e-07	0.00010867
ENST00000455309.2	28.5084	1.17438	0.237028	4.95462	7.25e-07	0.00010885
ENST00000520536.1	456.685	1.41349	0.285314	4.95416	7.26e-07	0.00010885
ENST00000683872.1	29.6827	-2.01986	0.407715	-4.9541	7.27e-07	0.00010885
ENST00000460357.1	370.863	-0.785473	0.15853	-4.95474	7.24e-07	0.00010885
ENST00000292879.9	118.29	1.34183	0.270855	4.95405	7.27e-07	0.00010885
ENST00000225538.4	170.92	1.55794	0.314545	4.95298	7.31e-07	0.00010935
ENST00000244869.3	127.278	-2.40623	0.485946	-4.95163	7.36e-07	0.00011
ENST00000409144.5	132.126	1.75452	0.354432	4.95021	7.41e-07	0.0001107
ENST00000325455.10	2655.21	-2.08738	0.421832	-4.94836	7.48e-07	0.00011165
ENST00000484566.5	1523.13	1.46401	0.295953	4.94676	7.55e-07	0.00011246
ENST00000602368.1	56.1883	1.76562	0.356982	4.94597	7.58e-07	0.00011281
ENST00000460428.5	86.8582	1.57814	0.319145	4.9449	7.62e-07	0.00011324
ENST00000702034.1	11.1091	2.16735	0.438304	4.94485	7.62e-07	0.00011324
ENST00000461272.5	108.63	0.717047	0.1451	4.94174	7.74e-07	0.00011495
ENST00000591022.6	893.051	-0.665107	0.134657	-4.93928	7.84e-07	0.0001163
ENST00000311208.13	15667.6	2.10931	0.427139	4.93822	7.88e-07	0.00011682
ENST00000468494.1	1164.29	1.98159	0.401338	4.93747	7.91e-07	0.00011711
ENST00000444095.3	237.903	1.12018	0.226878	4.93737	7.92e-07	0.00011711
ENST00000222823.9	1131.12	0.479726	0.0971847	4.93623	7.96e-07	0.00011768
ENST00000607752.1	5.28903	-1.55827	0.315703	-4.93589	7.98e-07	0.00011777
ENST00000221801.8	5039.12	0.909218	0.184239	4.93498	8.02e-07	0.0001182
ENST00000600723.1	88.0751	1.05178	0.21314	4.93471	8.03e-07	0.00011826
ENST00000512534.5	463.705	-0.735882	0.149134	-4.93437	8.04e-07	0.00011835
ENST00000378406.5	375.612	0.873078	0.176962	4.9337	8.07e-07	0.00011864
ENST00000451639.1	4.76193	-2.7015	0.547726	-4.9322	8.13e-07	0.00011944
ENST00000465238.5	238.733	2.27221	0.461472	4.92384	8.49e-07	0.00012442
ENST00000484475.5	44.7138	1.26122	0.256141	4.92393	8.48e-07	0.00012442
ENST00000478899.1	242.514	2.12665	0.431998	4.92283	8.53e-07	0.00012483
ENST00000592388.1	14.475	3.4108	0.692844	4.9229	8.53e-07	0.00012483
ENST00000416248.5	3.33637	-2.4747	0.50275	-4.92232	8.55e-07	0.00012492
ENST00000264428.9	295.819	-1.24772	0.253482	-4.92233	8.55e-07	0.00012492
ENST00000521362.1	9.85299	4.5055	0.915543	4.92113	8.6e-07	0.00012556
ENST00000495029.1	19.8622	1.67885	0.34117	4.92087	8.62e-07	0.00012561
ENST00000672226.1	206.217	1.06986	0.217475	4.91948	8.68e-07	0.00012638
ENST00000380907.3	18.141	-2.13555	0.434249	-4.9178	8.75e-07	0.00012735
ENST00000465773.1	8.31657	1.85785	0.37783	4.91716	8.78e-07	0.00012765
ENST00000594473.1	29.4519	-1.45466	0.29591	-4.91587	8.84e-07	0.00012837
ENST00000470432.5	322.043	-1.21621	0.247433	-4.91531	8.86e-07	0.00012847
ENST00000366933.5	135.931	-1.11341	0.226526	-4.91513	8.87e-07	0.00012847
ENST00000226279.8	848.385	1.45499	0.296021	4.91517	8.87e-07	0.00012847
ENST00000243501.10	2219.47	-0.592077	0.120464	-4.91499	8.88e-07	0.00012847
ENST00000314529.10	143.291	-0.730641	0.148713	-4.91308	8.97e-07	0.00012935
ENST00000383729.9	1148.66	-0.8782	0.178736	-4.91339	8.95e-07	0.00012935
ENST00000609403.1	2.03082	1.51566	0.308486	4.91321	8.96e-07	0.00012935
ENST00000312579.4	2310.02	1.01675	0.206962	4.91274	8.98e-07	0.00012946
ENST00000382849.2	14.454	-1.39999	0.28505	-4.91138	9.04e-07	0.00013024
ENST00000489665.1	9.79066	-1.87159	0.38129	-4.90858	9.17e-07	0.00013198
ENST00000443998.1	97.0222	1.15109	0.234535	4.90796	9.2e-07	0.00013221
ENST00000312397.10	4501.25	0.706044	0.143859	4.90788	9.21e-07	0.00013221
ENST00000304887.6	13.3718	-3.78663	0.77178	-4.90636	9.28e-07	0.00013312
ENST00000294016.8	2073.07	-0.674688	0.137536	-4.90555	9.32e-07	0.00013354
ENST00000495688.5	136.352	2.20525	0.449563	4.90532	9.33e-07	0.00013358
ENST00000590986.5	766.443	-2.2148	0.45161	-4.90422	9.38e-07	0.00013407
ENST00000252675.6	11.9289	2.91111	0.593574	4.90437	9.37e-07	0.00013407
ENST00000287957.5	2790.98	-0.404778	0.0825578	-4.90297	9.44e-07	0.00013481
ENST00000453321.8	394.571	-0.794379	0.162035	-4.90251	9.46e-07	0.000135
ENST00000378566.5	701.013	0.705138	0.143858	4.90163	9.5e-07	0.00013548
ENST00000377960.9	3246.95	1.02136	0.20839	4.90117	9.53e-07	0.00013564
ENST00000562067.5	27.0572	2.4887	0.507791	4.90103	9.53e-07	0.00013564
ENST00000473866.1	14.562	-3.04333	0.621012	-4.9006	9.55e-07	0.00013569
ENST00000621098.1	8.67682	-2.02771	0.41376	-4.90069	9.55e-07	0.00013569
ENST00000371930.5	837.086	1.17021	0.238799	4.9004	9.56e-07	0.0001357
ENST00000347546.8	2863.93	-0.911512	0.186017	-4.90015	9.58e-07	0.00013574
ENST00000466425.1	652.91	1.19517	0.243916	4.8999	9.59e-07	0.00013579
ENST00000617316.2	1128.19	1.13801	0.232307	4.89873	9.65e-07	0.00013648
ENST00000691154.1	6.65239	-1.6119	0.329065	-4.89842	9.66e-07	0.00013657
ENST00000535078.2	38.8151	0.968661	0.197772	4.89786	9.69e-07	0.00013683
ENST00000623716.1	8.17266	1.75692	0.358949	4.89461	9.85e-07	0.00013899
ENST00000608023.5	2561.61	-1.03937	0.212399	-4.89348	9.91e-07	0.0001394
ENST00000702982.1	162.453	1.73273	0.35408	4.89359	9.9e-07	0.0001394
ENST00000623994.1	193.66	-0.740348	0.151282	-4.89382	9.89e-07	0.0001394
ENST00000414935.1	366.308	-3.03635	0.620543	-4.89306	9.93e-07	0.00013947
ENST00000372994.2	2446.24	0.873378	0.178495	4.89303	9.93e-07	0.00013947
ENST00000696169.1	565.425	0.908028	0.185613	4.89205	9.98e-07	0.00014003
ENST00000537505.6	6020.29	-0.872905	0.178564	-4.88849	1.02e-06	0.00014246
ENST00000651168.1	468.479	-3.83983	0.785639	-4.88752	1.02e-06	0.00014303
ENST00000464553.2	51.817	1.36034	0.278349	4.88716	1.02e-06	0.00014316
ENST00000369478.4	2163.54	1.33008	0.272249	4.88555	1.03e-06	0.00014421
ENST00000255082.8	90.59	1.8123	0.370987	4.88508	1.03e-06	0.00014442
ENST00000528930.6	189.407	1.22965	0.251784	4.88375	1.04e-06	0.00014514
ENST00000352551.9	83.8383	2.17513	0.445368	4.8839	1.04e-06	0.00014514
ENST00000555848.1	6079.62	-1.14124	0.233702	-4.88332	1.04e-06	0.00014532
ENST00000206249.8	9946.34	-2.39357	0.490199	-4.88286	1.05e-06	0.00014553
ENST00000415949.5	541.774	0.980954	0.200916	4.88242	1.05e-06	0.00014572
ENST00000367948.7	78.2274	-2.31185	0.473558	-4.88187	1.05e-06	0.00014586
ENST00000545526.1	31.5741	1.35337	0.277215	4.88202	1.05e-06	0.00014586
ENST00000559786.1	30.0383	1.11907	0.229258	4.88128	1.05e-06	0.00014617
ENST00000687895.2	6.70647	1.67736	0.343678	4.8806	1.06e-06	0.00014654
ENST00000544831.5	243.234	1.1805	0.241923	4.87966	1.06e-06	0.00014711
ENST00000563162.1	8.36906	-1.29221	0.26488	-4.8785	1.07e-06	0.00014785
ENST00000493000.5	51.5342	-2.87903	0.590256	-4.87759	1.07e-06	0.00014812
ENST00000369701.8	13.4851	-2.28832	0.469141	-4.87769	1.07e-06	0.00014812
ENST00000351559.10	2198.6	-2.01314	0.412728	-4.87765	1.07e-06	0.00014812
ENST00000480772.1	316.686	1.52085	0.311867	4.87659	1.08e-06	0.00014861
ENST00000376621.8	3263.79	0.734798	0.150675	4.87672	1.08e-06	0.00014861
ENST00000528419.6	112.979	1.46847	0.301152	4.87619	1.08e-06	0.00014878
ENST00000461472.1	25.4878	-2.52171	0.517182	-4.87588	1.08e-06	0.00014888
ENST00000641837.1	234.125	1.69802	0.3484	4.87377	1.09e-06	0.00015035
ENST00000319041.6	179.083	0.700053	0.143658	4.87304	1.1e-06	0.00015052
ENST00000361763.9	1799.26	1.37149	0.28143	4.8733	1.1e-06	0.00015052
ENST00000550948.2	2340.05	0.994567	0.204097	4.87301	1.1e-06	0.00015052
ENST00000674939.1	13.2968	1.98362	0.407118	4.87234	1.1e-06	0.0001509
ENST00000390555.3	155.256	2.01024	0.412648	4.87156	1.11e-06	0.00015123
ENST00000471648.3	1.77806	2.90235	0.595758	4.87168	1.11e-06	0.00015123
ENST00000441915.5	308.026	-1.69775	0.348589	-4.87034	1.11e-06	0.00015189
ENST00000381469.7_PAR_Y	30.3834	1.26312	0.259347	4.87039	1.11e-06	0.00015189
ENST00000487614.1	21.3795	0.939095	0.192833	4.86998	1.12e-06	0.00015198
ENST00000685108.1	12.4579	1.50331	0.308697	4.86985	1.12e-06	0.00015198
ENST00000589728.1	32.9661	-2.73259	0.561141	-4.86971	1.12e-06	0.00015198
ENST00000370709.4	7.36837	2.69384	0.553214	4.86944	1.12e-06	0.00015205
ENST00000592205.5	28.5907	-1.80385	0.370533	-4.86824	1.13e-06	0.00015284
ENST00000487899.1	89.3081	-0.795048	0.163323	-4.86794	1.13e-06	0.00015294
ENST00000476890.1	36.0843	1.02908	0.211418	4.86753	1.13e-06	0.00015312
ENST00000461794.1	95.8042	-0.94619	0.194431	-4.86646	1.14e-06	0.00015381
ENST00000476410.1	33.3914	1.26047	0.259042	4.8659	1.14e-06	0.00015411
ENST00000468353.1	2.22349	-2.88193	0.592382	-4.86499	1.14e-06	0.00015462
ENST00000569591.3	2275.42	1.34674	0.276828	4.8649	1.15e-06	0.00015462
ENST00000529768.5	109.111	1.34391	0.276402	4.86217	1.16e-06	0.00015663
ENST00000374948.6	287.782	2.13664	0.4395	4.86153	1.16e-06	0.00015701
ENST00000511988.5	19.51	-1.58837	0.326781	-4.86066	1.17e-06	0.00015755
ENST00000356433.10	27.7449	1.77085	0.364365	4.86009	1.17e-06	0.00015787
ENST00000645367.1	48.8844	-1.09541	0.225412	-4.85957	1.18e-06	0.00015815
ENST00000622718.1	14.4647	1.57138	0.323448	4.8582	1.18e-06	0.00015869
ENST00000513572.3	34.4124	-2.51873	0.518393	-4.85872	1.18e-06	0.00015869
ENST00000544101.1	219.07	1.83656	0.378027	4.85829	1.18e-06	0.00015869
ENST00000575305.1	224.97	-0.782095	0.160984	-4.85821	1.18e-06	0.00015869
ENST00000528793.5	2098.25	0.679584	0.139921	4.85691	1.19e-06	0.00015959
ENST00000318881.11	164.752	-2.54675	0.524375	-4.85672	1.19e-06	0.0001596
ENST00000472852.2	45.9729	1.20603	0.248386	4.85545	1.2e-06	0.00016049
ENST00000531415.1	108.132	1.39995	0.28836	4.85487	1.2e-06	0.00016082
ENST00000642527.1	388.147	-3.20462	0.660142	-4.85444	1.21e-06	0.00016103
ENST00000653647.1	17.4467	1.76132	0.362882	4.85369	1.21e-06	0.0001615
ENST00000706788.1	508.645	1.40437	0.289379	4.85304	1.22e-06	0.00016189
ENST00000451188.7	11.0924	1.2951	0.266889	4.85259	1.22e-06	0.00016194
ENST00000304677.3	1111.29	0.935991	0.19289	4.85247	1.22e-06	0.00016194
ENST00000563605.1	56.5223	1.46441	0.301776	4.85263	1.22e-06	0.00016194
ENST00000523086.5	179.04	1.02937	0.212179	4.85144	1.23e-06	0.00016263
ENST00000371738.4	407.783	0.84366	0.173904	4.85128	1.23e-06	0.00016263
ENST00000691036.1	1089.64	1.14905	0.236888	4.85059	1.23e-06	0.00016306
ENST00000630147.1	1012.04	1.70065	0.350646	4.85003	1.23e-06	0.00016337
ENST00000528105.5	84.7811	1.05449	0.217437	4.84963	1.24e-06	0.00016356
ENST00000429437.5	3524.57	0.73339	0.151283	4.84779	1.25e-06	0.00016495
ENST00000566354.1	2074.74	0.831769	0.171618	4.84664	1.26e-06	0.00016576
ENST00000656562.1	145.469	-1.13935	0.235101	-4.84621	1.26e-06	0.00016598
ENST00000249071.11	3212.46	0.94627	0.195295	4.84533	1.26e-06	0.00016658
ENST00000370056.9	5269.49	-1.09205	0.225416	-4.84458	1.27e-06	0.00016706
ENST00000682175.1	56.4539	-1.16587	0.240703	-4.84362	1.27e-06	0.00016773
ENST00000265598.8	1289.73	1.38465	0.285994	4.84153	1.29e-06	0.00016923
ENST00000498016.1	22.5333	-1.68805	0.348662	-4.84151	1.29e-06	0.00016923
ENST00000264360.7	51.0882	-2.15405	0.445004	-4.84052	1.3e-06	0.00016991
ENST00000263379.4	2107.77	1.17577	0.242908	4.84037	1.3e-06	0.00016991
ENST00000409520.7	105.229	1.27914	0.264294	4.83985	1.3e-06	0.00017021
ENST00000262866.9	412.798	1.11695	0.2308	4.83949	1.3e-06	0.00017037
ENST00000452600.1	103.573	-2.30778	0.476898	-4.83916	1.3e-06	0.00017051
ENST00000468709.5	423.864	1.39848	0.289003	4.83898	1.31e-06	0.00017053
ENST00000619053.2	9.64688	1.06648	0.220412	4.83858	1.31e-06	0.00017072
ENST00000589332.7	269.788	-0.728976	0.150707	-4.83705	1.32e-06	0.0001719
ENST00000201979.3	192.835	1.07354	0.221979	4.83622	1.32e-06	0.00017246
ENST00000461757.1	1326.92	1.40723	0.291039	4.83519	1.33e-06	0.00017299
ENST00000643049.2	1852.58	1.88611	0.390086	4.83511	1.33e-06	0.00017299
ENST00000653667.1	186.294	-0.500098	0.103427	-4.8353	1.33e-06	0.00017299
ENST00000691438.1	5.22805	-3.05893	0.632792	-4.83402	1.34e-06	0.00017379
ENST00000160262.10	789.817	1.32783	0.27472	4.83339	1.34e-06	0.0001742
ENST00000373474.9	673.328	-1.60075	0.331224	-4.83285	1.35e-06	0.00017453
ENST00000382065.8	281.07	-1.1276	0.233344	-4.83233	1.35e-06	0.00017476
ENST00000638316.1	3.34037	-2.58951	0.535882	-4.83225	1.35e-06	0.00017476
ENST00000474100.1	420.097	1.27813	0.264536	4.8316	1.35e-06	0.00017503
ENST00000493479.1	9.05491	1.14683	0.237358	4.83165	1.35e-06	0.00017503
ENST00000522546.1	26.66	2.36956	0.490569	4.83023	1.36e-06	0.00017598
ENST00000559802.1	8.77569	-1.9339	0.400378	-4.83019	1.36e-06	0.00017598
ENST00000538922.8	249.394	2.08357	0.431429	4.82946	1.37e-06	0.00017648
ENST00000682438.1	250.865	-1.12302	0.232628	-4.82752	1.38e-06	0.00017806
ENST00000359637.3	19.9889	-5.32725	1.1038	-4.82627	1.39e-06	0.00017903
ENST00000685750.1	5.17253	1.11952	0.232012	4.82529	1.4e-06	0.00017976
ENST00000234371.10	78.5335	-2.40251	0.497984	-4.82447	1.4e-06	0.00018035
ENST00000375980.9	4449.57	0.638026	0.132253	4.82428	1.41e-06	0.00018037
ENST00000512334.5	319.638	2.13005	0.441747	4.82189	1.42e-06	0.00018239
ENST00000331035.10	285.42	0.800517	0.166026	4.82164	1.42e-06	0.00018247
ENST00000426367.1	8.71945	1.14123	0.236746	4.82047	1.43e-06	0.00018339
ENST00000486668.5	34.513	1.85552	0.385007	4.81945	1.44e-06	0.00018383
ENST00000234142.9	2828.58	-2.16389	0.448988	-4.81948	1.44e-06	0.00018383
ENST00000592610.1	46.2898	-1.9096	0.396238	-4.81933	1.44e-06	0.00018383
ENST00000289373.5	277.06	1.74999	0.36309	4.81971	1.44e-06	0.00018383
ENST00000335503.3	241.759	1.06343	0.220734	4.81771	1.45e-06	0.00018518
ENST00000432832.6	11.6128	-4.36707	0.906644	-4.81674	1.46e-06	0.00018592
ENST00000467930.1	225.493	0.850461	0.176658	4.81417	1.48e-06	0.00018802
ENST00000008180.13	233.945	1.14949	0.238767	4.81425	1.48e-06	0.00018802
ENST00000338492.9	258.014	1.39441	0.289696	4.81335	1.48e-06	0.00018848
ENST00000437418.1	25.3415	0.839294	0.174364	4.81346	1.48e-06	0.00018848
ENST00000203556.9	2352.74	0.656152	0.136354	4.81213	1.49e-06	0.00018948
ENST00000340758.7	6.98526	-4.25422	0.884635	-4.80901	1.52e-06	0.0001923
ENST00000426923.2	16.0805	1.79798	0.37398	4.80768	1.53e-06	0.00019342
ENST00000427043.4	1363.21	3.16255	0.65784	4.80748	1.53e-06	0.00019346
ENST00000483216.1	25.0329	-1.16563	0.242517	-4.80638	1.54e-06	0.0001942
ENST00000620143.1	19.4618	1.10402	0.229692	4.80654	1.54e-06	0.0001942
ENST00000487535.5	126.491	1.35511	0.281962	4.80601	1.54e-06	0.0001944
ENST00000304552.5	454.33	1.29766	0.270108	4.80423	1.55e-06	0.00019566
ENST00000691896.2	25.8098	-1.69968	0.353768	-4.80449	1.55e-06	0.00019566
ENST00000431809.5	43.3564	-3.01537	0.627642	-4.80429	1.55e-06	0.00019566
ENST00000430537.1	7.8851	1.13195	0.235642	4.80368	1.56e-06	0.00019604
ENST00000473911.1	22.5985	1.35109	0.281278	4.80341	1.56e-06	0.00019614
ENST00000375167.1	326.521	1.02926	0.214289	4.80313	1.56e-06	0.00019626
ENST00000428639.1	10.8111	-2.21765	0.461765	-4.80256	1.57e-06	0.00019665
ENST00000505302.1	44.1187	-4.1561	0.865476	-4.8021	1.57e-06	0.00019678
ENST00000457950.5	35.1219	2.14577	0.446829	4.80222	1.57e-06	0.00019678
ENST00000269466.8	303.233	0.66789	0.139088	4.80192	1.57e-06	0.0001968
ENST00000567659.3	14.7579	-2.10326	0.438021	-4.80173	1.57e-06	0.00019683
ENST00000502320.2	137.038	-1.28023	0.266639	-4.80137	1.58e-06	0.00019686
ENST00000438763.7	432.729	1.23209	0.256613	4.80137	1.58e-06	0.00019686
ENST00000437406.1	2369.73	0.992079	0.206794	4.79742	1.61e-06	0.00020057
ENST00000625132.1	414.282	-1.78178	0.371425	-4.79715	1.61e-06	0.00020057
ENST00000483931.1	10.4463	-1.81991	0.379373	-4.79714	1.61e-06	0.00020057
ENST00000398484.6	197.97	-1.20338	0.250874	-4.79676	1.61e-06	0.0002008
ENST00000177694.2	211.959	1.28427	0.267762	4.79633	1.62e-06	0.00020106
ENST00000447204.6	523.072	1.04671	0.218262	4.79565	1.62e-06	0.00020158
ENST00000681537.1	831.385	1.8477	0.385346	4.7949	1.63e-06	0.00020217
ENST00000703011.1	13.5646	3.00402	0.626638	4.79387	1.64e-06	0.00020296
ENST00000534552.1	101.574	1.66546	0.347421	4.79379	1.64e-06	0.00020296
ENST00000590545.5	17.453	-1.45161	0.302826	-4.79354	1.64e-06	0.00020306
ENST00000558156.1	21.5231	-1.6883	0.352262	-4.79274	1.65e-06	0.0002037
ENST00000314527.9	232.755	1.19562	0.249539	4.79132	1.66e-06	0.00020492
ENST00000565298.5	365.082	-1.01229	0.211281	-4.79122	1.66e-06	0.00020492
ENST00000409236.6	1019.6	-2.24164	0.467953	-4.79031	1.67e-06	0.00020564
ENST00000593775.5	40.7151	2.14541	0.447875	4.79019	1.67e-06	0.00020564
ENST00000374142.9	2931.99	0.584951	0.122159	4.78845	1.68e-06	0.00020727
ENST00000418130.1	24.8	-2.48983	0.520057	-4.78761	1.69e-06	0.00020783
ENST00000352327.5	262.71	0.69925	0.14606	4.78743	1.69e-06	0.00020783
ENST00000381894.3	126.816	0.977918	0.204266	4.78748	1.69e-06	0.00020783
ENST00000436782.5	653.088	3.44144	0.719097	4.78579	1.7e-06	0.0002092
ENST00000390290.3	1847.96	2.28211	0.47685	4.7858	1.7e-06	0.0002092
ENST00000464034.5	185.007	4.22788	0.883559	4.78506	1.71e-06	0.00020979
ENST00000301335.10	1216.09	0.838875	0.17532	4.78482	1.71e-06	0.00020987
ENST00000086933.3	2.75296	2.29173	0.478978	4.78462	1.71e-06	0.00020992
ENST00000461823.1	26.3339	-1.83089	0.382727	-4.7838	1.72e-06	0.0002106
ENST00000649721.1	269.038	-2.0721	0.433224	-4.78298	1.73e-06	0.0002113
ENST00000380008.2	6.20735	2.81939	0.589517	4.78254	1.73e-06	0.00021159
ENST00000330943.9	1109.64	1.08919	0.227887	4.77952	1.76e-06	0.00021463
ENST00000621603.1	52.0805	-1.67929	0.351423	-4.77853	1.77e-06	0.00021552
ENST00000652878.1	169.866	-0.989698	0.207121	-4.77836	1.77e-06	0.00021552
ENST00000530013.5	67.6289	-1.78872	0.374457	-4.77683	1.78e-06	0.00021651
ENST00000542074.1	353.007	0.940918	0.196977	4.7768	1.78e-06	0.00021651
ENST00000550846.5	29.5445	1.28247	0.268462	4.77708	1.78e-06	0.00021651
ENST00000432230.6	301.952	-0.80137	0.167755	-4.77703	1.78e-06	0.00021651
ENST00000416454.5	24.145	1.32386	0.277256	4.77488	1.8e-06	0.00021842
ENST00000330553.6	54.4994	3.06669	0.642432	4.77356	1.81e-06	0.00021968
ENST00000624520.1	143.036	-2.59767	0.544263	-4.77282	1.82e-06	0.00022032
ENST00000590690.1	17.3993	-1.53749	0.322326	-4.76999	1.84e-06	0.00022326
ENST00000536531.5	79.4912	1.75328	0.367599	4.76953	1.85e-06	0.00022359
ENST00000371174.5	2.33584	2.21743	0.465037	4.7683	1.86e-06	0.00022479
ENST00000558784.5	2130.06	1.13358	0.237757	4.76783	1.86e-06	0.00022512
ENST00000520141.5	35.4402	1.75838	0.368813	4.76769	1.86e-06	0.00022512
ENST00000673867.1	134.063	-1.40414	0.294647	-4.76551	1.88e-06	0.00022739
ENST00000295211.5	79.6656	1.20608	0.253156	4.7642	1.9e-06	0.00022869
ENST00000447767.1	113.754	2.0544	0.431279	4.7635	1.9e-06	0.0002293
ENST00000422695.5	19.1778	-2.27914	0.478483	-4.76326	1.9e-06	0.00022939
ENST00000398556.7	379.493	-1.42504	0.299206	-4.76272	1.91e-06	0.00022983
ENST00000461684.5	19.5236	-1.90977	0.40105	-4.76192	1.92e-06	0.00023056
ENST00000267205.7	789.106	1.02172	0.214575	4.76161	1.92e-06	0.00023056
ENST00000360321.7	422.6	-0.702253	0.147478	-4.76174	1.92e-06	0.00023056
ENST00000469573.1	4.81089	-2.74073	0.575703	-4.76067	1.93e-06	0.00023145
ENST00000614574.4	194.257	0.738933	0.155258	4.75939	1.94e-06	0.00023274
ENST00000374213.3	2122.56	1.25802	0.264388	4.75822	1.95e-06	0.0002339
ENST00000605744.1	90.2969	1.75226	0.368295	4.75775	1.96e-06	0.00023427
ENST00000602942.5	210.936	1.13943	0.23952	4.75713	1.96e-06	0.00023481
ENST00000520931.5	2162.68	0.912262	0.191789	4.75659	1.97e-06	0.00023514
ENST00000376096.5	110.112	1.01322	0.213023	4.75638	1.97e-06	0.00023514
ENST00000229270.8	67.5459	-3.8791	0.815558	-4.75637	1.97e-06	0.00023514
ENST00000327042.5	221.026	1.17035	0.246109	4.7554	1.98e-06	0.0002361
ENST00000620350.5	360.374	-1.07624	0.226363	-4.75449	1.99e-06	0.00023698
ENST00000475369.3	116.949	0.889301	0.187057	4.75417	1.99e-06	0.00023716
ENST00000311604.8	6927.82	0.904231	0.190217	4.75368	2e-06	0.00023756
ENST00000368405.7	288.813	1.47452	0.310237	4.75287	2.01e-06	0.00023834
ENST00000366510.4	4799.77	-1.07495	0.226276	-4.75062	2.03e-06	0.00024081
ENST00000470980.1	4.99767	-2.39727	0.504722	-4.74968	2.04e-06	0.00024171
ENST00000243563.8	3951.67	0.909045	0.191396	4.74956	2.04e-06	0.00024171
ENST00000366795.4	47.1748	1.6986	0.357646	4.74939	2.04e-06	0.00024172
ENST00000390312.2	3627.32	2.02692	0.42686	4.74843	2.05e-06	0.00024268
ENST00000533504.3	13.0305	1.37546	0.289681	4.7482	2.05e-06	0.00024277
ENST00000599952.1	120.273	-0.770891	0.162365	-4.74788	2.06e-06	0.00024278
ENST00000395590.5	254.527	-0.620418	0.130671	-4.74794	2.05e-06	0.00024278
ENST00000428956.7	18661.8	-1.40985	0.296971	-4.74744	2.06e-06	0.00024313
ENST00000262676.9	210.212	-1.06335	0.224017	-4.74673	2.07e-06	0.0002436
ENST00000376049.4	159.201	1.12225	0.23642	4.74684	2.07e-06	0.0002436
ENST00000658646.1	62.7464	-2.73432	0.576169	-4.74569	2.08e-06	0.00024448
ENST00000477529.1	131.648	1.83434	0.386515	4.74584	2.08e-06	0.00024448
ENST00000586207.5	11.3776	-2.30575	0.485918	-4.74515	2.08e-06	0.00024495
ENST00000692464.1	13.65	-1.12742	0.237613	-4.74477	2.09e-06	0.00024522
ENST00000236067.8	452.715	1.11753	0.235541	4.74453	2.09e-06	0.00024533
ENST00000534488.5	1250.51	0.873921	0.184221	4.74386	2.1e-06	0.0002458
ENST00000560403.5	140.194	1.1665	0.245898	4.74383	2.1e-06	0.0002458
ENST00000458314.1	13.024	1.16097	0.24475	4.74349	2.1e-06	0.00024603
ENST00000460180.1	17.2256	1.33737	0.282047	4.74166	2.12e-06	0.00024807
ENST00000592242.1	15.227	1.69257	0.357008	4.74097	2.13e-06	0.00024872
ENST00000687869.2	6.20303	1.40349	0.296073	4.74035	2.13e-06	0.00024911
ENST00000530016.5	27.7053	-1.72704	0.364323	-4.74042	2.13e-06	0.00024911
ENST00000369893.10	601.057	-0.714411	0.150736	-4.7395	2.14e-06	0.00024997
ENST00000493730.1	10.8534	1.23706	0.261041	4.73894	2.15e-06	0.00025047
ENST00000369126.5	198.541	1.20848	0.255036	4.73848	2.15e-06	0.00025065
ENST00000381565.2	82.5836	0.961801	0.202974	4.73854	2.15e-06	0.00025065
ENST00000486716.5	44.6319	0.898506	0.189643	4.73788	2.16e-06	0.00025108
ENST00000703634.1	231.749	1.64412	0.347019	4.73783	2.16e-06	0.00025108
ENST00000349241.6	872.039	1.48211	0.312908	4.73656	2.17e-06	0.00025247
ENST00000238994.6	1030.56	-1.29678	0.273894	-4.73459	2.19e-06	0.00025474
ENST00000439028.3	167.974	1.54392	0.326177	4.73339	2.21e-06	0.00025606
ENST00000417088.2	10898.9	1.3069	0.276163	4.73237	2.22e-06	0.00025715
ENST00000624543.1	98.0717	-1.36907	0.289315	-4.73211	2.22e-06	0.00025729
ENST00000474738.1	416.175	1.28393	0.271389	4.73098	2.23e-06	0.00025854
ENST00000510898.7	1047.84	0.766412	0.162061	4.72915	2.25e-06	0.00026068
ENST00000437645.5	10.4071	-1.71094	0.361801	-4.72895	2.26e-06	0.00026074
ENST00000424969.2	1118.97	2.2975	0.485876	4.72857	2.26e-06	0.00026089
ENST00000696226.1	24.3361	1.51036	0.319415	4.72852	2.26e-06	0.00026089
ENST00000621827.1	12.3556	-2.01876	0.42698	-4.72799	2.27e-06	0.00026139
ENST00000644250.2	60.8508	2.69071	0.569167	4.72746	2.27e-06	0.00026188
ENST00000505435.4	509.702	-0.976865	0.206668	-4.72674	2.28e-06	0.0002626
ENST00000374467.4	2180.92	0.587262	0.12425	4.72647	2.28e-06	0.00026276
ENST00000417495.7	163.323	1.78266	0.377243	4.72551	2.3e-06	0.00026381
ENST00000370388.4	5.80764	2.07651	0.439474	4.72499	2.3e-06	0.00026428
ENST00000567815.5	38988.3	0.924334	0.195658	4.72423	2.31e-06	0.00026507
ENST00000485088.5	652.096	-0.805993	0.17067	-4.72252	2.33e-06	0.00026711
ENST00000590828.5	237.304	0.878655	0.186081	4.72191	2.34e-06	0.00026772
ENST00000308595.10	9258.78	0.605527	0.128259	4.72112	2.35e-06	0.00026836
ENST00000675519.1	81.3378	-2.38376	0.504901	-4.72124	2.34e-06	0.00026836
ENST00000375215.3	149.681	1.56991	0.33257	4.72055	2.35e-06	0.00026892
ENST00000695740.1	332.981	2.75773	0.584414	4.7188	2.37e-06	0.00027071
ENST00000482526.1	8.11061	1.18242	0.250575	4.71882	2.37e-06	0.00027071
ENST00000674216.1	5.66309	1.80554	0.382644	4.71859	2.37e-06	0.00027071
ENST00000574810.5	112.729	0.949198	0.201159	4.71866	2.37e-06	0.00027071
ENST00000482990.1	9.46127	1.93348	0.409788	4.71825	2.38e-06	0.00027096
ENST00000643692.1	39.4318	0.977554	0.207195	4.71803	2.38e-06	0.00027105
ENST00000597780.1	235.138	-0.929063	0.196987	-4.71636	2.4e-06	0.00027308
ENST00000687499.2	69.0508	0.767075	0.162663	4.71574	2.41e-06	0.00027372
ENST00000627148.3	42.7438	-3.48954	0.740071	-4.71514	2.42e-06	0.00027428
ENST00000301490.8	81.9931	1.46317	0.310322	4.71502	2.42e-06	0.00027428
ENST00000483168.5	10.8535	-8.11422	1.72167	-4.71298	2.44e-06	0.00027683
ENST00000375865.6	34.5375	2.9521	0.626408	4.71274	2.44e-06	0.00027695
ENST00000272602.7	15.6121	-2.16068	0.458659	-4.71087	2.47e-06	0.0002793
ENST00000527620.5	602	-1.24948	0.265277	-4.71011	2.48e-06	0.00028014
ENST00000543435.1	20.6257	2.38654	0.506892	4.70819	2.5e-06	0.00028258
ENST00000395826.7	76.4018	1.33989	0.284604	4.7079	2.5e-06	0.00028278
ENST00000375040.8	1667.3	0.998606	0.21212	4.70773	2.5e-06	0.00028281
ENST00000467741.2	8.13408	1.63826	0.348018	4.70741	2.51e-06	0.00028298
ENST00000284274.5	1900.76	0.540546	0.114831	4.7073	2.51e-06	0.00028298
ENST00000591901.5	70.6565	1.45987	0.310142	4.7071	2.51e-06	0.00028306
ENST00000637539.2	1839.41	1.90876	0.405615	4.70583	2.53e-06	0.00028462
ENST00000517431.1	8.48483	-1.57002	0.333694	-4.70497	2.54e-06	0.00028562
ENST00000525556.1	22.7775	1.00305	0.213204	4.70466	2.54e-06	0.00028583
ENST00000593572.5	21.2538	3.56632	0.75812	4.70416	2.55e-06	0.00028633
ENST00000296658.4	2014.75	-1.16401	0.247544	-4.70224	2.57e-06	0.00028882
ENST00000602349.2	24.3404	-5.05301	1.07475	-4.70156	2.58e-06	0.00028958
ENST00000662580.1	91.0702	-0.667192	0.141942	-4.70045	2.6e-06	0.00029094
ENST00000611368.1	19.6055	-1.50545	0.32031	-4.69998	2.6e-06	0.0002914
ENST00000510138.2	138.006	-0.974462	0.207354	-4.6995	2.61e-06	0.00029186
ENST00000361936.9	844.209	-0.85735	0.182476	-4.69843	2.62e-06	0.00029319
ENST00000532536.5	149.428	1.24656	0.265352	4.69776	2.63e-06	0.00029394
ENST00000373693.4	584.85	1.31835	0.28068	4.697	2.64e-06	0.00029483
ENST00000375954.1	318.367	1.02401	0.218066	4.69585	2.65e-06	0.00029585
ENST00000507680.6	108.713	0.989277	0.210671	4.69584	2.66e-06	0.00029585
ENST00000688034.1	3.30849	-2.20429	0.469408	-4.6959	2.65e-06	0.00029585
ENST00000515663.5	16.7077	-7.10587	1.51332	-4.69555	2.66e-06	0.00029606
ENST00000257897.7	550.966	0.95636	0.203681	4.69537	2.66e-06	0.0002961
ENST00000295958.10	7743.49	-0.834549	0.177794	-4.6939	2.68e-06	0.00029775
ENST00000560585.5	17.4969	3.01578	0.642486	4.69392	2.68e-06	0.00029775
ENST00000291439.8	171.473	1.07405	0.228824	4.6938	2.68e-06	0.00029775
ENST00000411892.5	58.2669	-2.43061	0.517927	-4.69296	2.69e-06	0.00029875
ENST00000396192.7	412.159	2.26192	0.482014	4.69263	2.7e-06	0.00029901
ENST00000497991.1	10.1649	-2.1991	0.468737	-4.69154	2.71e-06	0.0003004
ENST00000528651.1	98.8998	-2.12873	0.453794	-4.69095	2.72e-06	0.00030105
ENST00000359957.8	3221.84	0.916266	0.195337	4.69068	2.72e-06	0.00030123
ENST00000542064.2	447.727	-3.04225	0.648625	-4.69031	2.73e-06	0.00030157
ENST00000624687.1	2695.23	2.64113	0.563166	4.68979	2.73e-06	0.00030191
ENST00000699163.1	12.6494	-0.827644	0.176478	-4.68977	2.74e-06	0.00030191
ENST00000639422.1	90.4772	-0.590475	0.125918	-4.68938	2.74e-06	0.00030197
ENST00000380332.5	13334.7	2.31083	0.492788	4.6893	2.74e-06	0.00030197
ENST00000220003.14	2406.37	0.688655	0.146849	4.68954	2.74e-06	0.00030197
ENST00000441250.6	120.302	1.03755	0.221305	4.68831	2.75e-06	0.00030321
ENST00000563536.1	51.7633	1.24547	0.265669	4.68804	2.76e-06	0.00030339
ENST00000302035.11	466.123	1.26592	0.270113	4.68662	2.78e-06	0.00030529
ENST00000410061.4	143.199	-1.67874	0.358368	-4.6844	2.81e-06	0.0003084
ENST00000578865.5	697.319	1.17567	0.251001	4.68393	2.81e-06	0.00030889
ENST00000443980.6	298.157	1.15793	0.247294	4.68239	2.84e-06	0.00031057
ENST00000684477.1	48.557	-2.0915	0.446686	-4.68227	2.84e-06	0.00031057
ENST00000310054.9	303.001	0.959579	0.204941	4.68223	2.84e-06	0.00031057
ENST00000425542.5	71.5339	0.964416	0.205962	4.6825	2.83e-06	0.00031057
ENST00000689953.1	46.5495	1.77129	0.378328	4.68189	2.84e-06	0.00031086
ENST00000655054.1	20.205	1.04053	0.222342	4.67988	2.87e-06	0.0003137
ENST00000502687.1	11.4222	-1.1513	0.246036	-4.6794	2.88e-06	0.00031399
ENST00000445498.5	92.4484	1.56655	0.334774	4.67942	2.88e-06	0.00031399
ENST00000473728.1	39.5667	3.01058	0.643498	4.67846	2.89e-06	0.00031499
ENST00000618669.3	16.7025	1.93614	0.413833	4.67856	2.89e-06	0.00031499
ENST00000256261.9	17.5287	1.57272	0.336251	4.67723	2.91e-06	0.00031665
ENST00000474820.5	2612.55	0.487311	0.104192	4.67706	2.91e-06	0.00031669
ENST00000222543.11	525.565	-1.73606	0.371227	-4.67655	2.92e-06	0.00031724
ENST00000650688.1	128.892	-1.72209	0.36825	-4.67642	2.92e-06	0.00031724
ENST00000274306.7	626.441	1.18056	0.252479	4.67588	2.93e-06	0.00031785
ENST00000272317.11	43855.8	0.658399	0.140829	4.67516	2.94e-06	0.00031851
ENST00000294168.8	1017.73	0.766839	0.164022	4.67522	2.94e-06	0.00031851
ENST00000487482.5	53.6808	-1.48373	0.31742	-4.67434	2.95e-06	0.00031957
ENST00000570298.5	250.852	-1.53049	0.327436	-4.67415	2.95e-06	0.00031963
ENST00000421530.1	4.07053	-1.67988	0.359442	-4.67358	2.96e-06	0.00032024
ENST00000460650.5	9.0005	1.74889	0.374217	4.67347	2.96e-06	0.00032024
ENST00000587386.1	53.9215	-0.805199	0.17231	-4.67296	2.97e-06	0.00032081
ENST00000503404.5	20.0224	-1.18839	0.254337	-4.67251	2.98e-06	0.00032107
ENST00000262643.8	272.24	1.33577	0.285872	4.67261	2.97e-06	0.00032107
ENST00000314787.8	319.011	0.691447	0.148009	4.67165	2.99e-06	0.00032218
ENST00000274000.10	826.188	-0.480409	0.10287	-4.67008	3.01e-06	0.00032443
ENST00000272367.7	220.167	1.62781	0.348596	4.66961	3.02e-06	0.00032495
ENST00000651999.1	20.9948	1.39758	0.29931	4.66932	3.02e-06	0.00032518
ENST00000571456.2	13.4139	0.865216	0.185312	4.66898	3.03e-06	0.00032548
ENST00000540455.1	1.61483	-2.56726	0.549876	-4.66879	3.03e-06	0.00032556
ENST00000530220.1	192.391	1.0968	0.234967	4.66791	3.04e-06	0.00032673
ENST00000262193.7	7713.51	0.667379	0.142998	4.66704	3.06e-06	0.00032786
ENST00000526004.1	6.49746	1.71942	0.368428	4.66691	3.06e-06	0.00032786
ENST00000382247.6	2985.82	-0.41507	0.0889525	-4.6662	3.07e-06	0.00032878
ENST00000696968.1	524.635	1.23061	0.263769	4.66548	3.08e-06	0.0003297
ENST00000309950.8	65.0161	2.29804	0.492739	4.6638	3.1e-06	0.00033193
ENST00000618265.5	212.985	-2.25615	0.483752	-4.66385	3.1e-06	0.00033193
ENST00000620103.4	10257.8	-1.47559	0.316438	-4.66313	3.11e-06	0.00033278
ENST00000611673.4	149.772	1.37446	0.294796	4.66241	3.13e-06	0.00033373
ENST00000555562.1	113.909	0.706097	0.151456	4.66206	3.13e-06	0.0003339
ENST00000526893.6	5505.94	1.68818	0.362113	4.66201	3.13e-06	0.0003339
ENST00000422760.1	1081.55	0.54841	0.117662	4.66089	3.15e-06	0.0003355
ENST00000505852.1	89.2282	0.96783	0.207686	4.66007	3.16e-06	0.0003366
ENST00000256649.9	936.767	-0.709758	0.152313	-4.65986	3.16e-06	0.00033663
ENST00000572250.1	64.4481	-0.913493	0.196038	-4.65976	3.17e-06	0.00033663
ENST00000314583.8	4374.2	0.864713	0.185643	4.65794	3.19e-06	0.00033876
ENST00000463516.5	269.165	1.11796	0.240002	4.6581	3.19e-06	0.00033876
ENST00000553521.5	102.446	0.94394	0.202639	4.65824	3.19e-06	0.00033876
ENST00000509637.6	4.80752	-1.43763	0.308644	-4.6579	3.19e-06	0.00033876
ENST00000418386.3	145.619	2.14553	0.460671	4.6574	3.2e-06	0.00033936
ENST00000309295.9	6680.46	0.511885	0.109928	4.65654	3.22e-06	0.00034053
ENST00000366215.2	58.6566	-2.08853	0.448598	-4.65568	3.23e-06	0.00034162
ENST00000477706.1	31.2886	1.52366	0.327276	4.6556	3.23e-06	0.00034162
ENST00000607158.5	13.6689	-1.54384	0.331705	-4.65425	3.25e-06	0.00034339
ENST00000371383.7	845.506	-1.2451	0.267513	-4.65436	3.25e-06	0.00034339
ENST00000525208.1	170.788	1.51306	0.325151	4.6534	3.27e-06	0.00034458
ENST00000512562.1	5.62698	-1.57099	0.337649	-4.65273	3.28e-06	0.00034538
ENST00000358647.5	1700.15	0.947833	0.203719	4.65264	3.28e-06	0.00034538
ENST00000542590.2	717.193	1.22819	0.263999	4.65225	3.28e-06	0.0003458
ENST00000564869.1	6.66182	-1.13826	0.244699	-4.65166	3.29e-06	0.00034654
ENST00000593993.7	270.173	1.12415	0.24168	4.65139	3.3e-06	0.00034676
ENST00000617374.2	387.092	2.27437	0.48905	4.65058	3.31e-06	0.00034789
ENST00000390325.2	45456.5	2.1038	0.452433	4.64997	3.32e-06	0.00034869
ENST00000438382.2	585.182	1.17203	0.252062	4.64976	3.32e-06	0.0003488
ENST00000227155.9	4768.21	0.854638	0.183818	4.64936	3.33e-06	0.00034923
ENST00000309007.9	6448.82	0.653342	0.140531	4.6491	3.33e-06	0.00034944
ENST00000419978.1	5.64495	-2.20511	0.474383	-4.64837	3.35e-06	0.00035043
ENST00000307149.10	1563.74	-0.447713	0.0963462	-4.64692	3.37e-06	0.00035266
ENST00000367324.8	3054.63	1.72514	0.371261	4.64671	3.37e-06	0.00035278
ENST00000515732.1	7.07721	-2.39606	0.515692	-4.64631	3.38e-06	0.00035324
ENST00000660207.1	259.717	-1.3299	0.286245	-4.64602	3.38e-06	0.00035328
ENST00000703977.1	63.9461	-2.26037	0.48652	-4.646	3.38e-06	0.00035328
ENST00000444740.2	92.4213	1.9229	0.413908	4.64572	3.39e-06	0.00035352
ENST00000503185.5	89.0505	-1.0061	0.216591	-4.64518	3.4e-06	0.0003542
ENST00000603660.1	5351.46	2.41956	0.520944	4.64456	3.41e-06	0.00035503
ENST00000590211.5	49.634	4.23847	0.912626	4.64426	3.41e-06	0.00035531
ENST00000696906.1	59.3065	2.21913	0.477907	4.64343	3.43e-06	0.00035649
ENST00000372624.3	901.138	-0.724458	0.156032	-4.64302	3.43e-06	0.00035696
ENST00000526450.1	35.6715	0.767022	0.165219	4.64245	3.44e-06	0.0003577
ENST00000652012.1	549.933	-2.64969	0.570796	-4.6421	3.45e-06	0.00035794
ENST00000471448.2	61.5677	1.43897	0.309988	4.64204	3.45e-06	0.00035794
ENST00000330651.11	1456.51	0.848918	0.18289	4.64168	3.46e-06	0.00035831
ENST00000373501.6	152.794	0.953767	0.205534	4.64043	3.48e-06	0.00036024
ENST00000263045.9	722.579	-2.70062	0.582042	-4.63991	3.49e-06	0.00036091
ENST00000368465.5	2056.5	1.54564	0.3332	4.63877	3.5e-06	0.00036266
ENST00000503680.1	14.8128	1.55347	0.334966	4.6377	3.52e-06	0.00036431
ENST00000485356.1	13.2899	0.982384	0.211835	4.63751	3.53e-06	0.00036439
ENST00000432874.7	13.3755	-1.65186	0.356323	-4.63585	3.55e-06	0.00036688
ENST00000293443.12	336.307	1.05891	0.22842	4.63582	3.56e-06	0.00036688
ENST00000367360.7	16.6776	1.39027	0.29995	4.63499	3.57e-06	0.00036811
ENST00000424215.1	20.8707	0.969851	0.209272	4.63441	3.58e-06	0.00036866
ENST00000465202.1	27.5953	2.24577	0.484597	4.6343	3.58e-06	0.00036866
ENST00000429677.8	13.9749	2.56935	0.554466	4.63391	3.59e-06	0.00036866
ENST00000532004.5	20.6049	1.60244	0.345831	4.63358	3.59e-06	0.00036866
ENST00000588672.1	22.1931	-1.32462	0.285861	-4.6338	3.59e-06	0.00036866
ENST00000624506.1	17.3278	-1.59077	0.343311	-4.6336	3.59e-06	0.00036866
ENST00000623962.1	17.3278	-1.59077	0.343311	-4.6336	3.59e-06	0.00036866
ENST00000624806.1	17.3278	-1.59077	0.343311	-4.6336	3.59e-06	0.00036866
ENST00000473726.1	3387.01	2.18923	0.472514	4.63317	3.6e-06	0.00036914
ENST00000489919.1	106.207	2.04371	0.441134	4.63286	3.61e-06	0.0003692
ENST00000567500.1	42.8122	2.13126	0.460027	4.6329	3.61e-06	0.0003692
ENST00000295095.11	691.323	0.835415	0.180341	4.63243	3.61e-06	0.00036972
ENST00000548580.5	364.881	1.13469	0.244983	4.63169	3.63e-06	0.00037079
ENST00000366903.8	514.874	0.655249	0.141486	4.63119	3.64e-06	0.00037145
ENST00000643976.1	38.1308	-5.40826	1.16805	-4.63015	3.65e-06	0.00037308
ENST00000570241.3	47.7284	1.09484	0.236482	4.62969	3.66e-06	0.00037364
ENST00000443003.2	720.34	2.58375	0.558113	4.62944	3.67e-06	0.0003737
ENST00000400169.1	78.705	1.44301	0.311707	4.62939	3.67e-06	0.0003737
ENST00000459255.1	12.7609	1.53007	0.330581	4.62842	3.68e-06	0.00037495
ENST00000564661.1	84.7101	-1.03734	0.224124	-4.62843	3.68e-06	0.00037495
ENST00000461241.1	132.125	-1.40073	0.302677	-4.6278	3.7e-06	0.00037583
ENST00000647336.1	2.19153	2.87144	0.620631	4.62665	3.72e-06	0.00037767
ENST00000505058.5	15.99	1.39171	0.3009	4.62517	3.74e-06	0.00038012
ENST00000528089.1	62.381	-0.820757	0.177474	-4.62465	3.75e-06	0.00038057
ENST00000558083.2	23.4511	-0.896655	0.193883	-4.62472	3.75e-06	0.00038057
ENST00000686004.1	8.65245	2.69084	0.581931	4.62399	3.76e-06	0.00038155
ENST00000448149.1	9.34763	-2.04912	0.443217	-4.62329	3.78e-06	0.00038258
ENST00000342879.7	208.116	1.49026	0.322355	4.62304	3.78e-06	0.00038278
ENST00000496764.6	13.0009	1.42811	0.30895	4.62245	3.79e-06	0.00038363
ENST00000477084.1	89.2359	0.997206	0.215781	4.62138	3.81e-06	0.00038536
ENST00000259750.9	61.7645	1.47674	0.319634	4.6201	3.84e-06	0.00038724
ENST00000171757.3	614.206	1.35525	0.293333	4.62019	3.83e-06	0.00038724
ENST00000508945.5	5.4123	-3.81755	0.826358	-4.61973	3.84e-06	0.00038766
ENST00000321367.8	818.234	1.83388	0.397007	4.61926	3.85e-06	0.00038829
ENST00000522615.1	57.6154	-1.65441	0.358177	-4.61897	3.86e-06	0.00038852
ENST00000552893.1	1383.3	1.60938	0.348435	4.61887	3.86e-06	0.00038852
ENST00000517712.5	459.334	-1.06624	0.230892	-4.61793	3.88e-06	0.00039003
ENST00000433193.2	28.2369	2.44565	0.529674	4.61727	3.89e-06	0.00039075
ENST00000623352.1	18.198	-1.19613	0.259053	-4.61733	3.89e-06	0.00039075
ENST00000701813.1	20.6303	1.85442	0.401739	4.61597	3.91e-06	0.00039295
ENST00000396138.9	7.20919	-2.72437	0.590262	-4.61553	3.92e-06	0.00039353
ENST00000597260.1	8.93152	-3.47328	0.752657	-4.61469	3.94e-06	0.00039486
ENST00000357450.9	91.248	1.51632	0.328596	4.61455	3.94e-06	0.00039486
ENST00000475124.1	472.593	-1.1558	0.250499	-4.614	3.95e-06	0.00039567
ENST00000227507.3	23986.1	-1.18928	0.257786	-4.61342	3.96e-06	0.0003965
ENST00000337917.11	587.582	0.966877	0.209628	4.61234	3.98e-06	0.00039806
ENST00000428830.6	194.04	1.11573	0.241894	4.61245	3.98e-06	0.00039806
ENST00000528296.5	525.55	1.04315	0.226174	4.61218	3.98e-06	0.0003981
ENST00000442188.1	3.50409	-2.89407	0.627636	-4.61107	4.01e-06	0.0003998
ENST00000583260.1	2.12207	2.02891	0.440012	4.61102	4.01e-06	0.0003998
ENST00000591292.5	712.146	-0.85709	0.185896	-4.61058	4.02e-06	0.0004004
ENST00000301200.3	596.909	1.00725	0.218499	4.60986	4.03e-06	0.00040152
ENST00000595203.1	66.2846	-1.00399	0.217802	-4.60964	4.03e-06	0.00040169
ENST00000479055.5	49.7432	-0.859877	0.186576	-4.60872	4.05e-06	0.00040295
ENST00000439055.6	32.0666	1.44177	0.312828	4.60883	4.05e-06	0.00040295
ENST00000441735.2	99.9459	1.23246	0.267454	4.60813	4.06e-06	0.00040383
ENST00000651483.1	63.1172	-2.05569	0.446142	-4.6077	4.07e-06	0.00040437
ENST00000304710.5	17.3352	-3.43077	0.744592	-4.60758	4.07e-06	0.00040437
ENST00000498435.1	865.361	2.21718	0.481225	4.60737	4.08e-06	0.00040453
ENST00000489196.1	332.721	-1.08122	0.2347	-4.60683	4.09e-06	0.00040491
ENST00000550765.6	961.973	0.946125	0.205377	4.60677	4.09e-06	0.00040491
ENST00000412293.5	29.5147	-0.846417	0.18373	-4.60686	4.09e-06	0.00040491
ENST00000437877.1	72.1646	1.15533	0.250822	4.60617	4.1e-06	0.00040582
ENST00000589905.2	78.6381	0.778969	0.169139	4.6055	4.11e-06	0.00040687
ENST00000474997.1	4.67462	-2.5176	0.546678	-4.60528	4.12e-06	0.0004069
ENST00000594637.1	14.4758	-3.25502	0.706833	-4.60508	4.12e-06	0.0004069
ENST00000468169.6_PAR_Y	45.1913	1.13306	0.24604	4.60518	4.12e-06	0.0004069
ENST00000498497.2	92.7444	-1.022	0.221957	-4.60451	4.13e-06	0.00040775
ENST00000396496.7	1535.28	-0.772681	0.167836	-4.60379	4.15e-06	0.00040891
ENST00000326639.11	459.482	-0.593473	0.128931	-4.60305	4.16e-06	0.0004101
ENST00000615744.4	300.73	-0.915259	0.198866	-4.60238	4.18e-06	0.00041115
ENST00000399066.7	120.278	-1.45191	0.315582	-4.60073	4.21e-06	0.00041417
ENST00000469673.1	486.719	1.3716	0.298183	4.59984	4.23e-06	0.00041566
ENST00000441255.7	70.2707	1.30426	0.283663	4.59791	4.27e-06	0.00041927
ENST00000390284.2	116.086	2.27959	0.495806	4.59774	4.27e-06	0.00041934
ENST00000443607.2	186.502	1.10144	0.239594	4.5971	4.28e-06	0.00042036
ENST00000683327.1	494.752	-1.4751	0.320908	-4.59666	4.29e-06	0.00042072
ENST00000248901.11	2301.35	0.867029	0.188619	4.59673	4.29e-06	0.00042072
ENST00000403888.8	67.8751	1.28892	0.280416	4.59644	4.3e-06	0.00042089
ENST00000552038.6	208.712	-0.775345	0.168701	-4.59597	4.31e-06	0.00042157
ENST00000623406.1	60.7466	-1.0111	0.220016	-4.59559	4.32e-06	0.00042207
ENST00000491060.1	58.0981	1.35778	0.295467	4.59536	4.32e-06	0.00042227
ENST00000505812.1	33.6665	1.95441	0.425346	4.59487	4.33e-06	0.00042299
ENST00000475350.5	1129.23	0.78629	0.171141	4.59441	4.34e-06	0.0004234
ENST00000552565.5	621.998	1.16964	0.254576	4.59446	4.34e-06	0.0004234
ENST00000527923.1	98.0523	1.13635	0.247367	4.5938	4.35e-06	0.00042435
ENST00000475441.6	112.244	2.47466	0.53888	4.59222	4.39e-06	0.00042704
ENST00000221452.13	1980.49	0.925672	0.201571	4.59229	4.38e-06	0.00042704
ENST00000220478.8	13.9385	1.81495	0.395243	4.59199	4.39e-06	0.00042724
ENST00000490264.1	86.068	-1.44052	0.313749	-4.59132	4.4e-06	0.00042808
ENST00000406855.7	421.971	1.31505	0.286414	4.59145	4.4e-06	0.00042808
ENST00000417346.2	34.6845	0.799402	0.174145	4.59045	4.42e-06	0.0004296
ENST00000356892.4	2462.8	0.977765	0.213027	4.58986	4.44e-06	0.00043054
ENST00000521249.1	133.992	-0.65215	0.142094	-4.58955	4.44e-06	0.0004309
ENST00000504087.6	3872.73	-0.948578	0.2067	-4.58916	4.45e-06	0.00043144
ENST00000592913.5	116.647	0.891657	0.194302	4.58901	4.45e-06	0.00043147
ENST00000312637.5	839.671	-0.699327	0.152405	-4.58862	4.46e-06	0.00043201
ENST00000484218.6	8.51444	2.91534	0.635387	4.58829	4.47e-06	0.00043241
ENST00000483767.5	439.801	1.28801	0.280768	4.58745	4.49e-06	0.00043362
ENST00000382874.6	258.629	-1.12009	0.244161	-4.58751	4.49e-06	0.00043362
ENST00000556479.6	3.77413	2.10326	0.458519	4.58708	4.49e-06	0.00043384
ENST00000652751.1	41.7545	-1.53223	0.334025	-4.58716	4.49e-06	0.00043384
ENST00000635823.2	523.609	-1.11479	0.243065	-4.58639	4.51e-06	0.000435
ENST00000610813.1	184.145	-0.469872	0.102465	-4.58567	4.53e-06	0.00043623
ENST00000529580.1	398.91	1.57309	0.343182	4.58384	4.57e-06	0.00043964
ENST00000401419.7	459.632	0.905907	0.197633	4.58378	4.57e-06	0.00043964
ENST00000395822.7	340.401	1.44846	0.316065	4.5828	4.59e-06	0.00044143
ENST00000376925.8	17963.7	0.884633	0.193053	4.58234	4.6e-06	0.00044214
ENST00000419548.4	1534.29	1.26964	0.277081	4.58219	4.6e-06	0.00044218
ENST00000649111.1	10.1963	-2.42058	0.528344	-4.58144	4.62e-06	0.0004432
ENST00000467719.5	180.646	-0.947712	0.206859	-4.58144	4.62e-06	0.0004432
ENST00000601684.1	147.151	2.3833	0.52029	4.58071	4.63e-06	0.00044448
ENST00000472512.2	22.7575	-1.12283	0.245185	-4.57952	4.66e-06	0.00044673
ENST00000606343.1	173.566	-1.92315	0.420051	-4.57838	4.69e-06	0.0004489
ENST00000367819.3	55.4154	1.25679	0.274556	4.57754	4.7e-06	0.00045006
ENST00000634473.1	137.421	1.36668	0.298551	4.5777	4.7e-06	0.00045006
ENST00000258711.7	1693.91	0.581219	0.126975	4.57745	4.71e-06	0.00045006
ENST00000482248.7	272.851	1.20491	0.263266	4.57677	4.72e-06	0.00045119
ENST00000564485.1	4.57106	1.18454	0.258823	4.57666	4.72e-06	0.00045119
ENST00000595984.5	20.0683	1.20952	0.264298	4.57636	4.73e-06	0.00045157
ENST00000393414.6	50.2321	2.09263	0.457314	4.57593	4.74e-06	0.00045221
ENST00000259154.9	6559.41	-0.913911	0.199768	-4.57486	4.77e-06	0.00045424
ENST00000461612.1	50.9174	1.41257	0.308813	4.57419	4.78e-06	0.00045541
ENST00000371149.8	476.182	1.60794	0.351573	4.57356	4.79e-06	0.0004565
ENST00000600626.1	88.4092	-1.9615	0.428916	-4.57315	4.8e-06	0.00045712
ENST00000525451.6	590.156	1.41708	0.309894	4.57278	4.81e-06	0.00045735
ENST00000453914.3	17.8193	0.933207	0.204076	4.57284	4.81e-06	0.00045735
ENST00000445755.7	3705	0.94748	0.207215	4.57246	4.82e-06	0.00045779
ENST00000474485.1	685.964	0.687727	0.150484	4.5701	4.88e-06	0.00046268
ENST00000413140.5	167.508	1.59672	0.349445	4.56931	4.89e-06	0.00046371
ENST00000611116.2	2722.1	1.13914	0.249306	4.56924	4.89e-06	0.00046371
ENST00000418374.6	13.5253	-4.08679	0.894377	-4.56943	4.89e-06	0.00046371
ENST00000536551.6	207.969	-1.94293	0.425311	-4.56825	4.92e-06	0.00046563
ENST00000553861.1	109.34	2.12424	0.465262	4.56569	4.98e-06	0.00047093
ENST00000528163.6	464.311	1.84144	0.403327	4.56562	4.98e-06	0.00047093
ENST00000607836.2	17.4543	-0.796895	0.17455	-4.56543	4.98e-06	0.00047106
ENST00000466891.5	1.87724	2.16	0.473159	4.56506	4.99e-06	0.00047132
ENST00000660892.2	6.40346	0.910576	0.199465	4.56509	4.99e-06	0.00047132
ENST00000543103.1	711.844	1.24469	0.272687	4.56453	5.01e-06	0.00047221
ENST00000447712.7	163.322	-7.40752	1.62326	-4.56336	5.03e-06	0.00047456
ENST00000317012.5	134.821	1.53335	0.336026	4.56319	5.04e-06	0.00047465
ENST00000662408.1	19.7796	-2.08435	0.456827	-4.56268	5.05e-06	0.00047553
ENST00000622628.1	65.9256	0.566777	0.124228	4.56239	5.06e-06	0.00047588
ENST00000651876.1	6.20913	1.65756	0.363364	4.5617	5.07e-06	0.00047716
ENST00000456944.1	46.9286	1.32769	0.291109	4.56081	5.1e-06	0.00047889
ENST00000609268.2	111.569	1.49346	0.327538	4.55964	5.12e-06	0.00048127
ENST00000064780.7	616.983	0.67706	0.148544	4.55798	5.16e-06	0.00048479
ENST00000469458.5	65.1774	1.38023	0.30289	4.55686	5.19e-06	0.00048708
ENST00000270812.6	25.773	1.14722	0.25177	4.55662	5.2e-06	0.00048735
ENST00000360482.7	23.9111	-1.8316	0.402017	-4.55602	5.21e-06	0.00048845
ENST00000532359.5	2474.37	0.838549	0.184063	4.55578	5.22e-06	0.00048871
ENST00000491847.1	587.654	-0.856753	0.188079	-4.55529	5.23e-06	0.00048955
ENST00000414862.5	259.217	1.11911	0.245693	4.55492	5.24e-06	0.00049011
ENST00000564211.1	107.934	-0.64679	0.142003	-4.55477	5.24e-06	0.00049017
ENST00000697576.1	945.494	-0.782946	0.171911	-4.55437	5.25e-06	0.00049074
ENST00000454712.7	3.57103	-3.08963	0.678404	-4.55427	5.26e-06	0.00049074
ENST00000584610.2	213.624	-1.0643	0.23371	-4.55396	5.26e-06	0.00049116
ENST00000607044.1	11.9376	1.06836	0.23463	4.55338	5.28e-06	0.00049121
ENST00000230792.7	996.455	-0.847773	0.186189	-4.5533	5.28e-06	0.00049121
ENST00000604650.1	12.4701	1.39534	0.306426	4.55361	5.27e-06	0.00049121
ENST00000264025.8	4890.11	0.801333	0.175985	4.55343	5.28e-06	0.00049121
ENST00000568871.1	1016.57	-1.06351	0.233558	-4.55353	5.28e-06	0.00049121
ENST00000654057.3	4.98461	-3.13314	0.688263	-4.55224	5.31e-06	0.00049279
ENST00000696160.1	14.5548	2.25934	0.496303	4.55233	5.31e-06	0.00049279
ENST00000617205.1	30.5948	1.00296	0.220313	4.55246	5.3e-06	0.00049279
ENST00000642087.2	768.571	0.614687	0.135043	4.55178	5.32e-06	0.00049329
ENST00000558501.5	38.2038	-1.00529	0.220854	-4.55185	5.32e-06	0.00049329
ENST00000320256.6	100.432	1.51164	0.332115	4.55154	5.33e-06	0.00049329
ENST00000587619.1	20.5049	1.12053	0.246189	4.55152	5.33e-06	0.00049329
ENST00000339728.6	449.86	0.728817	0.160295	4.54672	5.45e-06	0.00050408
ENST00000567082.1	6.32059	-2.40836	0.529692	-4.54673	5.45e-06	0.00050408
ENST00000343550.9	1478.62	1.00693	0.221494	4.54606	5.47e-06	0.00050534
ENST00000365668.1	8.10425	1.6018	0.352379	4.54568	5.48e-06	0.00050597
ENST00000597652.1	97.9463	-0.952739	0.209609	-4.54531	5.49e-06	0.00050654
ENST00000650711.1	121.024	-2.22168	0.488807	-4.5451	5.49e-06	0.00050673
ENST00000367658.3	3795.37	0.456828	0.100519	4.54468	5.5e-06	0.00050745
ENST00000327892.13	55634.5	0.622281	0.136938	4.54425	5.51e-06	0.00050817
ENST00000301073.4	855.14	0.837708	0.184402	4.54283	5.55e-06	0.00051131
ENST00000579681.5	7.2133	-1.28851	0.283653	-4.54255	5.56e-06	0.00051169
ENST00000485956.1	32.0172	-2.25547	0.49661	-4.54174	5.58e-06	0.00051336
ENST00000453876.1	35.467	-1.0915	0.240338	-4.54152	5.58e-06	0.00051346
ENST00000326303.5	347.026	-0.962506	0.211939	-4.54144	5.59e-06	0.00051346
ENST00000525815.6	1114.28	0.619821	0.136502	4.54076	5.61e-06	0.00051481
ENST00000682537.1	1885.76	1.58783	0.349715	4.54034	5.62e-06	0.00051522
ENST00000597451.5	2873.13	1.66646	0.36703	4.54038	5.62e-06	0.00051522
ENST00000355076.6	104.016	-0.999734	0.220207	-4.53998	5.63e-06	0.00051558
ENST00000697622.1	200.435	1.13434	0.249859	4.53994	5.63e-06	0.00051558
ENST00000291232.5	423.125	1.27651	0.281205	4.53942	5.64e-06	0.00051654
ENST00000311106.8	92.9992	1.29847	0.286086	4.53873	5.66e-06	0.00051794
ENST00000495912.5	52.4434	1.53967	0.339268	4.53822	5.67e-06	0.00051857
ENST00000522431.5	24.3042	0.918161	0.202312	4.53833	5.67e-06	0.00051857
ENST00000464198.5	112.17	1.81261	0.399488	4.53734	5.7e-06	0.00052012
ENST00000587837.5	321.827	1.0796	0.237937	4.53734	5.7e-06	0.00052012
ENST00000690040.1	17.8309	1.20496	0.265612	4.53653	5.72e-06	0.00052177
ENST00000593402.6	112.599	-1.70997	0.376942	-4.53642	5.72e-06	0.00052177
ENST00000374550.8	25573.6	0.857304	0.18906	4.53456	5.77e-06	0.00052453
ENST00000646501.1	20.0005	1.25898	0.277639	4.5346	5.77e-06	0.00052453
ENST00000556973.2	15.0468	1.16787	0.257536	4.53479	5.77e-06	0.00052453
ENST00000373184.5	891.661	-2.83382	0.624884	-4.53495	5.76e-06	0.00052453
ENST00000434568.5	503.774	0.753252	0.166094	4.53509	5.76e-06	0.00052453
ENST00000460809.5	752.426	-0.995249	0.219479	-4.53459	5.77e-06	0.00052453
ENST00000531322.1	37.5422	-1.32068	0.291259	-4.53438	5.78e-06	0.00052456
ENST00000370086.8	10380.8	0.831633	0.18341	4.53429	5.78e-06	0.00052456
ENST00000360149.9	4.11564	-3.96328	0.874185	-4.53369	5.8e-06	0.00052576
ENST00000427632.2	103.76	2.03498	0.448882	4.53346	5.8e-06	0.00052603
ENST00000374982.5	2446.91	0.88693	0.19567	4.53278	5.82e-06	0.00052709
ENST00000342503.8	126.695	-3.5559	0.784465	-4.5329	5.82e-06	0.00052709
ENST00000430357.4	173.066	1.27049	0.280329	4.53215	5.84e-06	0.00052837
ENST00000482537.1	125.024	0.936343	0.206614	4.53185	5.85e-06	0.00052879
ENST00000550288.6	12.1364	2.19391	0.484171	4.53128	5.86e-06	0.00052992
ENST00000399916.5	307.022	1.64428	0.362894	4.53102	5.87e-06	0.00053025
ENST00000486448.1	3.18121	-2.60583	0.575238	-4.53	5.9e-06	0.00053251
ENST00000329957.7	1766.3	0.766633	0.169297	4.52834	5.94e-06	0.00053629
ENST00000342147.4	193.857	-0.767461	0.169483	-4.52826	5.95e-06	0.00053629
ENST00000265191.4	151.415	-1.34577	0.297301	-4.52664	5.99e-06	0.00054009
ENST00000691995.1	376.753	-1.53849	0.339947	-4.52569	6.02e-06	0.00054189
ENST00000371899.9	408.909	0.955351	0.211093	4.52573	6.02e-06	0.00054189
ENST00000483765.5	58.86	2.04248	0.451528	4.52348	6.08e-06	0.00054725
ENST00000601736.1	36.7547	1.635	0.361459	4.52333	6.09e-06	0.00054733
ENST00000276282.7	1582.14	0.606349	0.134057	4.52305	6.1e-06	0.00054772
ENST00000462138.6	296.367	1.66905	0.369033	4.52276	6.1e-06	0.00054797
ENST00000586283.6	257.869	1.15751	0.255933	4.52271	6.11e-06	0.00054797
ENST00000690278.2	42.0973	1.05605	0.23352	4.52231	6.12e-06	0.00054868
ENST00000690199.1	14.1787	-2.4974	0.552488	-4.52028	6.18e-06	0.00055339
ENST00000591814.5	123.256	1.131	0.250207	4.52026	6.18e-06	0.00055339
ENST00000534981.5	118.304	0.938958	0.20773	4.52009	6.18e-06	0.00055342
ENST00000683627.1	544.851	0.789686	0.174709	4.52	6.18e-06	0.00055342
ENST00000592991.1	30.8478	-0.944368	0.208953	-4.51951	6.2e-06	0.00055405
ENST00000596248.1	100.535	-1.03256	0.228462	-4.51959	6.2e-06	0.00055405
ENST00000331569.6	7815.85	-1.20898	0.267529	-4.51907	6.21e-06	0.00055488
ENST00000657415.1	175.556	-1.03799	0.229773	-4.51746	6.26e-06	0.0005588
ENST00000295974.12	1161.98	-1.44378	0.319648	-4.51678	6.28e-06	0.00055962
ENST00000539086.5	10.1505	1.97067	0.436283	4.51696	6.27e-06	0.00055962
ENST00000497872.4	375.417	1.88458	0.417234	4.51684	6.28e-06	0.00055962
ENST00000369718.4	980.961	0.875186	0.193775	4.51651	6.29e-06	0.00055995
ENST00000583418.1	705.498	-0.995693	0.220461	-4.51641	6.29e-06	0.00055995
ENST00000437559.1	19.6824	1.58416	0.350844	4.51528	6.32e-06	0.0005626
ENST00000526638.1	341.34	1.27051	0.281408	4.51484	6.34e-06	0.00056345
ENST00000441682.6	14.8325	-3.49513	0.774197	-4.51452	6.35e-06	0.00056399
ENST00000565860.1	166.716	2.17521	0.481952	4.51333	6.38e-06	0.00056682
ENST00000706784.1	86.8059	0.752912	0.16686	4.51224	6.41e-06	0.0005691
ENST00000338380.2	4366.52	1.76926	0.392102	4.51226	6.41e-06	0.0005691
ENST00000273183.8	318.595	1.39892	0.310126	4.51082	6.46e-06	0.00057226
ENST00000624433.1	3.05857	-2.54236	0.563605	-4.5109	6.46e-06	0.00057226
ENST00000404589.8	657.889	-0.799786	0.177316	-4.51051	6.47e-06	0.00057242
ENST00000253047.7	883.316	0.971646	0.215412	4.51063	6.46e-06	0.00057242
ENST00000598441.6	4130.82	1.15229	0.255475	4.51038	6.47e-06	0.00057246
ENST00000296921.6	19.6067	3.47694	0.771115	4.50899	6.51e-06	0.00057529
ENST00000468546.5	188.355	1.1342	0.251542	4.509	6.51e-06	0.00057529
ENST00000550214.1	69.9407	2.17126	0.481544	4.50896	6.51e-06	0.00057529
ENST00000427140.5	15.3746	1.43464	0.318217	4.50836	6.53e-06	0.00057659
ENST00000428634.1	146.985	2.51826	0.558629	4.50794	6.55e-06	0.00057675
ENST00000585471.1	59.4198	1.14374	0.253706	4.50815	6.54e-06	0.00057675
ENST00000373003.2	9.25154	1.6105	0.357255	4.508	6.54e-06	0.00057675
ENST00000468611.5	1195.18	1.36715	0.303338	4.50703	6.57e-06	0.00057889
ENST00000420164.5	39.0426	1.6016	0.355379	4.50675	6.58e-06	0.00057932
ENST00000530265.1	9.33959	-2.29081	0.508373	-4.50617	6.6e-06	0.00058059
ENST00000372720.7	32.8228	-1.19047	0.264221	-4.50556	6.62e-06	0.0005819
ENST00000691837.1	5.29605	-4.13218	0.917265	-4.5049	6.64e-06	0.0005834
ENST00000392320.7	553.804	0.90685	0.201316	4.5046	6.65e-06	0.00058388
ENST00000253754.8	782.885	0.981609	0.217942	4.50399	6.67e-06	0.00058522
ENST00000532567.5	370.758	0.960027	0.213175	4.50346	6.69e-06	0.00058636
ENST00000493921.1	1.55687	2.51213	0.557844	4.50329	6.69e-06	0.0005865
ENST00000617339.4	1917.59	-1.50781	0.334891	-4.5024	6.72e-06	0.00058728
ENST00000532202.1	6.4993	1.91961	0.426322	4.50273	6.71e-06	0.00058728
ENST00000390477.2	239.732	1.22338	0.271715	4.50243	6.72e-06	0.00058728
ENST00000566432.1	205.052	-2.26322	0.502646	-4.50262	6.71e-06	0.00058728
ENST00000381297.10_PAR_Y	474.942	1.05553	0.234436	4.50245	6.72e-06	0.00058728
ENST00000527031.5	441.714	1.32762	0.294899	4.50194	6.73e-06	0.00058822
ENST00000515838.2	57.119	1.57549	0.349981	4.50163	6.74e-06	0.00058874
ENST00000248342.9	8245.64	0.961446	0.213595	4.50126	6.76e-06	0.00058943
ENST00000441402.5	520.022	1.06229	0.236033	4.5006	6.78e-06	0.00059092
ENST00000526116.5	15.8666	1.20158	0.267008	4.50016	6.79e-06	0.0005918
ENST00000471613.1	35.3977	-1.18502	0.26334	-4.49998	6.8e-06	0.00059199
ENST00000429295.1	43.7437	1.08384	0.240875	4.49959	6.81e-06	0.00059275
ENST00000570539.1	1324.92	1.36679	0.30378	4.49929	6.82e-06	0.00059324
ENST00000551302.1	23.4051	-1.26543	0.28129	-4.49866	6.84e-06	0.00059466
ENST00000481287.5	15.3523	1.49916	0.333345	4.49734	6.88e-06	0.00059787
ENST00000693589.2	26.9309	1.03768	0.230742	4.49715	6.89e-06	0.00059787
ENST00000344731.10	7.28124	5.14742	1.14457	4.49727	6.88e-06	0.00059787
ENST00000593972.1	20.723	-1.71579	0.381546	-4.49694	6.89e-06	0.00059813
ENST00000264868.9	2143.26	1.11534	0.248036	4.49668	6.9e-06	0.00059819
ENST00000566140.6	26.0938	3.27843	0.729069	4.49673	6.9e-06	0.00059819
ENST00000589219.1	29.414	-0.576224	0.128148	-4.49656	6.91e-06	0.0005982
ENST00000525760.1	6.04451	-2.86683	0.637645	-4.49596	6.93e-06	0.00059945
ENST00000600067.1	12.7747	1.03117	0.229359	4.49587	6.93e-06	0.00059945
ENST00000264192.8	987.187	1.03446	0.23014	4.49492	6.96e-06	0.00060181
ENST00000480266.5	1625.04	1.77891	0.39584	4.49401	6.99e-06	0.00060405
ENST00000288398.10	48.4835	1.52812	0.340181	4.49209	7.05e-06	0.00060918
ENST00000343505.10	880.874	0.729162	0.162342	4.49152	7.07e-06	0.00061046
ENST00000309263.7	2650.24	-1.90922	0.425127	-4.49094	7.09e-06	0.00061179
ENST00000674003.1	5.82524	5.46218	1.21634	4.49065	7.1e-06	0.00061228
ENST00000652570.1	67.8971	-1.09013	0.242779	-4.4902	7.12e-06	0.00061322
ENST00000398603.6	136.686	1.03588	0.230723	4.48974	7.13e-06	0.00061422
ENST00000416567.1	6.41193	-1.40685	0.313359	-4.48958	7.14e-06	0.00061432
ENST00000695928.2	95.2529	-1.01117	0.22524	-4.4893	7.15e-06	0.00061443
ENST00000269159.8	1420.17	1.07138	0.238648	4.48936	7.14e-06	0.00061443
ENST00000665531.1	26.9029	-2.53662	0.565052	-4.48918	7.15e-06	0.00061443
ENST00000479179.1	24.6516	-1.24183	0.276668	-4.4885	7.17e-06	0.00061509
ENST00000265087.9	10659.1	-1.62938	0.362999	-4.48867	7.17e-06	0.00061509
ENST00000480560.5	1.06837	-2.77313	0.617832	-4.48848	7.17e-06	0.00061509
ENST00000505733.5	307.409	0.977104	0.217682	4.48869	7.17e-06	0.00061509
ENST00000369524.5	16.4356	1.9706	0.439047	4.48835	7.18e-06	0.00061512
ENST00000329251.5	97422.9	0.636685	0.141858	4.48819	7.18e-06	0.00061525
ENST00000507110.6	2145.06	-1.07884	0.240403	-4.48765	7.2e-06	0.00061647
ENST00000537328.6	3667.92	0.637965	0.142164	4.48752	7.21e-06	0.00061649
ENST00000298585.3	1704.05	0.730547	0.162823	4.48677	7.23e-06	0.00061729
ENST00000242776.9	4106.71	0.936162	0.208642	4.48694	7.23e-06	0.00061729
ENST00000601097.1	85.4234	1.51335	0.337289	4.4868	7.23e-06	0.00061729
ENST00000085079.11	5762.58	0.863075	0.192356	4.48686	7.23e-06	0.00061729
ENST00000555787.1	1133.02	0.878347	0.195871	4.48433	7.31e-06	0.00062406
ENST00000429294.3	2255.58	1.02397	0.228375	4.48372	7.34e-06	0.00062548
ENST00000376145.8	462.223	0.896531	0.199975	4.48322	7.35e-06	0.0006266
ENST00000703982.1	28.7064	-2.0707	0.461968	-4.48235	7.38e-06	0.00062883
ENST00000468978.2	902.881	-1.36525	0.304617	-4.48186	7.4e-06	0.00062991
ENST00000526789.1	54.4385	1.39525	0.311356	4.4812	7.42e-06	0.00063109
ENST00000601387.5	42.1131	1.35457	0.302285	4.48111	7.43e-06	0.00063109
ENST00000270221.11	2208.41	0.845201	0.188611	4.48117	7.42e-06	0.00063109
ENST00000381020.8	2.31282	2.54766	0.568634	4.48031	7.45e-06	0.00063309
ENST00000564632.1	39.2111	1.47645	0.329558	4.48008	7.46e-06	0.00063324
ENST00000413077.3	94.9098	0.874289	0.195153	4.48003	7.46e-06	0.00063324
ENST00000305536.11	1289.14	0.530614	0.118443	4.47991	7.47e-06	0.00063324
ENST00000621097.4	217.075	0.816211	0.182272	4.47799	7.53e-06	0.00063825
ENST00000417570.6	144.435	1.51573	0.338484	4.478	7.53e-06	0.00063825
ENST00000568863.1	11.4205	-1.28413	0.286798	-4.47747	7.55e-06	0.00063947
ENST00000377602.5	1140.36	-1.49345	0.333565	-4.47725	7.56e-06	0.00063976
ENST00000505191.2	7.81583	1.96226	0.438337	4.47661	7.58e-06	0.00064133
ENST00000397747.5	505.424	0.997844	0.222912	4.4764	7.59e-06	0.00064161
ENST00000498717.2	18.146	0.933737	0.208618	4.47582	7.61e-06	0.00064302
ENST00000589120.1	381.848	0.968508	0.216407	4.47541	7.63e-06	0.00064374
ENST00000603986.6	150.791	1.11925	0.250093	4.47534	7.63e-06	0.00064374
ENST00000371620.4	1191.61	0.648797	0.144977	4.47518	7.63e-06	0.00064388
ENST00000421832.3	634.946	0.931426	0.208144	4.4749	7.64e-06	0.00064435
ENST00000587731.1	190.578	-0.71291	0.159372	-4.47325	7.7e-06	0.00064899
ENST00000528437.7	114.446	0.944492	0.211156	4.47296	7.71e-06	0.00064951
ENST00000463153.2	8.47064	1.64341	0.36744	4.4726	7.73e-06	0.00064974
ENST00000647876.1	354.024	-1.63195	0.364883	-4.47254	7.73e-06	0.00064974
ENST00000427451.5	105.318	-3.63677	0.813092	-4.47276	7.72e-06	0.00064974
ENST00000588992.5	92.8448	1.45819	0.326046	4.47234	7.74e-06	0.00064999
ENST00000560716.1	16.7644	2.61619	0.585072	4.47157	7.76e-06	0.00065199
ENST00000397778.7	1438.09	0.634577	0.141931	4.47101	7.78e-06	0.00065331
ENST00000686942.1	612.996	1.53356	0.34304	4.47048	7.8e-06	0.00065459
ENST00000379295.5	20.57	1.42852	0.319558	4.4703	7.81e-06	0.00065479
ENST00000410009.5	162.72	1.33103	0.297787	4.46975	7.83e-06	0.00065611
ENST00000596580.2	2126.79	-0.860041	0.192431	-4.46936	7.85e-06	0.00065697
ENST00000492068.2	86.5084	1.64925	0.369105	4.46822	7.89e-06	0.00065974
ENST00000600528.1	27.5232	1.06359	0.238031	4.46829	7.88e-06	0.00065974
ENST00000368190.7	227.017	1.59714	0.357491	4.46763	7.91e-06	0.00066119
ENST00000688159.2	10.1369	1.05723	0.236665	4.46718	7.93e-06	0.00066187
ENST00000545202.3	8.20729	-1.74048	0.389614	-4.4672	7.92e-06	0.00066187
ENST00000230990.7	393.695	0.617178	0.138182	4.4664	7.95e-06	0.00066392
ENST00000398136.7	16658.4	0.765964	0.171526	4.46558	7.99e-06	0.00066613
ENST00000620459.1	738.577	-1.07797	0.241468	-4.46423	8.04e-06	0.00066995
ENST00000703809.1	585.72	2.9622	0.663583	4.46395	8.05e-06	0.00067048
ENST00000459981.1	68.0766	-1.0266	0.230042	-4.46266	8.09e-06	0.00067416
ENST00000567838.1	33.6519	-1.69205	0.379172	-4.4625	8.1e-06	0.00067432
ENST00000349618.8	244.608	1.37612	0.308408	4.46201	8.12e-06	0.00067544
ENST00000481568.2	60.0454	0.932464	0.208989	4.46179	8.13e-06	0.00067544
ENST00000261588.10	2480.78	-0.481955	0.108016	-4.46189	8.12e-06	0.00067544
ENST00000616281.1	41.7604	-2.0306	0.455123	-4.46166	8.13e-06	0.00067548
ENST00000594259.1	175.836	1.94803	0.436735	4.46044	8.18e-06	0.00067897
ENST00000334194.4	1327.61	-2.30307	0.516351	-4.46028	8.19e-06	0.00067913
ENST00000360379.4	5.58162	4.47206	1.00275	4.45978	8.2e-06	0.00067999
ENST00000551351.5	4.92438	-1.67992	0.376678	-4.45984	8.2e-06	0.00067999
ENST00000607830.1	35.2195	0.855977	0.191946	4.45948	8.22e-06	0.00068056
ENST00000675497.1	19.394	-4.10717	0.921111	-4.45893	8.24e-06	0.00068159
ENST00000381297.10	472.908	1.04694	0.234798	4.45892	8.24e-06	0.00068159
ENST00000333323.6	189.628	0.721094	0.161757	4.45789	8.28e-06	0.00068452
ENST00000294507.4	20728.3	0.998335	0.224015	4.45655	8.33e-06	0.00068839
ENST00000534848.1	17.9631	3.62358	0.813109	4.45645	8.33e-06	0.00068839
ENST00000256953.6	1704.73	-1.43205	0.321367	-4.45614	8.34e-06	0.00068845
ENST00000610087.2	71.8957	-1.03714	0.232748	-4.45608	8.35e-06	0.00068845
ENST00000594552.5	701.113	2.12804	0.477539	4.45627	8.34e-06	0.00068845
ENST00000583487.1	146.41	2.2908	0.5142	4.45508	8.39e-06	0.00069131
ENST00000505637.1	15.4032	-2.22648	0.499807	-4.45469	8.4e-06	0.00069219
ENST00000693314.2	50.6936	1.05985	0.237966	4.45378	8.44e-06	0.00069472
ENST00000354275.2	960.034	-1.53104	0.34377	-4.45368	8.44e-06	0.00069472
ENST00000528492.1	22.8676	2.40152	0.539264	4.45333	8.45e-06	0.00069511
ENST00000481094.1	266.826	2.20027	0.494061	4.45344	8.45e-06	0.00069511
ENST00000592702.5	32.9921	2.25407	0.506179	4.4531	8.46e-06	0.00069547
ENST00000380027.5	26.5738	1.85165	0.415835	4.45286	8.47e-06	0.0006959
ENST00000308064.7	943.585	-1.12673	0.253047	-4.45266	8.48e-06	0.00069617
ENST00000477125.1	7.93382	-1.95588	0.439315	-4.4521	8.5e-06	0.0006976
ENST00000473347.1	17.2281	1.25135	0.281097	4.45169	8.52e-06	0.00069857
ENST00000601597.1	6.46874	1.40042	0.314611	4.45128	8.54e-06	0.00069954
ENST00000479851.1	11.5193	-1.14276	0.256734	-4.45115	8.54e-06	0.00069958
ENST00000648510.1	71.6479	-1.48328	0.333288	-4.45045	8.57e-06	0.0007015
ENST00000628340.1	10.1673	1.28868	0.289593	4.44997	8.59e-06	0.00070269
ENST00000375123.5	7.06331	1.82372	0.409853	4.44969	8.6e-06	0.00070285
ENST00000450895.2	15.8373	-1.96798	0.442265	-4.44978	8.6e-06	0.00070285
ENST00000470083.5	767.441	1.50166	0.337546	4.44877	8.64e-06	0.0007055
ENST00000340561.8	1.95334	2.05839	0.462709	4.44856	8.64e-06	0.00070582
ENST00000482149.5	229.947	1.34912	0.303317	4.44788	8.67e-06	0.00070768
ENST00000425118.5	717.075	0.772236	0.173647	4.44715	8.7e-06	0.00070933
ENST00000469820.1	114.11	-0.855849	0.192445	-4.44723	8.7e-06	0.00070933
ENST00000524036.1	25.7277	-1.22391	0.275222	-4.447	8.71e-06	0.00070945
ENST00000692131.2	10.6243	2.17081	0.488236	4.44622	8.74e-06	0.00071164
ENST00000530673.1	9.23605	2.88819	0.649646	4.44579	8.76e-06	0.0007127
ENST00000359902.2	274.835	1.60823	0.36177	4.44545	8.77e-06	0.00071345
ENST00000614441.1	22.7037	0.791153	0.177993	4.44486	8.79e-06	0.00071502
ENST00000652224.1	3.9178	2.30705	0.519127	4.4441	8.83e-06	0.00071717
ENST00000309988.9	115.382	1.39139	0.313101	4.44391	8.83e-06	0.00071743
ENST00000601655.5	324.212	1.00688	0.226588	4.44366	8.84e-06	0.00071788
ENST00000287008.8	2485.77	-0.845582	0.19038	-4.44156	8.93e-06	0.00072418
ENST00000529578.5	1756.68	1.50921	0.33979	4.44161	8.93e-06	0.00072418
ENST00000489623.1	108.917	0.851521	0.191725	4.44136	8.94e-06	0.00072447
ENST00000367023.5	282.579	1.23921	0.279065	4.44058	8.97e-06	0.00072673
ENST00000560573.1	166.068	1.40599	0.316653	4.44018	8.99e-06	0.00072769
ENST00000530721.5	14539.1	1.15723	0.260665	4.43955	9.01e-06	0.00072944
ENST00000404377.5	39.8322	1.07946	0.243168	4.43916	9.03e-06	0.00072999
ENST00000452368.7	2119.8	0.865066	0.19487	4.43919	9.03e-06	0.00072999
ENST00000466877.5	554.205	0.776324	0.174889	4.43895	9.04e-06	0.00073031
ENST00000382540.5	47.9063	1.81016	0.407895	4.43781	9.09e-06	0.00073379
ENST00000563041.5	10.2333	1.38821	0.312863	4.43711	9.12e-06	0.00073579
ENST00000571080.1	17.9174	1.24342	0.280252	4.43679	9.13e-06	0.00073652
ENST00000643589.1	31.8592	1.20087	0.270674	4.43658	9.14e-06	0.00073684
ENST00000554413.1	1.63945	2.19281	0.494286	4.43632	9.15e-06	0.00073736
ENST00000396101.7	35.248	1.13363	0.255591	4.43531	9.19e-06	0.00074004
ENST00000511288.1	80.5277	-0.962132	0.216923	-4.43535	9.19e-06	0.00074004
ENST00000532247.5	76.0853	1.11256	0.250883	4.43456	9.23e-06	0.00074222
ENST00000274532.7	70.0651	1.59416	0.35952	4.43415	9.24e-06	0.00074324
ENST00000530890.5	65.0255	2.14232	0.483239	4.43326	9.28e-06	0.00074595
ENST00000374940.4	2328.16	1.69237	0.381826	4.4323	9.32e-06	0.00074887
ENST00000378693.4	324.167	-1.82879	0.412683	-4.43146	9.36e-06	0.0007514
ENST00000466860.5	249.035	0.763047	0.172203	4.4311	9.38e-06	0.00075188
ENST00000697598.1	1.93057	2.45674	0.554431	4.43111	9.38e-06	0.00075188
ENST00000621082.2	25.4946	1.5471	0.349191	4.43052	9.4e-06	0.00075349
ENST00000531486.1	129.124	-0.577023	0.130259	-4.42981	9.43e-06	0.0007556
ENST00000367721.3	140.73	1.0974	0.247745	4.42955	9.44e-06	0.00075612
ENST00000380535.8	283.939	-0.730717	0.164971	-4.42938	9.45e-06	0.00075633
ENST00000640691.1	24.6871	-1.25589	0.283598	-4.42841	9.49e-06	0.00075933
ENST00000424809.6	349.182	0.856825	0.19351	4.42779	9.52e-06	0.00076111
ENST00000525593.5	64.7486	1.5287	0.345266	4.42759	9.53e-06	0.00076142
ENST00000548731.1	12.7248	1.36168	0.307582	4.42705	9.55e-06	0.00076295
ENST00000519865.5	90.8411	3.70084	0.836085	4.42639	9.58e-06	0.00076487
ENST00000459902.1	43.7373	1.2235	0.276428	4.42611	9.59e-06	0.00076546
ENST00000291700.9	580.981	1.46867	0.331864	4.42551	9.62e-06	0.00076723
ENST00000368748.5	2.90649	5.07429	1.14668	4.42521	9.63e-06	0.00076746
ENST00000368444.8	761.293	2.67864	0.605301	4.42531	9.63e-06	0.00076746
ENST00000637887.1	10.0425	0.822521	0.185877	4.42508	9.64e-06	0.00076754
ENST00000698349.1	3.10277	2.46292	0.556622	4.42477	9.65e-06	0.00076825
ENST00000546623.5	35.0152	1.14637	0.259087	4.42466	9.66e-06	0.00076826
ENST00000403262.6	2.13688	2.21953	0.50173	4.42376	9.7e-06	0.00077106
ENST00000390463.3	7.69342	1.38891	0.314055	4.42252	9.76e-06	0.00077511
ENST00000301459.5	478.017	1.33944	0.302913	4.42186	9.79e-06	0.00077705
ENST00000255616.8	542.651	0.874277	0.197737	4.42142	9.81e-06	0.00077825
ENST00000490139.1	9.53987	0.885907	0.200383	4.42108	9.82e-06	0.00077908
ENST00000703732.1	201.882	-0.628676	0.142223	-4.42037	9.85e-06	0.00078124
ENST00000338799.9	23.0349	-2.71539	0.614381	-4.41972	9.88e-06	0.00078316
ENST00000376630.5	45373.4	0.667692	0.151078	4.41951	9.89e-06	0.00078353
ENST00000261980.3	6.31998	1.97562	0.447072	4.41901	9.92e-06	0.00078493
ENST00000571637.1	23.418	1.39649	0.316104	4.41784	9.97e-06	0.00078882
ENST00000399881.8	9.89136	-3.31271	0.749878	-4.41767	9.98e-06	0.00078901
ENST00000396857.7	796.302	1.02254	0.231492	4.41717	1e-05	0.00079044
ENST00000608934.1	2.08675	1.98768	0.450052	4.41655	1e-05	0.00079189
ENST00000676712.2	2040.1	1.53004	0.346427	4.41661	1e-05	0.00079189
ENST00000436922.1	1.56834	3.10987	0.704159	4.41644	1e-05	0.0007919
ENST00000558467.1	86.1452	1.72151	0.389817	4.4162	1e-05	0.00079237
ENST00000686794.1	64.1259	1.29704	0.293761	4.41528	1.01e-05	0.00079534
ENST00000393340.7	10359.9	0.566325	0.128271	4.41505	1.01e-05	0.00079576
ENST00000447860.1	45.9265	-2.41188	0.546393	-4.41418	1.01e-05	0.00079858
ENST00000379852.8	5360.09	0.411974	0.09334	4.41369	1.02e-05	0.00079948
ENST00000676494.1	8.3934	-1.99251	0.451447	-4.4136	1.02e-05	0.00079948
ENST00000448504.6	1117.86	-0.663015	0.150217	-4.41372	1.02e-05	0.00079948
ENST00000524317.1	115.067	-1.87804	0.425613	-4.41255	1.02e-05	0.00080296
ENST00000702136.1	44.3216	1.61255	0.365461	4.41237	1.02e-05	0.0008032
ENST00000568788.1	1.85025	2.27282	0.515138	4.41207	1.02e-05	0.00080392
ENST00000221975.6	21450.4	0.919777	0.208499	4.41141	1.03e-05	0.00080595
ENST00000417977.2	14.0573	1.34983	0.306012	4.41103	1.03e-05	0.00080674
ENST00000559975.1	6.43651	2.86009	0.648403	4.41098	1.03e-05	0.00080674
ENST00000644549.1	2918.74	2.262	0.512832	4.4108	1.03e-05	0.00080698
ENST00000482740.2	462.491	-1.57546	0.357236	-4.41015	1.03e-05	0.00080902
ENST00000390542.6	1233.96	2.66704	0.604821	4.40964	1.04e-05	0.00081052
ENST00000311122.5	31.2092	0.86335	0.195824	4.40881	1.04e-05	0.00081318
ENST00000482556.5	2044.35	-1.47295	0.334143	-4.40815	1.04e-05	0.00081526
ENST00000270257.9	261.228	0.880873	0.199841	4.40788	1.04e-05	0.00081588
ENST00000291536.8	210.872	-1.03484	0.234797	-4.4074	1.05e-05	0.00081728
ENST00000374476.3	2.77095	-1.5786	0.358202	-4.40701	1.05e-05	0.0008183
ENST00000570132.1	244.203	-1.20423	0.273261	-4.40688	1.05e-05	0.0008184
ENST00000464123.5	5355.46	-1.70836	0.387691	-4.40651	1.05e-05	0.00081939
ENST00000537717.1	2.71539	-2.13471	0.484472	-4.40627	1.05e-05	0.00081987
ENST00000589625.5	67.2189	0.874794	0.198561	4.40566	1.05e-05	0.00082176
ENST00000508177.5	201.055	-0.547913	0.124375	-4.40533	1.06e-05	0.00082261
ENST00000495610.7	135.512	2.26548	0.514276	4.40518	1.06e-05	0.00082266
ENST00000282077.8	1010.12	0.83016	0.188457	4.40504	1.06e-05	0.00082266
ENST00000423691.2	173.903	1.85428	0.420951	4.40498	1.06e-05	0.00082266
ENST00000555199.1	26.142	1.22455	0.278004	4.4048	1.06e-05	0.00082295
ENST00000590402.1	104.907	-0.675586	0.153401	-4.40406	1.06e-05	0.00082535
ENST00000374902.9	1188.81	0.52336	0.118841	4.40386	1.06e-05	0.00082569
ENST00000472301.5	899.305	-0.696592	0.158188	-4.40359	1.06e-05	0.00082624
ENST00000461013.5	489.584	-0.997203	0.226457	-4.4035	1.07e-05	0.00082624
ENST00000302091.9	67.2595	-0.985884	0.223902	-4.4032	1.07e-05	0.00082694
ENST00000519088.5	186.616	0.959598	0.217965	4.40254	1.07e-05	0.00082864
ENST00000691749.1	21.5463	1.76908	0.401824	4.40261	1.07e-05	0.00082864
ENST00000371623.5	139.295	1.24814	0.283521	4.40227	1.07e-05	0.00082923
ENST00000558112.1	29.0369	2.2727	0.516274	4.40212	1.07e-05	0.00082939
ENST00000637629.1	12.7001	-2.57865	0.585843	-4.40161	1.07e-05	0.00083057
ENST00000686382.2	49.5486	0.690444	0.156862	4.40159	1.07e-05	0.00083057
ENST00000460742.6	18.2307	1.40379	0.318981	4.40085	1.08e-05	0.000833
ENST00000390361.3	15.0331	1.30125	0.295699	4.4006	1.08e-05	0.00083357
ENST00000515742.2	19.9391	0.893946	0.203157	4.40027	1.08e-05	0.00083438
ENST00000576518.1	88.3169	-1.84701	0.419875	-4.39895	1.09e-05	0.00083907
ENST00000523308.5	330.412	1.13128	0.257211	4.39826	1.09e-05	0.00084131
ENST00000592670.5	118.053	-1.20835	0.274756	-4.39791	1.09e-05	0.00084224
ENST00000413737.2	13.4194	1.77201	0.402932	4.3978	1.09e-05	0.00084226
ENST00000319854.7	610.86	-1.45998	0.331994	-4.39762	1.09e-05	0.00084255
ENST00000528736.1	41.3072	-0.992301	0.225661	-4.39731	1.1e-05	0.00084331
ENST00000278025.9	328.291	1.04846	0.238448	4.397	1.1e-05	0.00084394
ENST00000527673.2	29617.8	0.507008	0.115309	4.39693	1.1e-05	0.00084394
[truncated: 8,167 more rows]

## Sheet: S2 RNA edited sites significant
Uploaded_variation	class	False discovery rate	fold_change	log2_fold_change
chr1_1168162_T/C	responder	6.45e-07	0.950112	-0.0738305
chr1_1223251_A/G	non_responder	0.00636474	1.09915	0.136383
chr1_1319056_A/G	non_responder	1.29e-05	1.05319	0.0747635
chr1_1328077_T/C	non_responder	3.4e-07	1.04297	0.0606935
chr1_1353443_A/G	responder	2.56e-05	0.957152	-0.0631794
chr1_3477892_T/C	non_responder	2.43e-34	1.06012	0.0842237
chr1_3478076_A/G	non_responder	3.48e-12	1.15084	0.202686
chr1_3478110_T/C	non_responder	3.08e-16	1.09826	0.135223
chr1_3857154_A/G	non_responder	0.00438098	1.06774	0.0945559
chr1_11026660_A/G	responder	4.14e-16	0.777143	-0.363748
chr1_11027778_T/C	responder	1.16e-05	0.811952	-0.300533
chr1_17068118_T/C	responder	6.29e-06	0.857253	-0.222207
chr1_21563142_T/C	responder	5.15e-06	0.945031	-0.0815672
chr1_22661465_A/G	responder	7.52e-19	0.939125	-0.090611
chr1_23361685_A/G	responder	0.00223188	0.908465	-0.138498
chr1_23808231_T/C	responder	2.16e-08	0.873194	-0.195626
chr1_27234868_T/C	non_responder	3.68e-10	1.03915	0.0554084
chr1_27967540_T/C	non_responder	4.96e-14	1.07642	0.106246
chr1_29203187_T/C	responder	0.00086137	0.901985	-0.148824
chr1_31432883_T/C	non_responder	1.91e-07	1.03985	0.0563697
chr1_31434255_A/G	non_responder	5.15e-07	1.05157	0.0725471
chr1_38024563_T/C	non_responder	0.00132767	1.1066	0.146132
chr1_39528818_T/C	non_responder	1.86e-16	1.12147	0.165386
chr1_39626417_T/C	responder	3.12e-10	0.96159	-0.0565058
chr1_41510657_T/C	non_responder	1.14e-05	1.0482	0.0679169
chr1_43609556_T/C	non_responder	4.37e-06	1.03596	0.0509724
chr1_44215441_T/C	non_responder	0.00191159	1.23219	0.301222
chr1_56495682_T/C	non_responder	2.5e-10	1.08298	0.115008
chr1_70145664_A/G	non_responder	3.95e-08	1.08813	0.121847
chr1_150308112_T/C	non_responder	0.00040072	1.07917	0.109928
chr1_150647126_T/C	non_responder	3.83e-34	1.04124	0.0583029
chr1_154544095_T/C	non_responder	9.11e-06	1.04529	0.0639064
chr1_160217383_A/G	responder	0.00082998	0.902942	-0.147295
chr1_160543393_A/G	non_responder	0.00130726	1.12742	0.173026
chr1_160545165_T/C	non_responder	0.00310867	1.12735	0.172934
chr1_160546259_A/G	non_responder	0.00159284	1.17097	0.227701
chr1_161599238_A/G	responder	0.00632513	0.961548	-0.0565692
chr1_162785181_T/C	non_responder	5.29e-05	1.06518	0.0910972
chr1_164559633_T/C	non_responder	0.00474871	1.21017	0.275211
chr1_167423105_A/G	non_responder	0.00126444	1.12539	0.170427
chr1_171558183_A/G	responder	0.00112558	0.745466	-0.423786
chr1_172387297_A/G	non_responder	4.22e-13	1.11472	0.156686
chr1_180175953_A/G	non_responder	0.00016002	1.09346	0.128903
chr1_180176843_A/G	non_responder	0.00017895	1.12188	0.165913
chr1_200649110_T/C	responder	1.09e-24	0.964305	-0.052439
chr1_201998054_T/C	responder	8.9e-06	0.957664	-0.0624093
chr1_202143157_A/G	non_responder	0.00038433	1.06805	0.0949808
chr1_205017458_T/C	non_responder	4.53e-06	1.04871	0.0686123
chr1_205768322_T/C	responder	9.11e-08	0.949269	-0.0751117
chr1_205768653_T/C	responder	0.00111709	0.952881	-0.0696324
chr1_205769038_T/C	responder	3.34e-05	0.956281	-0.0644933
chr1_205770064_T/C	responder	0.00035385	0.962467	-0.0551905
chr1_212620271_T/C	non_responder	2.6e-05	1.14656	0.197311
chr10_249013_A/G	responder	2.54e-31	0.93951	-0.0900196
chr10_1043676_T/C	non_responder	0.00216339	1.08106	0.112448
chr10_3778595_T/C	non_responder	0.00667587	1.45881	0.544796
chr10_3783895_T/C	non_responder	0.00053549	1.12274	0.167024
chr10_5764910_T/C	non_responder	2.62e-19	1.05588	0.0784501
chr10_5936448_T/C	non_responder	3.35e-08	1.20548	0.269602
chr10_7807725_T/C	non_responder	0.00013889	1.28913	0.366394
chr10_12106287_T/C	non_responder	4.95e-38	1.08815	0.121872
chr10_12122386_A/G	non_responder	3.65e-05	1.06744	0.0941561
chr10_44372635_A/G	non_responder	2.3e-34	1.03559	0.0504541
chr10_80156034_T/C	non_responder	0.00012189	1.08998	0.124295
chr10_80156210_T/C	non_responder	0.00010258	1.10194	0.140049
chr10_80522222_T/C	responder	2.95e-32	0.923409	-0.114958
chr10_93503224_A/G	non_responder	5.11e-19	1.04781	0.0673775
chr10_97401208_A/G	responder	1.63e-15	0.955597	-0.0655264
chr10_118309605_T/C	responder	3.43e-09	0.902858	-0.147429
chr10_122424216_T/C	non_responder	0.00327262	1.1723	0.229348
chr11_290816_A/G	non_responder	0.00021086	1.26565	0.339881
chr11_295527_T/C	non_responder	0.00036684	1.27225	0.347386
chr11_1889477_T/C	responder	0.00074273	0.937593	-0.0929669
chr11_2132404_T/C	responder	8.47e-15	0.86028	-0.217121
chr11_5663545_A/G	non_responder	2.6e-10	1.0928	0.128029
chr11_6588561_T/C	non_responder	0.00506999	1.10793	0.147863
chr11_9280714_A/G	non_responder	3.4e-05	1.09734	0.134011
chr11_18531592_T/C	non_responder	1.04e-24	1.04929	0.0694086
chr11_19224307_T/C	non_responder	0.00103335	1.2329	0.302061
chr11_19949012_T/C	non_responder	9.61e-09	1.06047	0.0847057
chr11_34479619_T/C	non_responder	0.00156304	1.09137	0.126136
chr11_34480049_A/G	non_responder	0.00245395	1.07163	0.0998103
chr11_43645151_T/C	non_responder	6.11e-09	1.04521	0.063788
chr11_43864815_T/C	non_responder	0.00720938	1.17176	0.228683
chr11_61446448_T/C	non_responder	1.86e-05	1.17579	0.233632
chr11_61954112_T/C	responder	0.00304033	0.957464	-0.0627103
chr11_64229857_A/G	non_responder	3.5e-22	1.03663	0.0519049
chr11_65127730_A/G	responder	2.06e-07	0.889682	-0.168638
chr11_65374414_T/C	non_responder	1.64e-07	1.05267	0.0740484
chr11_65376604_T/C	non_responder	2.49e-24	1.04371	0.0617189
chr11_65406616_T/C	non_responder	3.5e-10	1.05737	0.0804835
chr11_65410279_T/C	non_responder	0.00499726	1.03903	0.0552363
chr11_65413412_A/G	non_responder	1.6e-12	1.05922	0.0829971
chr11_65432128_A/G	non_responder	3.43e-14	1.05699	0.0799658
chr11_65868582_T/C	non_responder	0.00692728	1.0355	0.050327
chr11_66230427_A/G	non_responder	0.00158143	1.03886	0.0550026
chr11_67793035_T/C	non_responder	0.00053274	1.09538	0.131432
chr11_71996419_T/C	non_responder	0.00067135	1.05081	0.0715031
chr11_72003032_T/C	non_responder	0.00016526	1.06595	0.0921448
chr11_72004172_T/C	non_responder	0.00075534	1.09752	0.134249
chr11_72006827_T/C	non_responder	0.0006508	1.05777	0.0810309
chr11_72008357_T/C	non_responder	0.00161517	1.0477	0.0672295
chr11_75525229_A/G	non_responder	5.23e-13	1.07134	0.0994104
chr11_75525288_A/G	non_responder	4.32e-14	1.06218	0.0870337
chr11_107326593_T/C	non_responder	0.00242052	1.21494	0.280883
chr11_114445358_A/G	responder	0.00659375	0.918018	-0.123406
chr11_118630246_A/G	responder	0.00132767	0.884366	-0.177284
chr11_120216210_T/C	responder	8.07e-08	0.816548	-0.29239
chr11_134247121_T/C	non_responder	2.31e-65	1.10473	0.143691
chr11_134260280_T/C	non_responder	9.2e-12	1.04503	0.0635479
chr12_6956472_T/C	non_responder	0.0003601	1.07761	0.107835
chr12_8241432_A/G	non_responder	1.7e-05	1.03961	0.056045
chr12_9421884_T/C	non_responder	3.58e-09	1.04535	0.0639852
chr12_31385417_T/C	responder	0.00757782	0.961001	-0.0573896
chr12_31982507_T/C	responder	0.0028585	0.944255	-0.0827517
chr12_31999676_A/G	responder	0.00468467	0.952564	-0.0701113
chr12_50748100_A/G	non_responder	0.00476884	1.04753	0.0669857
chr12_50980467_A/G	non_responder	4.7e-07	1.09899	0.136182
chr12_51007699_A/G	non_responder	6.46e-05	1.10623	0.145647
chr12_51051878_T/C	non_responder	1.6e-06	1.12814	0.173941
chr12_51211036_T/C	responder	0.00271475	0.890466	-0.167368
chr12_51288119_T/C	non_responder	0.00318968	1.121	0.164787
chr12_51352038_T/C	non_responder	0.00601225	1.1509	0.202756
chr12_52241659_T/C	responder	0.00717952	0.881789	-0.181495
chr12_53039152_A/G	non_responder	0.00127315	1.09039	0.12485
chr12_53043071_T/C	non_responder	0.00745777	1.19525	0.257317
chr12_53320712_A/G	non_responder	2.34e-07	1.03644	0.0516325
chr12_54856828_A/G	responder	1.68e-19	0.916083	-0.126449
chr12_57601306_T/C	non_responder	3.28e-27	1.05166	0.072667
chr12_78211655_A/G	non_responder	2.38e-07	1.06717	0.0937865
chr12_82352601_T/C	responder	0.00221141	0.840157	-0.251269
chr12_105168260_T/C	responder	9.8e-05	0.884231	-0.177505
chr12_124358479_A/G	non_responder	1.89e-06	1.04447	0.0627685
chr12_124359349_A/G	responder	0.00185601	0.959636	-0.0594404
chr12_128811818_T/C	non_responder	1.45e-05	1.05709	0.0800938
chr12_131140389_T/C	responder	7.93e-05	0.895169	-0.159768
chr13_19673031_A/G	non_responder	2.96e-19	1.05747	0.0806119
chr13_24434450_A/G	responder	2.8e-18	0.941164	-0.0874824
chr13_24886290_A/G	non_responder	0.00018577	1.03777	0.0534815
chr13_44403080_T/C	responder	0.00202065	0.955222	-0.0660921
chr13_72708597_T/C	responder	5.3e-23	0.953564	-0.068599
chr13_72709046_A/G	responder	5.14e-13	0.951338	-0.0719704
chr13_72727590_T/C	responder	5.95e-08	0.96271	-0.0548263
chr13_95074287_A/G	non_responder	0.00090777	1.12629	0.171581
chr13_95075526_T/C	non_responder	9.93e-06	1.11714	0.159812
chr13_98406318_A/G	responder	1.03e-08	0.92587	-0.111118
chr13_110501714_T/C	non_responder	5.11e-09	1.03557	0.0504268
chr13_110880991_A/G	non_responder	1.36e-30	1.04642	0.0654592
chr13_111282277_A/G	non_responder	2.96e-05	1.10744	0.147227
chr13_112882953_T/C	non_responder	2.63e-07	1.13272	0.179787
chr14_24302050_T/C	responder	4.65e-05	0.94594	-0.0801794
chr14_24307138_T/C	responder	0.00036684	0.951468	-0.0717734
chr14_24377551_A/G	non_responder	0.0025996	1.08888	0.122841
chr14_33924396_A/G	non_responder	0.00111545	1.04253	0.060095
chr14_33924897_T/C	non_responder	1.18e-05	1.1418	0.191312
chr14_60109151_A/G	responder	0.00027498	0.888795	-0.170077
chr14_64052317_A/G	responder	4.26e-05	0.889348	-0.16918
chr14_69711620_T/C	responder	7.16e-05	0.858186	-0.220637
chr14_73961583_A/G	responder	0.00070193	0.944019	-0.0831115
chr14_77236714_A/G	responder	0.00654024	0.851573	-0.231797
chr14_77327940_T/C	non_responder	0.00646029	1.16456	0.21979
chr14_77507639_T/C	non_responder	2.34e-29	1.07078	0.0986565
chr14_89796077_A/G	non_responder	0.00029958	1.19913	0.261983
chr14_90275268_T/C	non_responder	0.00026363	1.03747	0.0530694
chr14_96305622_A/G	non_responder	0.00107237	1.04905	0.0690855
chr14_100280865_T/C	non_responder	5.64e-20	1.06073	0.0850631
chr14_103697564_T/C	non_responder	2.92e-11	1.04019	0.0568466
chr14_105468704_A/G	non_responder	8.21e-43	1.05428	0.0762578
chr14_105487258_T/C	non_responder	1.11e-68	1.08063	0.111872
chr14_105587093_A/G	responder	8.9e-06	0.953573	-0.0685844
chr14_105587117_T/C	responder	9.99e-05	0.965492	-0.0506643
chr14_105737646_T/C	non_responder	4.33e-11	1.04277	0.0604189
chr15_28169519_T/C	non_responder	4.31e-08	1.04493	0.0634074
chr15_32521832_T/C	responder	8.17e-13	0.871847	-0.197854
chr15_41817025_T/C	responder	0.00016581	0.890022	-0.168087
chr15_42231867_T/C	non_responder	3.54e-06	1.06193	0.0866916
chr15_42283765_A/G	non_responder	1.54e-11	1.03899	0.0551812
chr15_42287750_T/C	non_responder	5.26e-13	1.04006	0.0566691
chr15_50365268_T/C	non_responder	2.7e-05	1.041	0.0579725
chr15_51910469_A/G	responder	7.54e-05	0.950207	-0.0736866
chr15_52239744_A/G	non_responder	0.00440342	1.13161	0.178375
chr15_59660183_A/G	non_responder	4.28e-38	1.05778	0.0810445
chr15_63069108_A/G	non_responder	0.00638875	1.19602	0.258237
chr15_64952977_T/C	non_responder	0.00142452	1.05504	0.0772919
chr15_72341590_A/G	non_responder	5.3e-09	1.04958	0.0698171
chr15_72345454_T/C	non_responder	1.53e-11	1.03814	0.0539983
chr15_72345787_T/C	non_responder	1.58e-08	1.04193	0.0592601
chr15_72346551_T/C	non_responder	3.82e-17	1.06485	0.0906512
chr15_76949227_T/C	non_responder	3.36e-07	1.07126	0.099315
chr15_76949410_T/C	non_responder	3.62e-14	1.08382	0.116122
chr15_80948328_A/G	non_responder	0.00306665	1.10508	0.144147
chr15_88631942_A/G	non_responder	0.00014682	1.18918	0.249968
chr15_93044800_T/C	responder	1.6e-12	0.949227	-0.0751747
chr16_789262_A/G	non_responder	7.57e-16	1.04642	0.0654646
chr16_1324523_A/G	non_responder	0.00202908	1.37119	0.455434
chr16_2226663_T/C	non_responder	1.54e-09	1.04976	0.0700552
chr16_4609301_T/C	non_responder	7.58e-36	1.04902	0.0690383
chr16_4613130_A/G	non_responder	2.31e-16	1.08986	0.124145
chr16_4699717_A/G	non_responder	7.85e-10	1.05739	0.080504
chr16_4890808_A/G	non_responder	5.37e-29	1.06587	0.0920281
chr16_8783363_T/C	non_responder	0.00035385	1.08625	0.119354
chr16_19502819_A/G	non_responder	0.00018577	1.19106	0.252251
chr16_23525363_T/C	non_responder	0.00732293	1.16018	0.214353
chr16_57366059_A/G	responder	0.00014968	0.934565	-0.0976337
chr16_87403158_A/G	non_responder	5.34e-05	1.08056	0.111776
chr16_88429246_A/G	responder	3.08e-07	0.916488	-0.125813
chr16_88716268_A/G	responder	0.00063663	0.891897	-0.165051
chr16_88725639_A/G	responder	0.00294387	0.887947	-0.171454
chr16_89303461_A/G	responder	0.00272682	0.87281	-0.196261
chr16_89694144_T/C	non_responder	1.15e-46	1.07398	0.102961
chr16_89696513_T/C	non_responder	7.2e-15	1.04179	0.0590697
chr16_89716581_A/G	non_responder	0.00466236	1.04026	0.0569452
chr17_2377640_T/C	non_responder	6.67e-05	1.11745	0.160209
chr17_3037465_A/G	non_responder	2.43e-05	1.073	0.10165
chr17_4164606_T/C	non_responder	5.56e-43	1.06141	0.0859849
chr17_4165877_T/C	non_responder	8.95e-35	1.0585	0.0820275
chr17_7389366_A/G	non_responder	7.69e-17	1.07581	0.105429
chr17_7559652_A/G	non_responder	0.00854374	1.27194	0.347026
chr17_8205013_A/G	responder	0.0006948	0.865663	-0.208122
chr17_8462811_T/C	non_responder	0.00273971	1.03958	0.056007
chr17_8466267_A/G	non_responder	0.00525302	1.04026	0.0569412
chr17_15718514_A/G	responder	0.00132594	0.936638	-0.0944359
chr17_19826182_T/C	responder	1.7e-05	0.937415	-0.0932408
chr17_42992530_T/C	non_responder	9.54e-12	1.04013	0.0567689
chr17_47048463_T/C	responder	0.00010983	0.823318	-0.280479
chr17_47056298_T/C	responder	2.97e-08	0.837992	-0.254992
chr17_47974796_T/C	non_responder	0.00079549	1.31354	0.393465
chr17_56829448_A/G	non_responder	0.00054765	1.12246	0.166667
chr17_62426531_A/G	non_responder	1.73e-06	1.04346	0.061378
chr17_62426560_T/C	responder	1.58e-05	0.95355	-0.0686201
chr17_62688863_A/G	responder	5.15e-26	0.954821	-0.0666979
chr17_64360180_A/G	responder	9.12e-11	0.926429	-0.110248
chr17_66804903_A/G	non_responder	7.9e-10	1.0652	0.09112
chr17_68207120_A/G	responder	1.71e-09	0.950651	-0.073013
chr17_72947851_T/C	non_responder	3.6e-31	1.03906	0.0552744
chr17_74952274_A/G	responder	2.49e-24	0.949259	-0.0751263
chr17_74955922_A/G	responder	0.00313585	0.942962	-0.0847287
chr17_75230722_T/C	responder	0.00656823	0.860137	-0.217362
chr17_75266212_T/C	non_responder	1.16e-10	1.17973	0.238451
chr17_75273449_A/G	non_responder	8.3e-11	1.18566	0.245695
chr17_75283543_A/G	non_responder	2.1e-07	1.0601	0.0842067
chr17_75502402_T/C	responder	0.00088013	0.933451	-0.099353
chr17_75591559_T/C	non_responder	1.58e-08	1.05022	0.0706859
chr17_76572221_T/C	non_responder	0.00088013	1.14572	0.196259
chr17_76734761_T/C	non_responder	1.37e-68	1.07821	0.108634
chr17_77092380_A/G	responder	3.43e-08	0.867005	-0.205888
chr17_77162255_A/G	responder	0.00084251	0.930442	-0.104012
chr17_78207519_T/C	non_responder	0.00269748	1.0725	0.100984
chr17_80104910_T/C	responder	0.00563846	0.783688	-0.351649
chr17_80200965_T/C	non_responder	0.00176582	1.25956	0.332924
chr17_81198167_A/G	non_responder	1.4e-16	1.03598	0.0509949
chr17_81199384_T/C	non_responder	2.11e-15	1.06138	0.0859395
chr17_81228665_A/G	non_responder	1.82e-21	1.06751	0.0942437
chr17_81541374_T/C	responder	2.58e-05	0.932318	-0.101107
chr17_81670319_T/C	responder	3.66e-10	0.899259	-0.153191
chr18_722894_T/C	non_responder	4.78e-22	1.05503	0.0772897
chr18_13666157_A/G	non_responder	6.08e-14	1.20238	0.265892
chr18_35281313_A/G	responder	0.00280974	0.934759	-0.0973338
chr18_35307969_A/G	responder	6.25e-06	0.908688	-0.138143
chr18_57027482_T/C	responder	0.0015304	0.892497	-0.164081
chr18_57029176_T/C	responder	0.00388478	0.903192	-0.146896
chr18_62368850_A/G	non_responder	4.03e-06	1.11031	0.150961
chr18_63504670_T/C	responder	0.00794862	0.863748	-0.211317
chr18_79973976_A/G	non_responder	2.17e-09	1.04635	0.0653608
chr19_288738_T/C	non_responder	0.00678953	1.13887	0.187598
chr19_538160_A/G	non_responder	0.00347692	1.08333	0.115479
chr19_1272041_T/C	non_responder	0.00244482	1.24374	0.314689
chr19_2512797_T/C	responder	0.00045118	0.834831	-0.260444
chr19_3962371_A/G	responder	9.34e-06	0.858624	-0.219901
chr19_3962751_T/C	responder	9.54e-12	0.79297	-0.334661
chr19_4945962_T/C	non_responder	0.00031724	1.11047	0.151174
chr19_5105066_A/G	responder	4.79e-08	0.919924	-0.120413
chr19_5111983_A/G	responder	2.76e-06	0.910695	-0.13496
chr19_7742141_A/G	responder	3.87e-12	0.840691	-0.250352
chr19_7742724_A/G	responder	0.0023806	0.862286	-0.213762
chr19_10572801_A/G	responder	0.00053549	0.962646	-0.0549226
chr19_10692116_A/G	responder	4.3e-30	0.898822	-0.153893
chr19_17395367_T/C	responder	0.00207351	0.884176	-0.177594
chr19_18364336_A/G	responder	4.61e-09	0.793179	-0.334282
chr19_27805723_A/G	responder	0.00020565	0.787526	-0.344601
chr19_32970942_A/G	responder	0.00016996	0.851236	-0.23237
chr19_32976714_T/C	responder	3.44e-06	0.856512	-0.223455
chr19_46382675_A/G	responder	2.84e-15	0.904767	-0.144382
chr19_47514159_T/C	non_responder	1.24e-14	1.16088	0.215224
chr19_48600751_A/G	responder	1.33e-09	0.918277	-0.122999
chr19_52924409_A/G	non_responder	0.00345676	1.19802	0.260656
chr19_54158305_T/C	responder	0.00088672	0.937551	-0.0930311
chr19_54168120_T/C	non_responder	7.93e-05	1.0491	0.0691553
chr19_55098014_A/G	responder	0.00383451	0.907817	-0.139527
chr19_55227266_T/C	non_responder	0.00686681	1.0619	0.0866455
chr19_55637711_T/C	non_responder	0.00051336	1.08188	0.113536
chr19_55639105_T/C	non_responder	6.78e-06	1.09078	0.125359
chr19_55649033_T/C	non_responder	0.00138174	1.05083	0.0715248
chr19_55654178_T/C	non_responder	0.0001582	1.06956	0.0970241
chr19_56442494_T/C	responder	0.00027409	0.942687	-0.0851492
chr19_57411296_T/C	non_responder	2.82e-06	1.0704	0.0981434
chr2_24241118_A/G	responder	4.8e-13	0.937463	-0.0931661
chr2_26385124_T/C	non_responder	4.01e-06	1.08811	0.121825
chr2_30642114_A/G	responder	0.00252506	0.80654	-0.310183
chr2_36846666_T/C	non_responder	5.21e-29	1.05403	0.0759184
chr2_42282878_A/G	non_responder	1.81e-18	1.07227	0.100664
chr2_55544025_A/G	responder	3.72e-05	0.898125	-0.155012
chr2_61294988_T/C	non_responder	0.00011157	1.04597	0.0648363
chr2_61348173_A/G	non_responder	0.00165735	1.03851	0.0545091
chr2_61839792_A/G	non_responder	0.00149486	1.04577	0.0645593
chr2_86158763_A/G	non_responder	0.0001399	1.07467	0.103887
chr2_86615711_T/C	responder	0.00597061	0.965791	-0.0502175
chr2_131487584_A/G	non_responder	8.25e-07	1.0599	0.0839309
chr2_159231304_T/C	non_responder	0.0077337	1.12979	0.17606
chr2_188595826_T/C	responder	0.00975999	0.924709	-0.112928
chr2_196134412_A/G	non_responder	3.11e-31	1.03566	0.0505505
chr2_210149269_A/G	non_responder	2.05e-09	1.04148	0.0586397
chr2_215360082_A/G	non_responder	6.4e-07	1.12925	0.175361
chr2_216148178_A/G	non_responder	0.00546245	1.14445	0.19466
chr2_219184665_A/G	non_responder	0.001876	1.03795	0.0537438
chr2_219221123_A/G	non_responder	0.00310398	1.04054	0.0573289
chr2_219635704_A/G	non_responder	1.95e-08	1.12133	0.165205
chr2_227325349_A/G	non_responder	1.6e-33	1.05505	0.0773082
chr2_227345419_A/G	non_responder	5.88e-08	1.03949	0.0558744
chr2_227345666_A/G	non_responder	3.49e-08	1.0366	0.051859
chr2_227345953_A/G	non_responder	4.8e-13	1.06442	0.0900675
chr2_227346358_T/C	non_responder	1.12e-17	1.08061	0.111849
chr2_237779601_A/G	responder	8.96e-22	0.963772	-0.0532366
chr20_25214873_A/G	non_responder	1.01e-06	1.04245	0.0599751
chr20_45931762_A/G	non_responder	0.00313585	1.12074	0.164446
chr20_48636612_T/C	non_responder	1.41e-28	1.05627	0.0789782
chr20_62129061_A/G	non_responder	1.26e-12	1.05477	0.0769322
chr20_62129129_T/C	non_responder	8.15e-11	1.04917	0.0692431
chr20_62132909_T/C	non_responder	0.00067786	1.04089	0.0578169
chr20_62134032_T/C	non_responder	0.00033102	1.04319	0.0610044
chr20_63640027_A/G	responder	0.00349043	0.962004	-0.0558853
chr20_63704982_T/C	non_responder	0.00741744	1.10386	0.142559
chr21_28575864_A/G	responder	0.00331413	0.902365	-0.148218
chr21_39192538_T/C	responder	1.41e-12	0.904162	-0.145347
chr21_39199320_A/G	responder	7.98e-22	0.905986	-0.142439
chr21_39345574_T/C	responder	0.00069369	0.940954	-0.0878036
chr22_20952112_A/G	non_responder	0.00202125	1.32254	0.403315
chr22_20952455_A/G	non_responder	0.00023915	1.36304	0.446831
chr22_22370026_T/C	responder	2.09e-05	0.950947	-0.0725634
chr22_22919795_T/C	responder	2.16e-13	0.78762	-0.344429
chr22_23970626_T/C	responder	9.8e-05	0.964041	-0.0528335
chr22_37761133_T/C	non_responder	0.00244324	1.2596	0.332965
chr22_37773013_A/G	non_responder	1.18e-06	1.17018	0.226734
chr22_43134976_A/G	responder	1.48e-09	0.839277	-0.252782
chr22_50211116_A/G	responder	0.0080673	0.912724	-0.131749
chr22_50441222_A/G	non_responder	0.00543722	1.21172	0.277055
chr3_3844896_A/G	non_responder	7.4e-20	1.10988	0.15041
chr3_9815830_A/G	responder	0.0086562	0.925375	-0.11189
chr3_9833773_T/C	responder	5.06e-07	0.898355	-0.154642
chr3_9934475_A/G	responder	6.83e-20	0.965104	-0.0512437
chr3_33090652_A/G	non_responder	0.00995544	1.17808	0.236433
chr3_42914781_T/C	non_responder	3.52e-05	1.04382	0.061878
chr3_43033379_A/G	non_responder	2.28e-09	1.04834	0.068107
chr3_49687375_T/C	responder	3.67e-05	0.864773	-0.209607
chr3_51663477_A/G	responder	5.84e-11	0.892892	-0.163443
chr3_58169237_A/G	responder	0.00356302	0.965085	-0.0512727
chr3_64096279_T/C	non_responder	1.28e-14	1.03738	0.0529467
chr3_67375303_A/G	non_responder	4.26e-07	1.13925	0.188081
chr3_101857331_T/C	non_responder	0.00543767	1.27746	0.35328
chr3_119648543_T/C	non_responder	4.53e-14	1.05158	0.0725627
chr3_119670348_T/C	non_responder	3.46e-09	1.05132	0.0722008
chr3_122572165_A/G	responder	9.06e-19	0.944078	-0.0830219
chr3_126450248_T/C	non_responder	0.00164188	1.10014	0.137691
chr3_151436878_T/C	non_responder	0.00014016	1.20979	0.274757
chr3_156706022_A/G	responder	2.76e-24	0.922286	-0.116713
chr3_183027343_A/G	responder	5.9e-06	0.93495	-0.0970384
chr3_183029764_A/G	responder	0.00282941	0.908672	-0.138168
chr3_183033342_A/G	responder	0.00066875	0.925801	-0.111225
chr4_779509_T/C	non_responder	0.00645335	1.06233	0.0872296
chr4_1241855_A/G	responder	3.23e-13	0.841623	-0.248754
chr4_1242394_A/G	responder	6.15e-09	0.839511	-0.252378
chr4_1243264_A/G	responder	0.00995544	0.875155	-0.192389
chr4_1246303_T/C	responder	4.22e-13	0.854051	-0.227606
chr4_1249785_T/C	responder	1.22e-06	0.854617	-0.22665
chr4_1250628_A/G	responder	9.96e-06	0.886784	-0.173346
chr4_6619377_A/G	non_responder	0.001989	1.05457	0.0766573
chr4_27021178_A/G	non_responder	4.15e-20	1.14193	0.191479
chr4_55425361_T/C	responder	0.00161697	0.750829	-0.413443
chr4_73125289_T/C	non_responder	3.29e-21	1.04689	0.0661129
chr4_99318162_T/C	responder	0.00371259	0.952406	-0.0703521
chr4_100398008_T/C	responder	4e-05	0.852161	-0.230802
chr4_121821062_T/C	responder	1.06e-11	0.953544	-0.068628
chr4_139509592_T/C	non_responder	8.93e-29	1.05236	0.0736275
chr4_155922137_T/C	non_responder	7.84e-11	1.10802	0.147983
chr4_157143886_T/C	non_responder	1.29e-13	1.04921	0.0693064
chr4_158905227_T/C	non_responder	1.58e-06	1.35172	0.434799
chr4_158906161_T/C	non_responder	8.47e-07	1.39721	0.482547
chr4_169096357_T/C	non_responder	4.9e-14	1.04891	0.0688898
chr5_1038411_A/G	non_responder	5.29e-07	1.03881	0.0549269
chr5_1057030_T/C	non_responder	5.6e-05	1.12386	0.168468
chr5_1058357_A/G	non_responder	4.44e-06	1.06622	0.0925116
chr5_1058442_T/C	non_responder	0.00012277	1.06427	0.0898618
chr5_1063072_T/C	non_responder	8.38e-07	1.05992	0.0839553
chr5_1076014_T/C	non_responder	3.2e-07	1.04526	0.0638608
chr5_10254705_A/G	non_responder	0.0083406	1.20056	0.263709
chr5_10264850_A/G	non_responder	0.00050772	1.20654	0.270873
chr5_43053144_T/C	responder	2.4e-05	0.958036	-0.0618476
chr5_55424396_T/C	non_responder	0.00085931	1.08868	0.122585
chr5_80437260_T/C	non_responder	1.51e-06	1.13777	0.186204
chr5_80478352_A/G	non_responder	1.02e-08	1.15917	0.213095
chr5_98795801_A/G	responder	0.00024727	0.784668	-0.349846
chr5_146510465_A/G	responder	1.18e-07	0.896966	-0.156875
chr5_157133570_T/C	responder	0.0012969	0.959292	-0.0599584
chr5_177490077_T/C	non_responder	0.00298162	1.04851	0.068334
chr5_178124175_T/C	non_responder	0.0001491	1.39142	0.476559
chr6_12294025_A/G	non_responder	0.00117082	1.15216	0.204337
chr6_18215072_T/C	responder	3.1e-05	0.905966	-0.142471
chr6_30012899_A/G	responder	0.00011374	0.905106	-0.143842
chr6_31145253_A/G	responder	0.00969567	0.822101	-0.282612
chr6_31892560_T/C	responder	0.0043254	0.818423	-0.289081
chr6_32220606_T/C	non_responder	4.64e-05	1.46097	0.546929
chr6_32643252_T/C	responder	0.00037106	0.789141	-0.341645
chr6_32746391_A/G	responder	0.00520565	0.767205	-0.382315
chr6_32950080_A/G	responder	9.27e-05	0.930548	-0.103848
chr6_34549985_A/G	non_responder	2.16e-10	1.2417	0.31232
chr6_42887660_T/C	non_responder	1.11e-68	1.05581	0.0783554
chr6_71374709_T/C	responder	0.00344641	0.885857	-0.174854
chr6_80344431_T/C	responder	0.00917739	0.856438	-0.223579
chr6_111269852_T/C	responder	0.00170288	0.904725	-0.144448
chr6_136337264_T/C	responder	0.00469443	0.884834	-0.176521
chr6_142770126_A/G	non_responder	7.81e-06	1.07036	0.098098
chr6_151880740_T/C	non_responder	4.01e-22	1.04427	0.0624935
chr7_5226215_T/C	non_responder	0.00105822	1.12341	0.167889
chr7_32579965_T/C	responder	0.00156812	0.95965	-0.0594197
chr7_32756543_T/C	responder	0.00200865	0.886185	-0.17432
chr7_42936258_A/G	non_responder	0.00886791	1.09268	0.127866
chr7_44798496_T/C	non_responder	4.66e-12	1.04528	0.0638846
chr7_55431365_A/G	responder	0.00021967	0.937719	-0.092773
chr7_64839247_T/C	non_responder	5.14e-06	1.06451	0.090187
chr7_64839460_T/C	non_responder	3.88e-08	1.06176	0.0864537
chr7_64840898_A/G	non_responder	1.12e-06	1.05518	0.0774844
chr7_64991321_T/C	responder	0.00042249	0.958959	-0.0604585
chr7_64991585_T/C	responder	0.00667587	0.959541	-0.0595837
chr7_64993237_T/C	responder	9.09e-06	0.948923	-0.0756365
chr7_75883744_A/G	responder	1.14e-05	0.944031	-0.0830945
chr7_102256842_T/C	responder	0.00164889	0.951853	-0.0711886
chr7_103100587_A/G	non_responder	9.61e-14	1.0498	0.0701182
chr7_130322520_A/G	non_responder	2.56e-08	1.04535	0.0639891
chr7_134970114_T/C	responder	3.03e-40	0.932828	-0.100317
chr7_135676210_A/G	responder	7.6e-05	0.949458	-0.0748242
chr7_151046954_A/G	responder	0.00041119	0.946596	-0.079179
chr7_151360848_A/G	non_responder	0.0008254	1.17516	0.232852
chr7_151378222_A/G	non_responder	0.00013522	1.23466	0.304108
chr8_8890384_A/G	responder	5.67e-12	0.929799	-0.105009
chr8_23018097_A/G	non_responder	0.00179081	1.0809	0.112232
chr8_23569135_A/G	responder	2.83e-06	0.956586	-0.0640333
chr8_24353579_T/C	non_responder	1.54e-07	1.04905	0.0690785
chr8_25345506_A/G	non_responder	2.31e-09	1.04858	0.0684394
chr8_30063309_T/C	non_responder	2.12e-07	1.17018	0.226727
chr8_30108003_T/C	non_responder	0.00622158	1.08751	0.121029
chr8_38128379_A/G	non_responder	0.00429518	1.05885	0.0824972
chr8_42328685_A/G	responder	0.0011624	0.947499	-0.0778033
chr8_64594769_A/G	non_responder	6.61e-06	1.10465	0.14359
chr8_116644542_T/C	non_responder	0.00917739	1.19518	0.257227
chr8_133230566_T/C	responder	8.02e-09	0.951063	-0.0723877
chr8_143262217_A/G	non_responder	0.00055939	1.15268	0.20499
chr8_143311289_T/C	non_responder	0.00221141	1.1176	0.160402
chr8_143592388_T/C	responder	0.00328437	0.906369	-0.14183
chr8_143595052_T/C	responder	0.00109186	0.910024	-0.136023
chr8_143642361_T/C	non_responder	0.00026535	1.03597	0.0509756
chr8_143868735_T/C	responder	0.00240952	0.83984	-0.251813
chr8_144454002_T/C	non_responder	0.00027966	1.03629	0.0514289
chr8_144455546_T/C	responder	0.00649197	0.817218	-0.291206
chr8_144458072_T/C	non_responder	2.43e-05	1.05802	0.0813735
chr9_742342_A/G	responder	3.75e-15	0.96402	-0.0528655
chr9_5968416_A/G	responder	2.21e-11	0.946122	-0.079902
chr9_35077444_T/C	responder	0.00440655	0.842928	-0.246518
chr9_37441811_A/G	non_responder	1.42e-16	1.0415	0.05866
chr9_72352681_A/G	non_responder	2.65e-09	1.0434	0.0612907
chr9_97680524_T/C	non_responder	6.16e-05	1.04938	0.0695425
chr9_112838568_T/C	non_responder	3.14e-13	1.04413	0.0622997
chr9_116705251_T/C	non_responder	0.00031724	1.15362	0.20617
chr9_127950212_T/C	responder	0.00999178	0.935275	-0.0965381
chr9_127952045_T/C	responder	1.93e-06	0.928476	-0.107063
chr9_128098587_T/C	non_responder	6.16e-06	1.04255	0.060123
chr9_128162247_T/C	responder	3.28e-08	0.957783	-0.0622297
chr9_128632018_A/G	non_responder	5.15e-07	1.03599	0.051011
chr9_130835417_T/C	responder	0.00017588	0.960283	-0.0584691
chr9_131259378_T/C	responder	2.62e-09	0.958593	-0.06101
chr9_131518776_A/G	non_responder	2.83e-06	1.06087	0.085254
chr9_131523391_A/G	non_responder	1.01e-06	1.05205	0.0732078
chr9_135487010_A/G	responder	7.39e-11	0.791643	-0.337077
chr9_136549537_T/C	responder	0.00200865	0.955327	-0.0659327
chr9_136722290_A/G	non_responder	1.55e-08	1.12098	0.164754
chr9_137007439_A/G	responder	1.58e-06	0.953588	-0.0685625
chr9_137007762_A/G	responder	9.43e-06	0.959974	-0.0589324
chr9_137050599_A/G	non_responder	0.00113393	1.08918	0.123242
chr9_137087175_A/G	non_responder	2.76e-13	1.04149	0.0586477
chr9_138176986_A/G	responder	0.00108176	0.863746	-0.211321
chrX_38803851_T/C	responder	0.00333942	0.849623	-0.235106
chrX_48581039_A/G	non_responder	2.53e-17	1.13349	0.180771
chrX_48601115_A/G	non_responder	6.01e-09	1.0392	0.0554775
chrX_48991032_A/G	non_responder	8.23e-21	1.05393	0.0757839
chrX_53178826_T/C	non_responder	8.7e-05	1.11102	0.151883
chrX_53197129_T/C	non_responder	2.46e-10	1.12138	0.165276
chrX_53236653_T/C	non_responder	0.00169802	1.06145	0.0860351
chrX_119618349_T/C	responder	0.00216339	0.825698	-0.276313
chrX_139726843_T/C	non_responder	0.00038092	1.07472	0.103959
chrX_153509287_A/G	non_responder	4.65e-14	1.04253	0.0600945
chrX_154412069_T/C	responder	4.31e-05	0.898386	-0.154593

## Sheet: S3 tDNA pvalue by gene 
Gene	Mutated_in_No	Not_Mutated_in_No	Mutated_in_Yes	Not_Mutated_in_Yes	P_value	FDR
RHOA	3	65	0	34	0.54891089	1
ZFHX3	6	62	3	31	1	1
CLTC	4	64	2	32	1	1
TMPRSS2	1	67	0	34	1	1
RECQL4	8	60	0	34	0.04942962	1
NOTCH1	10	58	1	33	0.09451625	1
GATA3	7	61	0	34	0.09206414	1
BCL9L	5	63	0	34	0.16635459	1
SMARCA4	4	64	0	34	0.29830583	1
RUNX1	1	67	1	33	1	1
EPHA3	2	66	0	34	0.55115512	1
BRD3	2	66	0	34	0.55115512	1
MAP2K4	2	66	0	34	0.55115512	1
CBFB	4	64	1	33	0.66245033	1
FBXW7	4	64	0	34	0.29830583	1
TP53	26	42	14	20	0.83126592	1
ERBB4	3	65	1	33	1	1
CCR4	1	67	0	34	1	1
ERBB3	3	65	1	33	1	1
TBX3	5	63	2	32	1	1
CDH1	7	61	0	34	0.09206414	1
ERBB2	6	62	1	33	0.41943776	1
SIX2	2	66	0	34	0.55115512	1
IKBKB	1	67	1	33	1	1
AKT1	5	63	1	33	0.66071038	1
AXIN2	2	66	0	34	0.55115512	1
CAMTA1	3	65	0	34	0.54891089	1
MTOR	3	65	1	33	1	1
SPEN	10	58	3	31	0.53573434	1
SDHB	1	67	0	34	1	1
ARHGEF10L	4	64	0	34	0.29830583	1
ARID1A	4	64	3	31	0.68332969	1
LCK	1	67	0	34	1	1
THRAP3	1	67	0	34	1	1
CSF3R	3	65	1	33	1	1
MPL	1	67	0	34	1	1
MUTYH	3	65	0	34	0.54891089	1
TAL1	1	67	0	34	1	1
STIL	2	66	2	32	0.5990319	1
JUN	2	66	0	34	0.55115512	1
JAK1	3	65	0	34	0.54891089	1
NOTCH2	3	65	0	34	0.54891089	1
PDE4DIP	2	66	0	34	0.55115512	1
ARNT	2	66	0	34	0.55115512	1
TPM3	1	67	0	34	1	1
PRCC	2	66	0	34	0.55115512	1
NTRK1	1	67	0	34	1	1
FCRL4	3	65	0	34	0.54891089	1
PRRX1	2	66	0	34	0.55115512	1
CDC73	2	66	0	34	0.55115512	1
ASPM	10	58	2	32	0.32830244	1
PTPRC	5	63	0	34	0.16635459	1
ELF3	1	67	1	33	1	1
MDM4	2	66	1	33	1	1
MYCN	2	66	0	34	0.55115512	1
NCOA1	3	65	1	33	1	1
DNMT3A	1	67	1	33	1	1
ALK	4	64	0	34	0.29830583	1
BIRC6	13	55	3	31	0.25111123	1
STRN	1	67	1	33	1	1
EPAS1	1	67	0	34	1	1
MSH2	2	66	1	33	1	1
MSH6	4	64	0	34	0.29830583	1
REL	2	66	0	34	0.55115512	1
XPO1	2	66	0	34	0.55115512	1
DCTN1	5	63	0	34	0.16635459	1
CTNNA2	3	65	1	33	1	1
PAX8	1	67	0	34	1	1
LRP1B	8	60	2	32	0.48935582	1
ACVR1	1	67	0	34	1	1
HOXD11	1	67	0	34	1	1
COL3A1	4	64	1	33	0.66245033	1
PMS1	3	65	0	34	0.54891089	1
SF3B1	5	63	0	34	0.16635459	1
IDH1	1	67	0	34	1	1
ATIC	3	65	0	34	0.54891089	1
FEV	2	66	0	34	0.55115512	1
SRGAP3	2	66	1	33	1	1
FANCD2	3	65	1	33	1	1
PPARG	2	66	0	34	0.55115512	1
RAF1	1	67	0	34	1	1
XPC	2	66	0	34	0.55115512	1
SETD2	4	64	2	32	1	1
BAP1	2	66	2	32	0.5990319	1
CACNA1D	6	62	0	34	0.1747907	1
STAG1	2	66	0	34	0.55115512	1
ATR	12	56	1	33	0.05540431	1
PIK3CA	19	49	6	28	0.33154971	1
MAP3K13	3	65	0	34	0.54891089	1
EIF4A2	1	67	0	34	1	1
LPP	1	67	0	34	1	1
TFRC	4	64	0	34	0.29830583	1
SLC34A2	4	64	1	33	0.66245033	1
N4BP2	2	66	2	32	0.5990319	1
FIP1L1	1	67	0	34	1	1
KIT	2	66	0	34	0.55115512	1
KDR	4	64	1	33	0.66245033	1
PTPN13	4	64	0	34	0.29830583	1
RAP1GDS1	1	67	1	33	1	1
FAT4	10	58	3	31	0.53573434	1
FAT1	7	61	2	32	0.71403926	1
TERT	1	67	3	31	0.10666667	1
CTNND2	2	66	0	34	0.55115512	1
LIFR	1	67	0	34	1	1
MAP3K1	13	55	2	32	0.08486258	1
PIK3R1	4	64	2	32	1	1
ACSL6	4	64	0	34	0.29830583	1
AFF4	1	67	0	34	1	1
ARHGAP26	2	66	0	34	0.55115512	1
CSF1R	1	67	1	33	1	1
PDGFRB	1	67	0	34	1	1
DEK	1	67	0	34	1	1
DAXX	2	66	0	34	0.55115512	1
NFKBIE	1	67	0	34	1	1
BMP5	5	63	1	33	0.66071038	1
PRDM1	1	67	2	32	0.2570297	1
ROS1	5	63	0	34	0.16635459	1
PTPRK	2	66	1	33	1	1
BCLAF1	1	67	0	34	1	1
TNFAIP3	1	67	0	34	1	1
ECT2L	1	67	1	33	1	1
ARID1B	3	65	1	33	1	1
AFDN	4	64	1	33	0.66245033	1
TNRC18	4	64	2	32	1	1
HOXA13	2	66	1	33	1	1
SFRP4	2	66	1	33	1	1
EGFR	3	65	1	33	1	1
HIP1	3	65	2	32	1	1
GRM3	3	65	0	34	0.54891089	1
AKAP9	6	62	2	32	0.71555228	1
TRRAP	6	62	1	33	0.41943776	1
CUX1	4	64	1	33	0.66245033	1
MET	4	64	0	34	0.29830583	1
POT1	1	67	0	34	1	1
SND1	2	66	1	33	1	1
SMO	2	66	2	32	0.5990319	1
TRIM24	3	65	0	34	0.54891089	1
KIAA1549	6	62	0	34	0.1747907	1
CNTNAP2	7	61	0	34	0.09206414	1
KMT2C	11	57	2	32	0.21031292	1
MNX1	3	65	2	32	1	1
ARHGEF10	1	67	0	34	1	1
PCM1	1	67	0	34	1	1
WRN	3	65	2	32	1	1
PREX2	3	65	0	34	0.54891089	1
NCOA2	6	62	0	34	0.1747907	1
NBN	2	66	0	34	0.55115512	1
PABPC1	4	64	0	34	0.29830583	1
UBR5	8	60	1	33	0.26552346	1
CSMD3	3	65	3	31	0.39750389	1
MYC	2	66	0	34	0.55115512	1
PLEC	12	56	1	33	0.05540431	1
NFIB	1	67	0	34	1	1
MLLT3	2	66	0	34	0.55115512	1
FANCG	1	67	0	34	1	1
WNK2	6	62	1	33	0.41943776	1
XPA	2	66	0	34	0.55115512	1
NR4A3	5	63	0	34	0.16635459	1
TNC	5	63	2	32	1	1
CNTRL	5	63	5	29	0.29467273	1
ABL1	2	66	0	34	0.55115512	1
NUP214	4	64	1	33	0.66245033	1
RXRA	1	67	0	34	1	1
MLLT10	4	64	0	34	0.29830583	1
ZEB1	4	64	0	34	0.29830583	1
KIF5B	2	66	0	34	0.55115512	1
RET	6	62	0	34	0.1747907	1
A1CF	1	67	0	34	1	1
PRF1	4	64	2	32	1	1
KAT6B	3	65	0	34	0.54891089	1
NFKB2	2	66	0	34	0.55115512	1
VTI1A	1	67	0	34	1	1
MUC6	3	65	0	34	0.54891089	1
NUP98	2	66	1	33	1	1
MYOD1	1	67	0	34	1	1
WT1	3	65	0	34	0.54891089	1
LMO2	2	66	0	34	0.55115512	1
DDB2	1	67	0	34	1	1
CLP1	1	67	0	34	1	1
PICALM	3	65	0	34	0.54891089	1
FAT3	10	58	4	30	0.7693772	1
ATM	4	64	1	33	0.66245033	1
KMT2A	5	63	3	31	1	1
FOXR1	1	67	0	34	1	1
ARHGEF12	2	66	0	34	0.55115512	1
CDKN1B	1	67	0	34	1	1
ETNK1	2	66	0	34	0.55115512	1
ARID2	2	66	2	32	0.5990319	1
COL2A1	3	65	2	32	1	1
KMT2D	6	62	1	33	0.41943776	1
PRPF40B	4	64	0	34	0.29830583	1
HOXC13	1	67	0	34	1	1
NACA	4	64	1	33	0.66245033	1
CHST11	3	65	0	34	0.54891089	1
ALDH2	2	66	0	34	0.55115512	1
SETD1B	4	64	0	34	0.29830583	1
CLIP1	4	64	0	34	0.29830583	1
NCOR2	3	65	4	30	0.21792029	1
POLE	4	64	0	34	0.29830583	1
ZMYM2	1	67	1	33	1	1
LATS2	1	67	0	34	1	1
FLT3	2	66	0	34	0.55115512	1
BRCA2	12	56	2	32	0.13339473	1
NBEA	5	63	2	32	1	1
RB1	2	66	3	31	0.33001504	1
ERCC5	3	65	0	34	0.54891089	1
ARHGAP5	1	67	0	34	1	1
BAZ1A	5	63	1	33	0.66071038	1
NIN	5	63	1	33	0.66071038	1
KTN1	2	66	0	34	0.55115512	1
DICER1	6	62	2	32	0.71555228	1
NUTM1	3	65	0	34	0.54891089	1
KNL1	5	63	0	34	0.16635459	1
MYO5A	6	62	0	34	0.1747907	1
TCF12	1	67	0	34	1	1
NTRK3	3	65	0	34	0.54891089	1
BLM	3	65	0	34	0.54891089	1
CHD2	2	66	1	33	1	1
AXIN1	3	65	0	34	0.54891089	1
TSC2	3	65	0	34	0.54891089	1
CREBBP	6	62	2	32	0.71555228	1
GRIN2A	3	65	0	34	0.54891089	1
CIITA	2	66	0	34	0.55115512	1
SNX29	2	66	0	34	0.55115512	1
ERCC4	4	64	0	34	0.29830583	1
MYH11	6	62	1	33	0.41943776	1
PRKCB	2	66	0	34	0.55115512	1
IL21R	2	66	0	34	0.55115512	1
CDH11	1	67	0	34	1	1
CBFA2T3	1	67	0	34	1	1
FANCA	3	65	2	32	1	1
POLR2A	2	66	0	34	0.55115512	1
NF1	4	64	1	33	0.66245033	1
TAF15	1	67	1	33	1	1
CDK12	6	62	1	33	0.41943776	1
IKZF3	1	67	1	33	1	1
RARA	2	66	1	33	1	1
STAT3	1	67	0	34	1	1
KAT7	1	67	0	34	1	1
COL1A1	2	66	2	32	0.5990319	1
HLF	1	67	1	33	1	1
PPM1D	2	66	0	34	0.55115512	1
CD79B	3	65	0	34	0.54891089	1
RNF213	12	56	4	30	0.56893232	1
ZNF521	4	64	0	34	0.29830583	1
SS18	1	67	0	34	1	1
FSTL3	2	66	0	34	0.55115512	1
MUC16	36	32	10	24	0.03442475	1
KEAP1	2	66	0	34	0.55115512	1
BRD4	4	64	0	34	0.29830583	1
TPM4	1	67	0	34	1	1
JAK3	2	66	0	34	0.55115512	1
CEP89	2	66	1	33	1	1
CEBPA	1	67	0	34	1	1
AKT2	2	66	0	34	0.55115512	1
CIC	2	66	1	33	1	1
ARHGAP35	4	64	2	32	1	1
BCL2L12	1	67	0	34	1	1
POLD1	2	66	1	33	1	1
ASXL1	4	64	0	34	0.29830583	1
SRC	1	67	0	34	1	1
TOP1	3	65	0	34	0.54891089	1
PLCG1	3	65	0	34	0.54891089	1
PTPRT	3	65	0	34	0.54891089	1
NFATC2	1	67	0	34	1	1
SALL4	4	64	1	33	0.66245033	1
OLIG2	1	67	0	34	1	1
CLTCL1	6	62	0	34	0.1747907	1
LZTR1	1	67	2	32	0.2570297	1
MAPK1	1	67	0	34	1	1
CHEK2	3	65	0	34	0.54891089	1
EWSR1	1	67	0	34	1	1
MRTFA	3	65	0	34	0.54891089	1
EP300	3	65	2	32	1	1
BCOR	1	67	0	34	1	1
USP9X	6	62	0	34	0.1747907	1
DDX3X	1	67	0	34	1	1
RBM10	2	66	1	33	1	1
SMC1A	2	66	1	33	1	1
MSN	1	67	0	34	1	1
IRS4	2	66	2	32	0.5990319	1
STAG2	3	65	2	32	1	1
ELF4	3	65	0	34	0.54891089	1
FLNA	3	65	3	31	0.39750389	1
PTEN	4	64	0	34	0.29830583	1
BCORL1	1	67	0	34	1	1
CTNNA1	3	65	0	34	0.54891089	1
OMD	1	67	0	34	1	1
SIX1	4	64	0	34	0.29830583	1
NCOR1	2	66	0	34	0.55115512	1
KDSR	1	67	0	34	1	1
PRKACA	2	66	0	34	0.55115512	1
GATA1	1	67	0	34	1	1
EPS15	1	67	0	34	1	1
ATP1A1	1	67	0	34	1	1
BCL11A	3	65	1	33	1	1
ACVR2A	2	66	0	34	0.55115512	1
CUL3	1	67	0	34	1	1
FOXL2	1	67	1	33	1	1
MECOM	1	67	1	33	1	1
MUC4	3	65	1	33	1	1
NSD2	2	66	0	34	0.55115512	1
APC	4	64	1	33	0.66245033	1
HLA-A	2	66	0	34	0.55115512	1
FOXO3	1	67	0	34	1	1
LATS1	1	67	1	33	1	1
HGF	3	65	1	33	1	1
ANK1	5	63	2	32	1	1
CCND1	2	66	0	34	0.55115512	1
KDM5A	2	66	1	33	1	1
NAB2	1	67	1	33	1	1
PRKD1	2	66	0	34	0.55115512	1
GOLGA5	1	67	1	33	1	1
RABEP1	2	66	0	34	0.55115512	1
FLCN	1	67	0	34	1	1
SPECC1	3	65	1	33	1	1
BCL3	1	67	1	33	1	1
SDC4	1	67	0	34	1	1
ATRX	3	65	0	34	0.54891089	1
PHF6	2	66	0	34	0.55115512	1
ATP2B3	4	64	0	34	0.29830583	1
KDM6A	1	67	2	32	0.2570297	1
PRDM2	2	66	1	33	1	1
RBM15	1	67	0	34	1	1
ABL2	3	65	0	34	0.54891089	1
ELK4	1	67	0	34	1	1
SLC45A3	1	67	1	33	1	1
FBLN2	1	67	0	34	1	1
TGFBR2	1	67	0	34	1	1
CTNNB1	1	67	0	34	1	1
POLQ	1	67	1	33	1	1
PIK3CB	1	67	0	34	1	1
GMPS	1	67	0	34	1	1
GOLPH3	1	67	0	34	1	1
IL6ST	1	67	0	34	1	1
PWWP2A	2	66	0	34	0.55115512	1
NPM1	1	67	0	34	1	1
FGFR4	1	67	0	34	1	1
MACC1	2	66	0	34	0.55115512	1
ELN	1	67	0	34	1	1
LYN	1	67	0	34	1	1
PLAG1	1	67	0	34	1	1
PAX5	1	67	0	34	1	1
FEN1	1	67	0	34	1	1
FADD	1	67	0	34	1	1
MAML2	1	67	0	34	1	1
SMARCD1	1	67	0	34	1	1
STAT6	1	67	1	33	1	1
FOXO1	1	67	0	34	1	1
HIF1A	1	67	0	34	1	1
BCL11B	1	67	1	33	1	1
BUB1B	2	66	0	34	0.55115512	1
FES	2	66	1	33	1	1
FUS	2	66	0	34	0.55115512	1
MLLT6	1	67	0	34	1	1
MALT1	1	67	0	34	1	1
VAV1	1	67	0	34	1	1
DNAJB1	2	66	1	33	1	1
DGCR8	1	67	0	34	1	1
NF2	3	65	0	34	0.54891089	1
MYH9	2	66	1	33	1	1
TFE3	2	66	0	34	0.55115512	1
AMER1	1	67	0	34	1	1
MED12	5	63	0	34	0.16635459	1
NONO	2	66	0	34	0.55115512	1
DCAF12L2	1	67	1	33	1	1
ERCC3	1	67	1	33	1	1
FHIT	1	67	0	34	1	1
RPN1	3	65	0	34	0.54891089	1
CDH10	2	66	0	34	0.55115512	1
PRDM16	1	67	0	34	1	1
PCBP1	1	67	1	33	1	1
RANBP2	2	66	0	34	0.55115512	1
VHL	1	67	0	34	1	1
TFG	1	67	0	34	1	1
ETV5	2	66	2	32	0.5990319	1
TP63	1	67	0	34	1	1
RAD17	1	67	0	34	1	1
FLT4	2	66	1	33	1	1
CCND3	1	67	0	34	1	1
EPHA7	4	64	0	34	0.29830583	1
FAM135B	2	66	2	32	0.5990319	1
CHD4	1	67	0	34	1	1
PTPRB	3	65	1	33	1	1
DCC	3	65	1	33	1	1
CALR	3	65	0	34	0.54891089	1
CASP9	2	66	0	34	0.55115512	1
ASXL2	1	67	1	33	1	1
AFF3	1	67	1	33	1	1
CD28	2	66	0	34	0.55115512	1
TET2	2	66	3	31	0.33001504	1
GOPC	1	67	0	34	1	1
EZH2	3	65	1	33	1	1
NTRK2	1	67	0	34	1	1
FANCC	1	67	1	33	1	1
TSC1	2	66	1	33	1	1
LRIG3	2	66	0	34	0.55115512	1
TRIP11	1	67	0	34	1	1
DDX5	2	66	0	34	0.55115512	1
CCNE1	1	67	1	33	1	1
MN1	1	67	1	33	1	1
ARAF	2	66	0	34	0.55115512	1
GPC3	1	67	1	33	1	1
FBXO11	1	67	1	33	1	1
FLI1	1	67	0	34	1	1
ZNF384	1	67	0	34	1	1
NKX2-1	2	66	0	34	0.55115512	1
EBF1	1	67	0	34	1	1
BCL10	1	67	0	34	1	1
SMAD3	1	67	0	34	1	1
RFWD3	1	67	0	34	1	1
SETBP1	2	66	1	33	1	1
HOOK3	1	67	0	34	1	1
RALGDS	1	67	0	34	1	1
SRSF2	1	67	1	33	1	1
BCR	1	67	0	34	1	1
DDIT3	1	67	0	34	1	1
CCNB1IP1	1	67	0	34	1	1
PALB2	2	66	0	34	0.55115512	1
BRCA1	2	66	2	32	0.5990319	1
MYD88	1	67	0	34	1	1
ITGAV	1	67	1	33	1	1
MLLT1	1	67	0	34	1	1
LEF1	1	67	0	34	1	1
MEN1	1	67	0	34	1	1
GLI1	1	67	0	34	1	1
PML	1	67	0	34	1	1
TPR	2	66	0	34	0.55115512	1
EML4	1	67	1	33	1	1
BARD1	1	67	0	34	1	1
NSD1	2	66	1	33	1	1
PMS2	1	67	0	34	1	1
GPC5	1	67	0	34	1	1
CPEB3	1	67	0	34	1	1
CTNND1	1	67	1	33	1	1
GPHN	1	67	0	34	1	1
PBRM1	2	66	1	33	1	1
SMAD4	1	67	0	34	1	1
ERC1	1	67	1	33	1	1
CDK6	1	67	0	34	1	1
PPFIBP1	1	67	0	34	1	1
MAP2K2	1	67	0	34	1	1
RUNX1T1	1	67	0	34	1	1
DROSHA	1	67	0	34	1	1
PTPN6	1	67	1	33	1	1
CRTC3	2	66	0	34	0.55115512	1
SS18L1	3	65	0	34	0.54891089	1
ZMYM3	1	67	1	33	1	1
HOXA9	1	67	0	34	1	1
HSP90AA1	2	66	0	34	0.55115512	1
NTHL1	1	67	0	34	1	1
WAS	1	67	0	34	1	1
KAT6A	1	67	1	33	1	1
BTK	1	67	0	34	1	1
CDX2	1	67	0	34	1	1
TRAF7	1	67	0	34	1	1
KDM5C	1	67	0	34	1	1
FGFR2	1	67	0	34	1	1
FOXA1	1	67	0	34	1	1
PPP2R1A	1	67	0	34	1	1
CNOT3	1	67	0	34	1	1
PTPRD	0	68	3	31	0.03485149	1
PDGFRA	0	68	1	33	0.33333333	1
ZNF429	0	68	1	33	0.33333333	1
CDKN2C	0	68	1	33	0.33333333	1
AFF1	0	68	1	33	0.33333333	1
ACVR1B	0	68	1	33	0.33333333	1
CBLB	0	68	1	33	0.33333333	1
USP8	0	68	3	31	0.03485149	1
FOXO4	0	68	2	32	0.10891089	1
SUZ12	0	68	2	32	0.10891089	1
NRG1	0	68	2	32	0.10891089	1
FAM47C	0	68	2	32	0.10891089	1
DDR2	0	68	1	33	0.33333333	1
WDCP	0	68	1	33	0.33333333	1
PAX7	0	68	1	33	0.33333333	1
JAK2	0	68	1	33	0.33333333	1
FANCE	0	68	1	33	0.33333333	1
NUMA1	0	68	2	32	0.10891089	1
EED	0	68	1	33	0.33333333	1
SIRPA	0	68	1	33	0.33333333	1
MLF1	0	68	1	33	0.33333333	1
EIF3E	0	68	1	33	0.33333333	1
PATZ1	0	68	2	32	0.10891089	1
NDRG1	0	68	1	33	0.33333333	1
CTCF	0	68	1	33	0.33333333	1
ZNF331	0	68	1	33	0.33333333	1
SMARCB1	0	68	1	33	0.33333333	1
ESR1	0	68	1	33	0.33333333	1
BRAF	0	68	1	33	0.33333333	1
TENT5C	0	68	1	33	0.33333333	1
ERCC2	0	68	1	33	0.33333333	1
IL7R	0	68	1	33	0.33333333	1
CXCR4	0	68	1	33	0.33333333	1
NCOA4	0	68	1	33	0.33333333	1
POLG	0	68	1	33	0.33333333	1
LMNA	0	68	1	33	0.33333333	1
TET1	0	68	2	32	0.10891089	1
RGS7	0	68	1	33	0.33333333	1
TMEM127	0	68	1	33	0.33333333	1
CREB3L1	0	68	1	33	0.33333333	1
LCP1	0	68	1	33	0.33333333	1
DNM2	0	68	1	33	0.33333333	1
TBL1XR1	0	68	1	33	0.33333333	1
FGFR3	0	68	1	33	0.33333333	1
RMI2	0	68	1	33	0.33333333	1
WIF1	0	68	1	33	0.33333333	1
CDH17	0	68	1	33	0.33333333	1
DDX10	0	68	1	33	0.33333333	1
BCL7A	0	68	1	33	0.33333333	1
FAS	0	68	1	33	0.33333333	1

## Sheet: S4 tDNA pvalue by variant
Variant_ID	Mutated_in_No	Not_Mutated_in_No	Mutated_in_Yes	Not_Mutated_in_Yes	P_value	FDR
chr3_49375481_49375481_Missense_Mutation	1	67	0	34	1	1
chr16_72957814_72957816_In_Frame_Del	2	66	1	33	1	1
chr17_59664827_59664827_Missense_Mutation	1	67	0	34	1	1
chr21_41471841_41471841_Missense_Mutation	1	67	0	34	1	1
chr8_144515803_144515803_Nonsense_Mutation	1	67	0	34	1	1
chr9_136519556_136519556_Missense_Mutation	2	66	0	34	0.5511551	1
chr10_8073826_8073866_Frame_Shift_Del	1	67	0	34	1	1
chr11_118901467_118901467_Missense_Mutation	1	67	0	34	1	1
chr19_10986948_10986949_Frame_Shift_Ins	1	67	0	34	1	1
chr21_34799437_34799438_Frame_Shift_Ins	1	67	0	34	1	1
chr3_89408078_89408078_Missense_Mutation	1	67	0	34	1	1
chr9_134048265_134048265_Missense_Mutation	1	67	0	34	1	1
chr17_12054991_12054992_Splice_Site	1	67	0	34	1	1
chr10_8069470_8069471_Splice_Site	2	66	0	34	0.5511551	1
chr16_67036663_67036664_In_Frame_Ins	1	67	0	34	1	1
chr4_152324309_152324309_Nonsense_Mutation	1	67	0	34	1	1
chr17_7673782_7673782_Missense_Mutation	1	67	0	34	1	1
chr2_211562064_211562064_Missense_Mutation	1	67	0	34	1	1
chr17_7674945_7674945_Nonsense_Mutation	2	66	0	34	0.5511551	1
chr3_32954161_32954161_Missense_Mutation	1	67	0	34	1	1
chr12_56098849_56098849_Missense_Mutation	1	67	0	34	1	1
chr12_114683074_114683075_Frame_Shift_Ins	1	67	0	34	1	1
chr16_68738307_68738307_Frame_Shift_Del	1	67	0	34	1	1
chr17_39723967_39723967_Missense_Mutation	1	67	0	34	1	1
chr2_45009030_45009030_Missense_Mutation	1	67	0	34	1	1
chr8_42329161_42329161_Missense_Mutation	1	67	0	34	1	1
chr14_104780214_104780214_Missense_Mutation	4	64	1	33	0.6624503	1
chr17_65557932_65557932_Missense_Mutation	1	67	0	34	1	1
chr19_10986497_10986497_Missense_Mutation	1	67	0	34	1	1
chr1_7745975_7745975_Missense_Mutation	1	67	0	34	1	1
chr1_11228865_11228865_Nonsense_Mutation	1	67	0	34	1	1
chr1_15872919_15872919_Missense_Mutation	1	67	0	34	1	1
chr1_15876582_15876582_Missense_Mutation	1	67	0	34	1	1
chr1_15929421_15929421_Missense_Mutation	1	67	0	34	1	1
chr1_15929497_15929497_Missense_Mutation	1	67	0	34	1	1
chr1_17053976_17053976_Missense_Mutation	1	67	0	34	1	1
chr1_17648603_17648603_Missense_Mutation	1	67	0	34	1	1
chr1_17696995_17696995_Missense_Mutation	1	67	0	34	1	1
chr1_26731502_26731502_Missense_Mutation	1	67	0	34	1	1
chr1_32274737_32274737_Missense_Mutation	1	67	0	34	1	1
chr1_36289350_36289350_Missense_Mutation	1	67	0	34	1	1
chr1_36471624_36471624_Missense_Mutation	1	67	0	34	1	1
chr1_36479492_36479492_Missense_Mutation	1	67	0	34	1	1
chr1_43346627_43346627_Missense_Mutation	1	67	0	34	1	1
chr1_45331440_45331440_Missense_Mutation	1	67	0	34	1	1
chr1_45331446_45331446_Missense_Mutation	1	67	0	34	1	1
chr1_47225645_47225645_Missense_Mutation	1	67	0	34	1	1
chr1_47269652_47269652_Missense_Mutation	1	67	0	34	1	1
chr1_47300151_47300151_Missense_Mutation	1	67	0	34	1	1
chr1_58782523_58782523_Missense_Mutation	1	67	0	34	1	1
chr1_58783007_58783007_Nonsense_Mutation	1	67	0	34	1	1
chr1_64841463_64841463_Missense_Mutation	1	67	0	34	1	1
chr1_64841548_64841548_Missense_Mutation	1	67	0	34	1	1
chr1_119953665_119953665_Missense_Mutation	1	67	0	34	1	1
chr1_119955145_119955145_Missense_Mutation	1	67	0	34	1	1
chr1_148966899_148966899_Missense_Mutation	1	67	0	34	1	1
chr1_148978317_148978317_Missense_Mutation	1	67	0	34	1	1
chr1_150823279_150823279_Missense_Mutation	1	67	0	34	1	1
chr1_154191215_154191215_Missense_Mutation	1	67	0	34	1	1
chr1_156768061_156768061_Missense_Mutation	1	67	0	34	1	1
chr1_156861001_156861001_Missense_Mutation	1	67	0	34	1	1
chr1_157586274_157586274_Missense_Mutation	1	67	0	34	1	1
chr1_157589285_157589285_Nonsense_Mutation	1	67	0	34	1	1
chr1_170664352_170664352_Missense_Mutation	1	67	0	34	1	1
chr1_170726323_170726323_Missense_Mutation	1	67	0	34	1	1
chr1_193135391_193135391_Nonsense_Mutation	1	67	0	34	1	1
chr1_197092008_197092008_Missense_Mutation	1	67	0	34	1	1
chr1_197096046_197096046_Missense_Mutation	1	67	0	34	1	1
chr1_197101584_197101584_Missense_Mutation	1	67	0	34	1	1
chr1_197103295_197103295_Missense_Mutation	1	67	0	34	1	1
chr1_197103301_197103301_Missense_Mutation	1	67	0	34	1	1
chr1_197103751_197103751_Missense_Mutation	1	67	0	34	1	1
chr1_198729153_198729153_Missense_Mutation	1	67	0	34	1	1
chr1_198734382_198734382_Missense_Mutation	1	67	0	34	1	1
chr1_198756029_198756029_Missense_Mutation	1	67	0	34	1	1
chr1_202012166_202012166_Missense_Mutation	1	67	0	34	1	1
chr1_204538209_204538209_Missense_Mutation	1	67	0	34	1	1
chr2_15942504_15942504_Missense_Mutation	1	67	0	34	1	1
chr2_15945621_15945621_Missense_Mutation	1	67	0	34	1	1
chr2_24697697_24697697_Missense_Mutation	1	67	0	34	1	1
chr2_24707375_24707375_Missense_Mutation	1	67	0	34	1	1
chr2_25241660_25241660_Missense_Mutation	1	67	0	34	1	1
chr2_29193236_29193236_Missense_Mutation	1	67	0	34	1	1
chr2_29209867_29209867_Missense_Mutation	1	67	0	34	1	1
chr2_32377626_32377626_Missense_Mutation	1	67	0	34	1	1
chr2_32415033_32415033_Nonsense_Mutation	1	67	0	34	1	1
chr2_32415447_32415447_Missense_Mutation	1	67	0	34	1	1
chr2_32467986_32467986_Missense_Mutation	1	67	0	34	1	1
chr2_32468456_32468456_Missense_Mutation	1	67	0	34	1	1
chr2_32469468_32469468_Nonsense_Mutation	1	67	0	34	1	1
chr2_36849562_36849562_Missense_Mutation	1	67	0	34	1	1
chr2_46346958_46346958_Missense_Mutation	1	67	0	34	1	1
chr2_47410293_47410293_Missense_Mutation	1	67	0	34	1	1
chr2_47475210_47475210_Missense_Mutation	1	67	0	34	1	1
chr2_47798925_47798925_Missense_Mutation	1	67	0	34	1	1
chr2_47800094_47800094_Missense_Mutation	1	67	0	34	1	1
chr2_47803674_47803674_Missense_Mutation	1	67	0	34	1	1
chr2_60894515_60894515_Missense_Mutation	1	67	0	34	1	1
chr2_60920082_60920082_Missense_Mutation	1	67	0	34	1	1
chr2_61488187_61488187_Missense_Mutation	1	67	0	34	1	1
chr2_74369420_74369420_Missense_Mutation	1	67	0	34	1	1
chr2_74371089_74371089_Missense_Mutation	1	67	0	34	1	1
chr2_80589325_80589325_Missense_Mutation	1	67	0	34	1	1
chr2_113241553_113241553_Missense_Mutation	1	67	0	34	1	1
chr2_140442623_140442623_Missense_Mutation	1	67	0	34	1	1
chr2_140444369_140444369_Missense_Mutation	1	67	0	34	1	1
chr2_140536620_140536620_Missense_Mutation	1	67	0	34	1	1
chr2_140841032_140841032_Missense_Mutation	1	67	0	34	1	1
chr2_157774150_157774150_Missense_Mutation	1	67	0	34	1	1
chr2_176108005_176108005_Missense_Mutation	1	67	0	34	1	1
chr2_189011706_189011706_Missense_Mutation	1	67	0	34	1	1
chr2_189863860_189863860_Missense_Mutation	1	67	0	34	1	1
chr2_197400362_197400362_Missense_Mutation	1	67	0	34	1	1
chr2_197400415_197400415_Missense_Mutation	1	67	0	34	1	1
chr2_208243526_208243526_Missense_Mutation	1	67	0	34	1	1
chr2_215346823_215346823_Missense_Mutation	1	67	0	34	1	1
chr2_218985045_218985045_Missense_Mutation	1	67	0	34	1	1
chr3_9025265_9025265_Missense_Mutation	1	67	0	34	1	1
chr3_9047466_9047466_Nonsense_Mutation	1	67	0	34	1	1
chr3_10087134_10087134_Missense_Mutation	1	67	0	34	1	1
chr3_10098771_10098771_Nonsense_Mutation	1	67	0	34	1	1
chr3_12406028_12406028_Missense_Mutation	1	67	0	34	1	1
chr3_12618703_12618703_Missense_Mutation	1	67	0	34	1	1
chr3_14156418_14156418_Missense_Mutation	1	67	0	34	1	1
chr3_47121061_47121061_Missense_Mutation	1	67	0	34	1	1
chr3_52407288_52407288_Missense_Mutation	1	67	0	34	1	1
chr3_53718349_53718349_Missense_Mutation	1	67	0	34	1	1
chr3_89399318_89399318_Missense_Mutation	1	67	0	34	1	1
chr3_136542133_136542133_Nonsense_Mutation	1	67	0	34	1	1
chr3_142505197_142505197_Missense_Mutation	1	67	0	34	1	1
chr3_142542696_142542696_Missense_Mutation	1	67	0	34	1	1
chr3_142558628_142558628_Missense_Mutation	1	67	0	34	1	1
chr3_142562510_142562510_Missense_Mutation	1	67	0	34	1	1
chr3_179234297_179234297_Missense_Mutation	8	60	1	33	0.2655235	1
chr3_185443524_185443524_Missense_Mutation	1	67	0	34	1	1
chr3_185480465_185480465_Missense_Mutation	1	67	0	34	1	1
chr3_186784675_186784675_Missense_Mutation	1	67	0	34	1	1
chr3_188872676_188872676_Missense_Mutation	1	67	0	34	1	1
chr3_196069481_196069481_Missense_Mutation	1	67	0	34	1	1
chr4_25662596_25662596_Missense_Mutation	1	67	0	34	1	1
chr4_25676139_25676139_Missense_Mutation	1	67	0	34	1	1
chr4_40120276_40120276_Missense_Mutation	1	67	0	34	1	1
chr4_53391063_53391063_Missense_Mutation	1	67	0	34	1	1
chr4_54723658_54723658_Missense_Mutation	1	67	0	34	1	1
chr4_55089713_55089713_Missense_Mutation	1	67	0	34	1	1
chr4_55098171_55098171_Missense_Mutation	1	67	0	34	1	1
chr4_55115283_55115283_Missense_Mutation	1	67	0	34	1	1
chr4_86701375_86701375_Missense_Mutation	1	67	0	34	1	1
chr4_86805321_86805321_Missense_Mutation	1	67	0	34	1	1
chr4_98392033_98392033_Missense_Mutation	1	67	0	34	1	1
chr4_125316676_125316676_Missense_Mutation	1	67	0	34	1	1
chr4_125317853_125317853_Missense_Mutation	1	67	0	34	1	1
chr4_125416523_125416523_Missense_Mutation	1	67	0	34	1	1
chr4_125468645_125468645_Missense_Mutation	1	67	0	34	1	1
chr4_125477306_125477306_Missense_Mutation	1	67	0	34	1	1
chr4_186619990_186619990_Missense_Mutation	1	67	0	34	1	1
chr4_186663456_186663456_Missense_Mutation	1	67	0	34	1	1
chr5_1294965_1294965_Missense_Mutation	1	67	0	34	1	1
chr5_11236695_11236695_Missense_Mutation	1	67	0	34	1	1
chr5_11346485_11346485_Missense_Mutation	1	67	0	34	1	1
chr5_38496493_38496493_Missense_Mutation	1	67	0	34	1	1
chr5_56864839_56864839_Missense_Mutation	1	67	0	34	1	1
chr5_56882060_56882060_Missense_Mutation	1	67	0	34	1	1
chr5_68295309_68295309_Missense_Mutation	1	67	0	34	1	1
chr5_131954301_131954301_Missense_Mutation	1	67	0	34	1	1
chr5_131959595_131959595_Missense_Mutation	1	67	0	34	1	1
chr5_132892354_132892354_Missense_Mutation	1	67	0	34	1	1
chr5_142770825_142770825_Missense_Mutation	1	67	0	34	1	1
chr5_150068238_150068238_Missense_Mutation	1	67	0	34	1	1
chr5_150130558_150130558_Missense_Mutation	1	67	0	34	1	1
chr6_18258325_18258325_Nonsense_Mutation	1	67	0	34	1	1
chr6_33319616_33319616_Missense_Mutation	1	67	0	34	1	1
chr6_44265019_44265019_Missense_Mutation	1	67	0	34	1	1
chr6_55760507_55760507_Missense_Mutation	1	67	0	34	1	1
chr6_55794387_55794387_Missense_Mutation	1	67	0	34	1	1
chr6_106106940_106106940_Missense_Mutation	1	67	0	34	1	1
chr6_117344139_117344139_Missense_Mutation	1	67	0	34	1	1
chr6_117365198_117365198_Missense_Mutation	1	67	0	34	1	1
chr6_117414546_117414546_Splice_Site	1	67	0	34	1	1
chr6_127973026_127973026_Missense_Mutation	1	67	0	34	1	1
chr6_136276231_136276231_Nonsense_Mutation	1	67	0	34	1	1
chr6_137880206_137880206_Missense_Mutation	1	67	0	34	1	1
chr6_138846630_138846630_Missense_Mutation	1	67	0	34	1	1
chr6_157201274_157201274_Missense_Mutation	1	67	0	34	1	1
chr6_167917215_167917215_Nonsense_Mutation	1	67	0	34	1	1
chr6_167951788_167951788_Missense_Mutation	1	67	0	34	1	1
chr7_5315001_5315001_Missense_Mutation	1	67	0	34	1	1
chr7_5345667_5345667_Missense_Mutation	1	67	0	34	1	1
chr7_5374469_5374469_Missense_Mutation	1	67	0	34	1	1
chr7_27199189_27199189_Missense_Mutation	1	67	0	34	1	1
chr7_27199608_27199608_Nonsense_Mutation	1	67	0	34	1	1
chr7_37916156_37916156_Missense_Mutation	1	67	0	34	1	1
chr7_37916172_37916172_Missense_Mutation	1	67	0	34	1	1
chr7_55143416_55143416_Missense_Mutation	1	67	0	34	1	1
chr7_55146618_55146618_Missense_Mutation	1	67	0	34	1	1
chr7_55171185_55171185_Missense_Mutation	1	67	0	34	1	1
chr7_75556047_75556047_Missense_Mutation	1	67	0	34	1	1
chr7_75738862_75738862_Missense_Mutation	1	67	0	34	1	1
chr7_86786339_86786339_Missense_Mutation	1	67	0	34	1	1
chr7_92002905_92002905_Missense_Mutation	1	67	0	34	1	1
chr7_92012460_92012460_Missense_Mutation	1	67	0	34	1	1
chr7_92080060_92080060_Missense_Mutation	1	67	0	34	1	1
chr7_92101028_92101028_Missense_Mutation	1	67	0	34	1	1
chr7_98985031_98985031_Missense_Mutation	1	67	0	34	1	1
chr7_98988842_98988842_Missense_Mutation	1	67	0	34	1	1
chr7_102273448_102273448_Missense_Mutation	1	67	0	34	1	1
chr7_116700053_116700053_Missense_Mutation	1	67	0	34	1	1
chr7_116758493_116758493_Missense_Mutation	1	67	0	34	1	1
chr7_124863603_124863603_Missense_Mutation	1	67	0	34	1	1
chr7_128091992_128091992_Splice_Site	1	67	0	34	1	1
chr7_128092005_128092005_Missense_Mutation	1	67	0	34	1	1
chr7_129208809_129208809_Nonsense_Mutation	1	67	0	34	1	1
chr7_129210371_129210371_Missense_Mutation	1	67	0	34	1	1
chr7_138515237_138515237_Missense_Mutation	1	67	0	34	1	1
chr7_138903611_138903611_Missense_Mutation	1	67	0	34	1	1
chr7_138917959_138917959_Missense_Mutation	1	67	0	34	1	1
chr7_146116896_146116896_Missense_Mutation	1	67	0	34	1	1
chr7_147121116_147121116_Missense_Mutation	1	67	0	34	1	1
chr7_152183055_152183055_Missense_Mutation	1	67	0	34	1	1
chr7_152185580_152185580_Nonsense_Mutation	1	67	0	34	1	1
chr7_152199302_152199302_Missense_Mutation	1	67	0	34	1	1
chr7_152252039_152252039_Missense_Mutation	1	67	0	34	1	1
chr7_156994139_156994139_Missense_Mutation	1	67	0	34	1	1
chr8_1896397_1896397_Missense_Mutation	1	67	0	34	1	1
chr8_17962038_17962038_Nonsense_Mutation	1	67	0	34	1	1
chr8_31064940_31064940_Missense_Mutation	1	67	0	34	1	1
chr8_31157438_31157438_Missense_Mutation	1	67	0	34	1	1
chr8_68217692_68217692_Missense_Mutation	1	67	0	34	1	1
chr8_70128974_70128974_Missense_Mutation	1	67	0	34	1	1
chr8_70156406_70156406_Missense_Mutation	1	67	0	34	1	1
chr8_70213927_70213927_Missense_Mutation	1	67	0	34	1	1
chr8_89955390_89955390_Missense_Mutation	1	67	0	34	1	1
chr8_100712433_100712433_Missense_Mutation	1	67	0	34	1	1
chr8_100717825_100717825_Missense_Mutation	1	67	0	34	1	1
chr8_102285676_102285676_Missense_Mutation	1	67	0	34	1	1
chr8_102346243_102346243_Missense_Mutation	1	67	0	34	1	1
chr8_112311102_112311102_Missense_Mutation	1	67	0	34	1	1
chr8_127738367_127738367_Missense_Mutation	1	67	0	34	1	1
chr8_127740746_127740746_Missense_Mutation	1	67	0	34	1	1
chr8_143918133_143918133_Missense_Mutation	1	67	0	34	1	1
chr8_143918696_143918696_Missense_Mutation	1	67	0	34	1	1
chr8_143920466_143920466_Missense_Mutation	1	67	0	34	1	1
chr8_143923626_143923626_Missense_Mutation	1	67	0	34	1	1
chr8_143925189_143925189_Missense_Mutation	1	67	0	34	1	1
chr8_143927562_143927562_Missense_Mutation	1	67	0	34	1	1
chr8_144511959_144511959_Missense_Mutation	1	67	0	34	1	1
chr8_144514307_144514307_Missense_Mutation	1	67	0	34	1	1
chr9_14398546_14398546_Nonsense_Mutation	1	67	0	34	1	1
chr9_20360801_20360801_Missense_Mutation	1	67	0	34	1	1
chr9_20365741_20365741_Nonsense_Mutation	1	67	0	34	1	1
chr9_35075633_35075633_Missense_Mutation	1	67	0	34	1	1
chr9_93256376_93256376_Missense_Mutation	1	67	0	34	1	1
chr9_93268721_93268721_Missense_Mutation	1	67	0	34	1	1
chr9_93306790_93306790_Missense_Mutation	1	67	0	34	1	1
chr9_97697235_97697235_Missense_Mutation	1	67	0	34	1	1
chr9_99847522_99847522_Missense_Mutation	1	67	0	34	1	1
chr9_99863802_99863802_Missense_Mutation	1	67	0	34	1	1
chr9_115063949_115063949_Missense_Mutation	1	67	0	34	1	1
chr9_121096456_121096456_Missense_Mutation	1	67	0	34	1	1
chr9_121144032_121144032_Missense_Mutation	1	67	0	34	1	1
chr9_121166119_121166119_Missense_Mutation	1	67	0	34	1	1
chr9_130885466_130885466_Missense_Mutation	1	67	0	34	1	1
chr9_131129303_131129303_Missense_Mutation	1	67	0	34	1	1
chr9_131163011_131163011_Missense_Mutation	1	67	0	34	1	1
chr9_131198926_131198926_Missense_Mutation	1	67	0	34	1	1
chr9_134401700_134401700_Missense_Mutation	1	67	0	34	1	1
chr9_136523959_136523959_Missense_Mutation	1	67	0	34	1	1
chr10_21614841_21614841_Missense_Mutation	1	67	0	34	1	1
chr10_21713897_21713897_Missense_Mutation	1	67	0	34	1	1
chr10_21713912_21713912_Missense_Mutation	1	67	0	34	1	1
chr10_31461213_31461213_Missense_Mutation	1	67	0	34	1	1
chr10_31520773_31520773_Nonsense_Mutation	1	67	0	34	1	1
chr10_31521165_31521165_Missense_Mutation	1	67	0	34	1	1
chr10_32028545_32028545_Missense_Mutation	1	67	0	34	1	1
chr10_43114657_43114657_Missense_Mutation	1	67	0	34	1	1
chr10_50811055_50811055_Missense_Mutation	1	67	0	34	1	1
chr10_70598742_70598742_Missense_Mutation	2	66	0	34	0.5511551	1
chr10_70598894_70598894_Missense_Mutation	1	67	0	34	1	1
chr10_74975848_74975848_Missense_Mutation	1	67	0	34	1	1
chr10_102401820_102401820_Missense_Mutation	1	67	0	34	1	1
chr10_112538304_112538304_Missense_Mutation	1	67	0	34	1	1
chr11_1025195_1025195_Missense_Mutation	1	67	0	34	1	1
chr11_3712595_3712595_Missense_Mutation	1	67	0	34	1	1
chr11_17720972_17720972_Missense_Mutation	1	67	0	34	1	1
chr11_32417627_32417627_Missense_Mutation	1	67	0	34	1	1
chr11_33859385_33859385_Nonsense_Mutation	1	67	0	34	1	1
chr11_47216381_47216381_Missense_Mutation	1	67	0	34	1	1
chr11_57659562_57659562_Missense_Mutation	1	67	0	34	1	1
chr11_86001073_86001073_Missense_Mutation	1	67	0	34	1	1
chr11_92354369_92354369_Missense_Mutation	1	67	0	34	1	1
chr11_92857254_92857254_Missense_Mutation	1	67	0	34	1	1
chr11_92866871_92866871_Missense_Mutation	1	67	0	34	1	1
chr11_108326127_108326127_Missense_Mutation	1	67	0	34	1	1
chr11_118498071_118498071_Missense_Mutation	1	67	0	34	1	1
chr11_118505685_118505685_Missense_Mutation	1	67	0	34	1	1
chr11_118898912_118898912_Missense_Mutation	1	67	0	34	1	1
chr11_118902721_118902721_Missense_Mutation	1	67	0	34	1	1
chr11_118907502_118907502_Missense_Mutation	1	67	0	34	1	1
chr11_118980695_118980695_Missense_Mutation	1	67	0	34	1	1
chr11_120479979_120479979_Missense_Mutation	1	67	0	34	1	1
chr12_12717897_12717897_Missense_Mutation	1	67	0	34	1	1
chr12_22643997_22643997_Missense_Mutation	1	67	0	34	1	1
chr12_22673563_22673563_Missense_Mutation	1	67	0	34	1	1
chr12_45850835_45850835_Missense_Mutation	1	67	0	34	1	1
chr12_47979515_47979515_Missense_Mutation	1	67	0	34	1	1
chr12_47992885_47992885_Missense_Mutation	1	67	0	34	1	1
chr12_49030766_49030766_Missense_Mutation	1	67	0	34	1	1
chr12_49030950_49030950_Missense_Mutation	1	67	0	34	1	1
chr12_49032788_49032788_Missense_Mutation	1	67	0	34	1	1
chr12_49634375_49634375_Missense_Mutation	1	67	0	34	1	1
chr12_53939207_53939207_Missense_Mutation	1	67	0	34	1	1
chr12_56101882_56101882_Nonsense_Mutation	1	67	0	34	1	1
chr12_56715895_56715895_Missense_Mutation	1	67	0	34	1	1
chr12_104601910_104601910_Missense_Mutation	1	67	0	34	1	1
chr12_104757713_104757713_Missense_Mutation	1	67	0	34	1	1
chr12_104757720_104757720_Missense_Mutation	1	67	0	34	1	1
chr12_111799997_111799997_Missense_Mutation	1	67	0	34	1	1
chr12_114671927_114671927_Missense_Mutation	1	67	0	34	1	1
chr12_114683134_114683134_Missense_Mutation	1	67	0	34	1	1
chr12_121822796_121822796_Missense_Mutation	1	67	0	34	1	1
chr12_122328316_122328316_Missense_Mutation	1	67	0	34	1	1
chr12_122377895_122377895_Missense_Mutation	1	67	0	34	1	1
chr12_122377921_122377921_Missense_Mutation	1	67	0	34	1	1
chr12_124400636_124400636_Nonsense_Mutation	1	67	0	34	1	1
chr12_124422507_124422507_Missense_Mutation	1	67	0	34	1	1
chr12_132635963_132635963_Missense_Mutation	1	67	0	34	1	1
chr12_132642923_132642923_Missense_Mutation	1	67	0	34	1	1
chr13_20002968_20002968_Missense_Mutation	1	67	0	34	1	1
chr13_20979732_20979732_Missense_Mutation	1	67	0	34	1	1
chr13_28024940_28024940_Missense_Mutation	1	67	0	34	1	1
chr13_32319277_32319277_Missense_Mutation	1	67	0	34	1	1
chr13_32339034_32339034_Missense_Mutation	1	67	0	34	1	1
chr13_32339598_32339598_Missense_Mutation	1	67	0	34	1	1
chr13_32339803_32339803_Missense_Mutation	1	67	0	34	1	1
chr13_32339831_32339831_Missense_Mutation	1	67	0	34	1	1
chr13_32355032_32355032_Missense_Mutation	1	67	0	34	1	1
chr13_35109386_35109386_Missense_Mutation	1	67	0	34	1	1
chr13_35232492_35232492_Missense_Mutation	1	67	0	34	1	1
chr13_35667440_35667440_Missense_Mutation	1	67	0	34	1	1
chr13_35668495_35668495_Missense_Mutation	1	67	0	34	1	1
chr13_48362877_48362877_Missense_Mutation	1	67	0	34	1	1
chr13_102853816_102853816_Missense_Mutation	1	67	0	34	1	1
chr13_102873326_102873326_Missense_Mutation	1	67	0	34	1	1
chr14_32093448_32093448_Missense_Mutation	1	67	0	34	1	1
chr14_34783769_34783769_Missense_Mutation	1	67	0	34	1	1
chr14_34792866_34792866_Missense_Mutation	1	67	0	34	1	1
chr14_50757484_50757484_Missense_Mutation	1	67	0	34	1	1
chr14_50778804_50778804_Missense_Mutation	1	67	0	34	1	1
chr14_55627976_55627976_Missense_Mutation	1	67	0	34	1	1
chr14_95091216_95091216_Missense_Mutation	1	67	0	34	1	1
chr14_95096266_95096266_Missense_Mutation	1	67	0	34	1	1
chr14_95103641_95103641_Nonsense_Mutation	1	67	0	34	1	1
chr14_95112234_95112234_Missense_Mutation	1	67	0	34	1	1
chr14_104775666_104775666_Missense_Mutation	1	67	0	34	1	1
chr15_34354646_34354646_Missense_Mutation	1	67	0	34	1	1
chr15_40621375_40621375_Missense_Mutation	1	67	0	34	1	1
chr15_40622211_40622211_Missense_Mutation	1	67	0	34	1	1
chr15_40651502_40651502_Missense_Mutation	1	67	0	34	1	1
chr15_40659362_40659362_Missense_Mutation	1	67	0	34	1	1
chr15_52313721_52313721_Missense_Mutation	1	67	0	34	1	1
chr15_52372231_52372231_Nonsense_Mutation	1	67	0	34	1	1
chr15_52405352_52405352_Missense_Mutation	1	67	0	34	1	1
chr15_52407296_52407296_Missense_Mutation	1	67	0	34	1	1
chr15_52408107_52408107_Missense_Mutation	1	67	0	34	1	1
chr15_57197785_57197785_Missense_Mutation	1	67	0	34	1	1
chr15_88032923_88032923_Missense_Mutation	1	67	0	34	1	1
chr15_90760172_90760172_Missense_Mutation	1	67	0	34	1	1
chr15_90760268_90760268_Missense_Mutation	1	67	0	34	1	1
chr15_92997386_92997386_Missense_Mutation	1	67	0	34	1	1
chr16_304325_304325_Missense_Mutation	1	67	0	34	1	1
chr16_2086280_2086280_Missense_Mutation	1	67	0	34	1	1
chr16_3728064_3728064_Nonsense_Mutation	1	67	0	34	1	1
chr16_3782821_3782821_Missense_Mutation	1	67	0	34	1	1
chr16_9764783_9764783_Missense_Mutation	1	67	0	34	1	1
chr16_10915595_10915595_Missense_Mutation	1	67	0	34	1	1
chr16_12027396_12027396_Missense_Mutation	1	67	0	34	1	1
chr16_13935504_13935504_Missense_Mutation	1	67	0	34	1	1
chr16_13948276_13948276_Missense_Mutation	1	67	0	34	1	1
chr16_15719622_15719622_Missense_Mutation	1	67	0	34	1	1
chr16_15720214_15720214_Missense_Mutation	1	67	0	34	1	1
chr16_15776143_15776143_Missense_Mutation	1	67	0	34	1	1
chr16_24174560_24174560_Missense_Mutation	1	67	0	34	1	1
chr16_27443080_27443080_Missense_Mutation	1	67	0	34	1	1
chr16_64998665_64998665_Missense_Mutation	1	67	0	34	1	1
chr16_68738326_68738326_Missense_Mutation	1	67	0	34	1	1
chr16_88877034_88877034_Missense_Mutation	1	67	0	34	1	1
chr16_89810775_89810775_Missense_Mutation	1	67	0	34	1	1
chr17_7502035_7502035_Missense_Mutation	1	67	0	34	1	1
chr17_7503756_7503756_Missense_Mutation	1	67	0	34	1	1
chr17_7673705_7673705_Missense_Mutation	1	67	0	34	1	1
chr17_31232117_31232117_Missense_Mutation	1	67	0	34	1	1
chr17_31334921_31334921_Missense_Mutation	1	67	0	34	1	1
chr17_35820375_35820375_Missense_Mutation	1	67	0	34	1	1
chr17_39519993_39519993_Missense_Mutation	1	67	0	34	1	1
chr17_39717454_39717454_Missense_Mutation	1	67	0	34	1	1
chr17_39777720_39777720_Missense_Mutation	1	67	0	34	1	1
chr17_40352435_40352435_Missense_Mutation	1	67	0	34	1	1
chr17_40354452_40354452_Nonsense_Mutation	1	67	0	34	1	1
chr17_42333750_42333750_Missense_Mutation	1	67	0	34	1	1
chr17_49798431_49798431_Missense_Mutation	1	67	0	34	1	1
chr17_50194440_50194440_Missense_Mutation	1	67	0	34	1	1
chr17_55320799_55320799_Nonsense_Mutation	1	67	0	34	1	1
chr17_59683156_59683156_Missense_Mutation	1	67	0	34	1	1
chr17_60623555_60623555_Missense_Mutation	1	67	0	34	1	1
chr17_60623571_60623571_Missense_Mutation	1	67	0	34	1	1
chr17_63929884_63929884_Missense_Mutation	1	67	0	34	1	1
chr17_63931367_63931367_Missense_Mutation	1	67	0	34	1	1
chr17_80346841_80346841_Missense_Mutation	1	67	0	34	1	1
chr17_80347344_80347344_Missense_Mutation	1	67	0	34	1	1
chr17_80381639_80381639_Missense_Mutation	1	67	0	34	1	1
chr17_80393440_80393440_Missense_Mutation	1	67	0	34	1	1
chr17_80393441_80393441_Missense_Mutation	1	67	0	34	1	1
chr18_25226622_25226622_Missense_Mutation	1	67	0	34	1	1
chr18_25226792_25226792_Missense_Mutation	1	67	0	34	1	1
chr18_25350939_25350939_Missense_Mutation	1	67	0	34	1	1
chr18_26078122_26078122_Missense_Mutation	1	67	0	34	1	1
chr19_681454_681454_Missense_Mutation	1	67	0	34	1	1
chr19_8949996_8949996_Missense_Mutation	1	67	0	34	1	1
chr19_8950741_8950741_Missense_Mutation	1	67	0	34	1	1
chr19_8953848_8953848_Missense_Mutation	1	67	0	34	1	1
chr19_8955289_8955289_Nonsense_Mutation	1	67	0	34	1	1
chr19_8955372_8955372_Missense_Mutation	1	67	0	34	1	1
chr19_8960330_8960330_Missense_Mutation	1	67	0	34	1	1
chr19_8965665_8965665_Missense_Mutation	1	67	0	34	1	1
chr19_8976902_8976902_Missense_Mutation	1	67	0	34	1	1
chr19_10486713_10486713_Missense_Mutation	1	67	0	34	1	1
chr19_10499820_10499820_Missense_Mutation	1	67	0	34	1	1
chr19_10996304_10996304_Missense_Mutation	1	67	0	34	1	1
chr19_11033489_11033489_Missense_Mutation	1	67	0	34	1	1
chr19_15255319_15255319_Missense_Mutation	1	67	0	34	1	1
chr19_16076612_16076612_Missense_Mutation	1	67	0	34	1	1
chr19_17831372_17831372_Missense_Mutation	1	67	0	34	1	1
chr19_17834942_17834942_Missense_Mutation	1	67	0	34	1	1
chr19_32918281_32918281_Missense_Mutation	1	67	0	34	1	1
chr19_33302332_33302332_Missense_Mutation	1	67	0	34	1	1
chr19_40255261_40255261_Missense_Mutation	1	67	0	34	1	1
chr19_42292975_42292975_Missense_Mutation	1	67	0	34	1	1
chr19_46920923_46920923_Missense_Mutation	1	67	0	34	1	1
chr19_49667098_49667098_Missense_Mutation	1	67	0	34	1	1
chr19_50414858_50414858_Missense_Mutation	1	67	0	34	1	1
chr20_32433430_32433430_Missense_Mutation	1	67	0	34	1	1
chr20_32437309_32437309_Missense_Mutation	1	67	0	34	1	1
chr20_37402785_37402785_Missense_Mutation	1	67	0	34	1	1
chr20_41097247_41097247_Missense_Mutation	1	67	0	34	1	1
chr20_41165319_41165319_Missense_Mutation	1	67	0	34	1	1
chr20_41169163_41169163_Missense_Mutation	1	67	0	34	1	1
chr20_42885904_42885904_Missense_Mutation	1	67	0	34	1	1
chr20_51474127_51474127_Missense_Mutation	1	67	0	34	1	1
chr20_51790319_51790319_Missense_Mutation	1	67	0	34	1	1
chr20_51791969_51791969_Missense_Mutation	1	67	0	34	1	1
chr21_33027572_33027572_Missense_Mutation	1	67	0	34	1	1
chr22_19180762_19180762_Missense_Mutation	1	67	0	34	1	1
chr22_19210387_19210387_Missense_Mutation	1	67	0	34	1	1
chr22_19222757_19222757_Missense_Mutation	1	67	0	34	1	1
chr22_19253963_19253963_Missense_Mutation	1	67	0	34	1	1
chr22_20991687_20991687_Missense_Mutation	1	67	0	34	1	1
chr22_21788330_21788330_Missense_Mutation	1	67	0	34	1	1
chr22_28725030_28725030_Missense_Mutation	1	67	0	34	1	1
chr22_28725050_28725050_Missense_Mutation	1	67	0	34	1	1
chr22_29291576_29291576_Missense_Mutation	1	67	0	34	1	1
chr22_40419305_40419305_Missense_Mutation	1	67	0	34	1	1
chr22_41157216_41157216_Missense_Mutation	1	67	0	34	1	1
chr22_41173690_41173690_Missense_Mutation	1	67	0	34	1	1
chrX_40074828_40074828_Missense_Mutation	1	67	0	34	1	1
chrX_41165939_41165939_Missense_Mutation	1	67	0	34	1	1
chrX_41168056_41168056_Missense_Mutation	1	67	0	34	1	1
chrX_41339074_41339074_Missense_Mutation	1	67	0	34	1	1
chrX_47176575_47176575_Missense_Mutation	1	67	0	34	1	1
chrX_47186344_47186344_Missense_Mutation	1	67	0	34	1	1
chrX_53405117_53405117_Missense_Mutation	1	67	0	34	1	1
chrX_65733260_65733260_Missense_Mutation	1	67	0	34	1	1
chrX_108733025_108733025_Missense_Mutation	1	67	0	34	1	1
chrX_124063939_124063939_Missense_Mutation	1	67	0	34	1	1
chrX_130074617_130074617_Missense_Mutation	1	67	0	34	1	1
chrX_154351627_154351627_Missense_Mutation	1	67	0	34	1	1
chr17_7673726_7673766_Frame_Shift_Del	1	67	0	34	1	1
chr2_140868259_140868259_Missense_Mutation	2	66	0	34	0.5511551	1
chr10_87933220_87933220_Missense_Mutation	1	67	0	34	1	1
chrX_130013481_130013481_Missense_Mutation	1	67	0	34	1	1
chr2_29239807_29239807_Missense_Mutation	1	67	0	34	1	1
chr5_138925357_138925357_Missense_Mutation	1	67	0	34	1	1
chr8_144517775_144517775_Missense_Mutation	1	67	0	34	1	1
chr9_92417362_92417362_Missense_Mutation	1	67	0	34	1	1
chr9_136505644_136505644_Missense_Mutation	1	67	0	34	1	1
chr11_92352624_92352624_Missense_Mutation	1	67	0	34	1	1
chr12_111792699_111792699_Nonsense_Mutation	1	67	0	34	1	1
chr14_60649136_60649136_Nonsense_Mutation	1	67	0	34	1	1
chr16_68823467_68823467_Missense_Mutation	1	67	0	34	1	1
chr17_7674945_7674945_Missense_Mutation	1	67	0	34	1	1
chr17_16108888_16108888_Nonsense_Mutation	1	67	0	34	1	1
chr18_63344429_63344429_Missense_Mutation	1	67	0	34	1	1
chr19_14097422_14097422_Missense_Mutation	1	67	0	34	1	1
chrX_48792044_48792044_Missense_Mutation	1	67	0	34	1	1
chr1_15931443_15931443_Missense_Mutation	1	67	0	34	1	1
chr1_51408191_51408191_Missense_Mutation	1	67	0	34	1	1
chr1_116388765_116388765_Missense_Mutation	1	67	0	34	1	1
chr2_32431058_32431058_Missense_Mutation	1	67	0	34	1	1
chr2_60461985_60461985_Missense_Mutation	1	67	0	34	1	1
chr2_147917337_147917337_Missense_Mutation	1	67	0	34	1	1
chr2_215312555_215312555_Missense_Mutation	1	67	0	34	1	1
chr2_224497839_224497839_Missense_Mutation	1	67	0	34	1	1
chr3_14145942_14145942_Nonstop_Mutation	1	67	0	34	1	1
chr3_52406263_52406263_Missense_Mutation	1	67	0	34	1	1
chr3_138946107_138946107_Missense_Mutation	1	67	0	34	1	1
chr3_169089072_169089072_Missense_Mutation	1	67	0	34	1	1
chr3_195789458_195789458_Missense_Mutation	1	67	0	34	1	1
chr4_1974879_1974879_Missense_Mutation	1	67	0	34	1	1
chr4_40120786_40120786_Missense_Mutation	1	67	0	34	1	1
chr4_186614253_186614253_Missense_Mutation	2	66	0	34	0.5511551	1
chr5_112827972_112827972_Missense_Mutation	1	67	0	34	1	1
chr5_112839693_112839693_Missense_Mutation	1	67	0	34	1	1
chr6_29942881_29942881_Missense_Mutation	1	67	0	34	1	1
chr6_108663938_108663938_Missense_Mutation	1	67	0	34	1	1
chr6_149683927_149683927_Missense_Mutation	1	67	0	34	1	1
chr7_81706407_81706407_Missense_Mutation	1	67	0	34	1	1
chr7_92045076_92045076_Missense_Mutation	1	67	0	34	1	1
chr7_102239496_102239496_Missense_Mutation	1	67	0	34	1	1
chr7_116796101_116796101_Missense_Mutation	1	67	0	34	1	1
chr8_41692751_41692751_Missense_Mutation	1	67	0	34	1	1
chr8_70148472_70148472_Missense_Mutation	1	67	0	34	1	1
chr8_102360170_102360170_Nonsense_Mutation	1	67	0	34	1	1
chr8_143922803_143922803_Missense_Mutation	1	67	0	34	1	1
chr9_93229714_93229714_Missense_Mutation	1	67	0	34	1	1
chr9_97693711_97693711_Missense_Mutation	1	67	0	34	1	1
chr9_136506913_136506913_Missense_Mutation	1	67	0	34	1	1
chr11_32427984_32427984_Missense_Mutation	1	67	0	34	1	1
chr11_69648075_69648075_Missense_Mutation	1	67	0	34	1	1
chr12_295601_295601_Missense_Mutation	1	67	0	34	1	1
chr12_295616_295616_Missense_Mutation	1	67	0	34	1	1
chr12_45852652_45852652_Missense_Mutation	1	67	0	34	1	1
chr12_57091517_57091517_Missense_Mutation	1	67	0	34	1	1
chr13_35161850_35161850_Missense_Mutation	1	67	0	34	1	1
chr14_29638708_29638708_Missense_Mutation	1	67	0	34	1	1
chr14_34783823_34783823_Missense_Mutation	1	67	0	34	1	1
chr14_92839371_92839371_Missense_Mutation	1	67	0	34	1	1
chr15_34355791_34355791_Missense_Mutation	1	67	0	34	1	1
chr16_346647_346647_Missense_Mutation	1	67	0	34	1	1
chr16_3774649_3774649_Missense_Mutation	1	67	0	34	1	1
chr16_10906629_10906629_Missense_Mutation	1	67	0	34	1	1
chr16_24185168_24185168_Missense_Mutation	1	67	0	34	1	1
chr16_72795528_72795528_Missense_Mutation	1	67	0	34	1	1
chr16_72797754_72797754_Missense_Mutation	1	67	0	34	1	1
chr16_89799612_89799612_Missense_Mutation	1	67	0	34	1	1
chr17_5365137_5365137_Missense_Mutation	1	67	0	34	1	1
chr17_17222629_17222629_Missense_Mutation	1	67	0	34	1	1
chr17_20204824_20204824_Missense_Mutation	1	67	0	34	1	1
chr17_31336782_31336782_Missense_Mutation	1	67	0	34	1	1
chr19_8960119_8960119_Missense_Mutation	1	67	0	34	1	1
chr19_8961492_8961492_Nonsense_Mutation	1	67	0	34	1	1
chr19_44758361_44758361_Missense_Mutation	1	67	0	34	1	1
chr19_50417220_50417220_Missense_Mutation	1	67	0	34	1	1
chr20_41098306_41098306_Missense_Mutation	1	67	0	34	1	1
chr20_45327269_45327269_Missense_Mutation	1	67	0	34	1	1
chr20_51790289_51790289_Missense_Mutation	1	67	0	34	1	1
chr22_19183433_19183433_Missense_Mutation	1	67	0	34	1	1
chr22_28696949_28696949_Missense_Mutation	1	67	0	34	1	1
chrX_41168122_41168122_Missense_Mutation	1	67	0	34	1	1
chrX_77684083_77684083_Missense_Mutation	1	67	0	34	1	1
chrX_124056190_124056190_Missense_Mutation	1	67	0	34	1	1
chrX_134393598_134393598_Missense_Mutation	1	67	0	34	1	1
chrX_134415040_134415040_Missense_Mutation	1	67	0	34	1	1
chrX_153580131_153580131_Nonsense_Mutation	1	67	0	34	1	1
chrX_154353652_154353652_Missense_Mutation	1	67	0	34	1	1
chr10_70598855_70598855_Missense_Mutation	1	67	0	34	1	1
chr11_86014925_86014925_Missense_Mutation	1	67	0	34	1	1
chr15_34356001_34356001_Missense_Mutation	1	67	0	34	1	1
chr17_7675209_7675209_Missense_Mutation	1	67	0	34	1	1
chr18_25227032_25227032_Missense_Mutation	1	67	0	34	1	1
chrX_45085924_45085924_Nonsense_Mutation	1	67	0	34	1	1
chr19_8976457_8976457_Missense_Mutation	1	67	0	34	1	1
chr22_19233264_19233264_Missense_Mutation	1	67	0	34	1	1
chr10_8073992_8073993_Frame_Shift_Ins	1	67	0	34	1	1
chr1_7091314_7091314_Missense_Mutation	1	67	0	34	1	1
chr1_13779424_13779424_Missense_Mutation	1	67	0	34	1	1
chr1_15932725_15932725_Missense_Mutation	1	67	0	34	1	1
chr1_17664546_17664546_Missense_Mutation	1	67	0	34	1	1
chr1_17664589_17664589_Missense_Mutation	1	67	0	34	1	1
chr1_110340583_110340583_Missense_Mutation	1	67	0	34	1	1
chr1_156767868_156767868_Missense_Mutation	1	67	0	34	1	1
chr1_179107820_179107820_Missense_Mutation	1	67	0	34	1	1
chr1_197101426_197101426_Missense_Mutation	1	67	0	34	1	1
chr1_204542896_204542896_Missense_Mutation	1	67	0	34	1	1
chr1_205618988_205618988_Missense_Mutation	1	67	0	34	1	1
chr1_205663571_205663571_Missense_Mutation	1	67	0	34	1	1
chr2_32436168_32436168_Missense_Mutation	1	67	0	34	1	1
chr2_32479533_32479533_Missense_Mutation	1	67	0	34	1	1
chr2_32515349_32515349_Missense_Mutation	1	67	0	34	1	1
chr2_32515367_32515367_Missense_Mutation	1	67	0	34	1	1
chr2_32607493_32607493_Missense_Mutation	1	67	0	34	1	1
chr2_47800945_47800945_Missense_Mutation	1	67	0	34	1	1
chr2_60460483_60460483_Missense_Mutation	1	67	0	34	1	1
chr2_60546037_60546037_Missense_Mutation	1	67	0	34	1	1
chr2_74367369_74367369_Missense_Mutation	1	67	0	34	1	1
chr2_197392380_197392380_Missense_Mutation	1	67	0	34	1	1
chr2_197423856_197423856_Missense_Mutation	1	67	0	34	1	1
chr2_211383854_211383854_Missense_Mutation	1	67	0	34	1	1
chr3_13636514_13636514_Missense_Mutation	1	67	0	34	1	1
chr3_30672201_30672201_Missense_Mutation	1	67	0	34	1	1
chr3_41224574_41224574_Missense_Mutation	1	67	0	34	1	1
chr3_47120774_47120774_Missense_Mutation	1	67	0	34	1	1
chr3_49368539_49368539_Missense_Mutation	1	67	0	34	1	1
chr3_53762064_53762064_Missense_Mutation	1	67	0	34	1	1
chr3_121493544_121493544_Missense_Mutation	1	67	0	34	1	1
chr3_138712225_138712225_Missense_Mutation	1	67	0	34	1	1
chr3_142558665_142558665_Missense_Mutation	1	67	0	34	1	1
chr3_155911233_155911233_Missense_Mutation	1	67	0	34	1	1
chr4_25670784_25670784_Missense_Mutation	1	67	0	34	1	1
chr4_25676176_25676176_Missense_Mutation	1	67	0	34	1	1
chr4_125320031_125320031_Missense_Mutation	1	67	0	34	1	1
chr5_32143786_32143786_Missense_Mutation	1	67	0	34	1	1
chr5_55952252_55952252_Missense_Mutation	1	67	0	34	1	1
chr5_56893549_56893549_Missense_Mutation	1	67	0	34	1	1
chr5_131986829_131986829_Missense_Mutation	1	67	0	34	1	1
chr5_160093995_160093995_Missense_Mutation	2	66	0	34	0.5511551	1
chr5_171391419_171391419_Missense_Mutation	1	67	0	34	1	1
chr5_177096288_177096288_Missense_Mutation	1	67	0	34	1	1
chr6_55760479_55760479_Missense_Mutation	1	67	0	34	1	1
chr7_20159604_20159604_Missense_Mutation	1	67	0	34	1	1
chr7_74063312_74063312_Missense_Mutation	1	67	0	34	1	1
chr7_91995631_91995631_Missense_Mutation	1	67	0	34	1	1
chr7_98910095_98910095_Missense_Mutation	1	67	0	34	1	1
chr7_98935637_98935637_Missense_Mutation	1	67	0	34	1	1
chr7_138869646_138869646_Missense_Mutation	1	67	0	34	1	1
chr7_148118276_148118276_Missense_Mutation	2	66	0	34	0.5511551	1
chr7_152150993_152150993_Missense_Mutation	1	67	0	34	1	1
chr7_157006547_157006547_Missense_Mutation	1	67	1	33	1	1
chr7_157006575_157006575_Missense_Mutation	1	67	0	34	1	1
chr8_41699484_41699484_Missense_Mutation	1	67	0	34	1	1
chr8_55969741_55969741_Missense_Mutation	1	67	0	34	1	1
chr8_56168266_56168266_Missense_Mutation	1	67	0	34	1	1
chr8_102314764_102314764_Missense_Mutation	1	67	0	34	1	1
chr8_112573596_112573596_Missense_Mutation	1	67	0	34	1	1
chr8_143924881_143924881_Missense_Mutation	1	67	0	34	1	1
chr8_143926801_143926801_Missense_Mutation	1	67	0	34	1	1
chr8_144511552_144511552_Missense_Mutation	1	67	0	34	1	1
chr9_36966551_36966551_Missense_Mutation	1	67	0	34	1	1
chr9_99833411_99833411_Missense_Mutation	1	67	0	34	1	1
chr9_115024040_115024040_Missense_Mutation	1	67	0	34	1	1
chr9_115036180_115036180_Missense_Mutation	1	67	0	34	1	1
chr9_134036230_134036230_Missense_Mutation	1	67	0	34	1	1
chr9_136496235_136496235_Missense_Mutation	1	67	0	34	1	1
chr9_136509775_136509775_Missense_Mutation	1	67	0	34	1	1
chr10_43109084_43109084_Missense_Mutation	1	67	0	34	1	1
chr10_74976078_74976078_Missense_Mutation	1	67	0	34	1	1
chr10_102400675_102400675_Missense_Mutation	1	67	0	34	1	1
chr11_1018023_1018023_Missense_Mutation	1	67	0	34	1	1
chr11_3712686_3712686_Nonsense_Mutation	1	67	0	34	1	1
chr11_61795625_61795625_Missense_Mutation	1	67	0	34	1	1
chr11_70206420_70206420_Missense_Mutation	1	67	0	34	1	1
chr11_92761939_92761939_Missense_Mutation	1	67	0	34	1	1
chr11_92761940_92761940_Missense_Mutation	1	67	0	34	1	1
chr11_96093403_96093403_Nonsense_Mutation	1	67	0	34	1	1
chr11_108253951_108253951_Missense_Mutation	1	67	0	34	1	1
chr11_108317373_108317373_Missense_Mutation	1	67	0	34	1	1
chr11_118504441_118504441_Nonsense_Mutation	1	67	0	34	1	1
chr12_50085448_50085448_Missense_Mutation	1	67	0	34	1	1
chr12_57099304_57099304_Missense_Mutation	1	67	0	34	1	1
chr12_122333089_122333089_Missense_Mutation	1	67	0	34	1	1
chr13_28028221_28028221_Missense_Mutation	1	67	0	34	1	1
chr13_32332695_32332695_Missense_Mutation	1	67	0	34	1	1
chr13_32332850_32332850_Missense_Mutation	1	67	0	34	1	1
chr13_32338297_32338297_Missense_Mutation	1	67	0	34	1	1
chr13_32363292_32363292_Missense_Mutation	1	67	0	34	1	1
chr13_40560196_40560196_Missense_Mutation	1	67	0	34	1	1
chr14_34785844_34785844_Missense_Mutation	1	67	0	34	1	1
chr14_50758500_50758500_Missense_Mutation	1	67	0	34	1	1
chr14_55650367_55650367_Missense_Mutation	1	67	0	34	1	1
chr14_60646381_60646381_Missense_Mutation	1	67	0	34	1	1
chr14_60646407_60646407_Nonsense_Mutation	1	67	0	34	1	1
chr14_61721551_61721551_Missense_Mutation	1	67	0	34	1	1
chr14_99174294_99174294_Missense_Mutation	1	67	0	34	1	1
chr15_40217533_40217533_Missense_Mutation	1	67	0	34	1	1
chr15_52407303_52407303_Missense_Mutation	1	67	0	34	1	1
chr15_90890099_90890099_Missense_Mutation	1	67	0	34	1	1
chr16_3850334_3850334_Missense_Mutation	1	67	0	34	1	1
chr16_10180170_10180170_Missense_Mutation	1	67	0	34	1	1
chr16_15750206_15750206_Missense_Mutation	1	67	0	34	1	1
chr16_31189725_31189725_Missense_Mutation	1	67	0	34	1	1
chr16_72958225_72958225_Nonsense_Mutation	1	67	0	34	1	1
chr17_7674242_7674242_Frame_Shift_Del	1	67	0	34	1	1
chr17_38724653_38724653_Missense_Mutation	1	67	0	34	1	1
chr17_39717387_39717387_Missense_Mutation	1	67	0	34	1	1
chr18_58734357_58734357_Missense_Mutation	1	67	0	34	1	1
chr19_6852968_6852968_Missense_Mutation	1	67	0	34	1	1
chr19_8953997_8953997_Missense_Mutation	1	67	0	34	1	1
chr19_14516531_14516531_Missense_Mutation	1	67	0	34	1	1
chr19_42289016_42289016_Missense_Mutation	1	67	0	34	1	1
chr19_46920281_46920281_Missense_Mutation	1	67	0	34	1	1
chr20_41097234_41097234_Missense_Mutation	1	67	0	34	1	1
chr20_42677956_42677956_Missense_Mutation	1	67	0	34	1	1
chr20_51790755_51790755_Missense_Mutation	1	67	0	34	1	1
chr22_20110042_20110042_Missense_Mutation	1	67	0	34	1	1
chr22_29668384_29668384_Missense_Mutation	1	67	0	34	1	1
chr22_36301006_36301006_Missense_Mutation	1	67	0	34	1	1
chr22_40424348_40424348_Missense_Mutation	1	67	0	34	1	1
chrX_41198593_41198593_Missense_Mutation	1	67	0	34	1	1
chrX_49031429_49031429_Missense_Mutation	1	67	0	34	1	1
chrX_49043118_49043118_Missense_Mutation	1	67	0	34	1	1
chrX_64191217_64191217_Missense_Mutation	1	67	0	34	1	1
chrX_71128043_71128043_Missense_Mutation	1	67	0	34	1	1
chrX_71290712_71290712_Missense_Mutation	1	67	0	34	1	1
chrX_124090574_124090574_Splice_Site	1	67	0	34	1	1
chrX_126165171_126165171_Missense_Mutation	1	67	0	34	1	1
chrX_130067167_130067167_Missense_Mutation	1	67	0	34	1	1
chrX_153541711_153541711_Missense_Mutation	1	67	0	34	1	1
chrX_153548840_153548840_Missense_Mutation	1	67	0	34	1	1
chr2_127294068_127294068_Missense_Mutation	1	67	0	34	1	1
chr3_53497338_53497338_Missense_Mutation	1	67	0	34	1	1
chr14_95124370_95124370_Missense_Mutation	1	67	0	34	1	1
chr17_7674217_7674217_Missense_Mutation	1	67	0	34	1	1
chr17_80347198_80347198_Missense_Mutation	1	67	0	34	1	1
chr17_80347419_80347419_Missense_Mutation	1	67	0	34	1	1
chr17_80347629_80347629_Missense_Mutation	1	67	0	34	1	1
chr3_59922411_59922411_Missense_Mutation	1	67	0	34	1	1
chr3_128650733_128650733_Missense_Mutation	1	67	0	34	1	1
chr3_195789181_195789181_Missense_Mutation	1	67	0	34	1	1
chr5_24537523_24537523_Missense_Mutation	1	67	0	34	1	1
chr8_100715522_100715522_Missense_Mutation	1	67	0	34	1	1
chr9_115059988_115059988_Missense_Mutation	1	67	0	34	1	1
chr10_8073965_8073966_Frame_Shift_Ins	1	67	0	34	1	1
chr22_29661223_29661223_Missense_Mutation	1	67	0	34	1	1
chr22_41172573_41172573_Missense_Mutation	1	67	0	34	1	1
chrX_153562169_153562169_Missense_Mutation	1	67	0	34	1	1
chr1_3412232_3412232_Missense_Mutation	1	67	0	34	1	1
chr1_26780004_26780004_Missense_Mutation	1	67	0	34	1	1
chr2_32464591_32464591_Missense_Mutation	1	67	0	34	1	1
chr2_70088350_70088350_Missense_Mutation	1	67	0	34	1	1
chr2_108764671_108764671_Missense_Mutation	1	67	0	34	1	1
chr2_147917397_147917397_Missense_Mutation	1	67	0	34	1	1
chr3_10141971_10141971_Missense_Mutation	1	67	0	34	1	1
chr3_47113991_47113991_Missense_Mutation	1	67	0	34	1	1
chr3_49375472_49375472_Missense_Mutation	1	67	0	34	1	1
chr3_100736698_100736698_Missense_Mutation	1	67	0	34	1	1
chr3_142556117_142556117_Missense_Mutation	1	67	0	34	1	1
chr3_179199158_179199158_Missense_Mutation	1	67	0	34	1	1
chr3_186048656_186048656_Nonsense_Mutation	1	67	0	34	1	1
chr3_189872897_189872897_Missense_Mutation	1	67	0	34	1	1
chr3_196055145_196055145_Missense_Mutation	1	67	0	34	1	1
chr4_125448655_125448655_Missense_Mutation	1	67	0	34	1	1
chr5_69381994_69381994_Missense_Mutation	1	67	0	34	1	1
chr5_180614071_180614071_Missense_Mutation	1	67	0	34	1	1
chr6_41940500_41940500_Missense_Mutation	1	67	0	34	1	1
chr6_93419316_93419316_Missense_Mutation	1	67	0	34	1	1
chr6_127982842_127982842_Missense_Mutation	1	67	0	34	1	1
chr6_167914711_167914711_Missense_Mutation	1	67	0	34	1	1
chr7_98897855_98897855_Missense_Mutation	1	67	0	34	1	1
chr8_31124914_31124914_Missense_Mutation	1	67	0	34	1	1
chr8_41684665_41684665_Missense_Mutation	1	67	0	34	1	1
chr8_138152476_138152476_Missense_Mutation	1	67	0	34	1	1
chr8_143921986_143921986_Nonsense_Mutation	1	67	0	34	1	1
chr9_93261907_93261907_Missense_Mutation	1	67	0	34	1	1
chr9_99863637_99863637_Missense_Mutation	1	67	0	34	1	1
chr11_69643052_69643052_Missense_Mutation	1	67	0	34	1	1
chr12_6583266_6583266_Missense_Mutation	1	67	0	34	1	1
chr12_49038170_49038170_Missense_Mutation	1	67	0	34	1	1
chr12_49643371_49643371_Missense_Mutation	1	67	0	34	1	1
chr12_56721083_56721083_Missense_Mutation	1	67	0	34	1	1
chr12_70637386_70637386_Missense_Mutation	1	67	0	34	1	1
chr15_92943039_92943039_Missense_Mutation	1	67	0	34	1	1
chr16_68808628_68808695_Splice_Site	1	67	0	34	1	1
chr17_16032379_16032379_Missense_Mutation	1	67	0	34	1	1
chr17_80313165_80313165_Missense_Mutation	1	67	0	34	1	1
chr18_53530570_53530570_Missense_Mutation	1	67	0	34	1	1
chr19_8947149_8947149_Nonsense_Mutation	1	67	0	34	1	1
chr19_8973641_8973641_Missense_Mutation	1	67	0	34	1	1
chr19_12940114_12940114_Missense_Mutation	1	67	0	34	1	1
chr19_12940601_12940601_Nonsense_Mutation	1	67	0	34	1	1
chr19_12940618_12940618_Missense_Mutation	1	67	0	34	1	1
chr19_14516014_14516014_Missense_Mutation	1	67	0	34	1	1
chr19_32881959_32881959_Missense_Mutation	1	67	0	34	1	1
chrX_41225070_41225070_Missense_Mutation	1	67	0	34	1	1
chrX_71126152_71126152_Missense_Mutation	1	67	0	34	1	1
chrX_71126373_71126373_Missense_Mutation	1	67	0	34	1	1
chrX_77676283_77676283_Missense_Mutation	1	67	0	34	1	1
chr1_7751296_7751296_Missense_Mutation	1	67	0	34	1	1
chr1_11109328_11109328_Missense_Mutation	1	67	0	34	1	1
chr1_15495453_15495453_Splice_Site	1	67	0	34	1	1
chr1_15935096_15935096_Missense_Mutation	1	67	0	34	1	1
chr1_15935745_15935745_Missense_Mutation	1	67	0	34	1	1
chr1_36466808_36466808_Missense_Mutation	1	67	0	34	1	1
chr1_179107851_179107851_Missense_Mutation	1	67	0	34	1	1
chr1_197100667_197100667_Missense_Mutation	1	67	0	34	1	1
chr1_198742332_198742332_Missense_Mutation	1	67	0	34	1	1
chr2_25742876_25742876_Missense_Mutation	1	67	0	34	1	1
chr2_74361534_74361534_Missense_Mutation	1	67	0	34	1	1
chr2_99672549_99672549_Nonsense_Mutation	1	67	0	34	1	1
chr2_188988633_188988633_Missense_Mutation	1	67	0	34	1	1
chr2_189818031_189818031_Missense_Mutation	1	67	0	34	1	1
chr2_197401426_197401426_Missense_Mutation	1	67	0	34	1	1
chr2_203729728_203729728_Missense_Mutation	1	67	0	34	1	1
chr2_211725080_211725080_Missense_Mutation	1	67	0	34	1	1
chr2_215349641_215349641_Missense_Mutation	1	67	0	34	1	1
chr2_218984255_218984255_Missense_Mutation	1	67	0	34	1	1
chr3_10032918_10032918_Missense_Mutation	1	67	0	34	1	1
chr3_47120376_47120376_Missense_Mutation	1	67	0	34	1	1
chr3_196053522_196053522_Missense_Mutation	1	67	0	34	1	1
chr3_196053535_196053535_Missense_Mutation	1	67	0	34	1	1
chr4_1955990_1955990_Missense_Mutation	1	67	0	34	1	1
chr4_54695710_54695710_Missense_Mutation	1	67	0	34	1	1
chr4_105235954_105235954_Missense_Mutation	1	67	0	34	1	1
chr4_125481521_125481521_Missense_Mutation	1	67	0	34	1	1
chr4_152322961_152322961_Missense_Mutation	1	67	0	34	1	1
chr4_152323129_152323129_Missense_Mutation	1	67	0	34	1	1
chr5_68296287_68296287_Missense_Mutation	1	67	0	34	1	1
chr5_131988879_131988879_Missense_Mutation	1	67	0	34	1	1
chr5_138917853_138917853_Missense_Mutation	1	67	0	34	1	1
chr6_55794393_55794393_Missense_Mutation	1	67	0	34	1	1
chr6_93356915_93356915_Missense_Mutation	1	67	0	34	1	1
chr6_117386936_117386936_Missense_Mutation	1	67	0	34	1	1
chr6_117602052_117602052_Missense_Mutation	1	67	0	34	1	1
chr6_157206866_157206866_Missense_Mutation	1	67	0	34	1	1
chr6_167943133_167943133_Missense_Mutation	1	67	0	34	1	1
chr7_86786784_86786784_Missense_Mutation	1	67	0	34	1	1
chr7_138919175_138919175_Missense_Mutation	1	67	0	34	1	1
chr7_148816736_148816736_Missense_Mutation	1	67	0	34	1	1
chr7_148826530_148826530_Missense_Mutation	1	67	0	34	1	1
chr8_68099698_68099698_Missense_Mutation	1	67	0	34	1	1
chr8_70131900_70131900_Missense_Mutation	1	67	0	34	1	1
chr8_89955495_89955495_Missense_Mutation	1	67	0	34	1	1
chr8_102254484_102254484_Missense_Mutation	1	67	0	34	1	1
chr8_102286396_102286396_Missense_Mutation	1	67	0	34	1	1
chr8_102298958_102298958_Missense_Mutation	1	67	0	34	1	1
chr8_112311166_112311166_Missense_Mutation	1	67	0	34	1	1
chr8_138367977_138367977_Missense_Mutation	1	67	0	34	1	1
chr8_143918857_143918857_Missense_Mutation	1	67	0	34	1	1
chr9_85020338_85020338_Missense_Mutation	1	67	0	34	1	1
chr9_95125088_95125088_Missense_Mutation	1	67	0	34	1	1
chr9_121173388_121173388_Missense_Mutation	1	67	0	34	1	1
chr9_130884467_130884467_Missense_Mutation	1	67	0	34	1	1
chr9_132900838_132900838_Splice_Site	1	67	0	34	1	1
chr10_21612436_21612436_Missense_Mutation	1	67	0	34	1	1
chr10_43102497_43102497_Missense_Mutation	1	67	0	34	1	1
chr10_43128237_43128237_Missense_Mutation	1	67	0	34	1	1
chr11_32400024_32400024_Missense_Mutation	1	67	0	34	1	1
chr11_85981148_85981148_Missense_Mutation	1	67	0	34	1	1
chr11_92840594_92840594_Missense_Mutation	1	67	0	34	1	1
chr11_118503111_118503111_Missense_Mutation	1	67	0	34	1	1
chr11_120481322_120481322_Missense_Mutation	1	67	0	34	1	1
chr12_49030676_49030676_Missense_Mutation	1	67	0	34	1	1
chr12_49634342_49634342_Missense_Mutation	1	67	0	34	1	1
chr12_56720848_56720848_Missense_Mutation	1	67	0	34	1	1
chr12_58890703_58890703_Missense_Mutation	1	67	0	34	1	1
chr12_70555165_70555165_Missense_Mutation	1	67	0	34	1	1
chr12_124486494_124486494_Missense_Mutation	1	67	0	34	1	1
chr13_102875836_102875836_Missense_Mutation	1	67	0	34	1	1
chr14_29624179_29624179_Missense_Mutation	1	67	0	34	1	1
chr14_34800331_34800331_Nonsense_Mutation	1	67	0	34	1	1
chr14_50752678_50752678_Missense_Mutation	1	67	0	34	1	1
chr14_92004929_92004929_Missense_Mutation	1	67	0	34	1	1
chr15_87940676_87940676_Missense_Mutation	1	67	0	34	1	1
chr16_291221_291221_Missense_Mutation	1	67	0	34	1	1
chr16_13937839_13937839_Missense_Mutation	1	67	0	34	1	1
chr16_31184278_31184278_Missense_Mutation	1	67	0	34	1	1
chr16_89739152_89739152_Missense_Mutation	1	67	0	34	1	1
chr17_5377194_5377194_Missense_Mutation	1	67	0	34	1	1
chr17_7674221_7674221_Missense_Mutation	2	66	0	34	0.5511551	1
chr17_31225215_31225215_Missense_Mutation	1	67	0	34	1	1
chr17_39471300_39471300_Missense_Mutation	1	67	0	34	1	1
chr17_39492873_39492873_Missense_Mutation	1	67	0	34	1	1
chr17_39494587_39494587_Missense_Mutation	1	67	0	34	1	1
chr17_39509742_39509742_Missense_Mutation	1	67	0	34	1	1
chr17_39530772_39530772_Missense_Mutation	1	67	0	34	1	1
chr17_39709359_39709359_Missense_Mutation	1	67	0	34	1	1
chr17_39712031_39712031_Missense_Mutation	1	67	0	34	1	1
chr17_39716516_39716516_Missense_Mutation	1	67	0	34	1	1
chr17_50190035_50190035_Missense_Mutation	1	67	0	34	1	1
chr17_59661613_59661613_Missense_Mutation	1	67	0	34	1	1
chr17_59666878_59666878_Missense_Mutation	1	67	0	34	1	1
chr17_64503981_64503984_Splice_Site	2	66	0	34	0.5511551	1
chr19_8951094_8951094_Missense_Mutation	1	67	0	34	1	1
chr19_8965633_8965633_Missense_Mutation	1	67	0	34	1	1
chr19_14093206_14093206_Missense_Mutation	1	67	0	34	1	1
chr19_29823740_29823740_Missense_Mutation	1	67	0	34	1	1
chr20_32366441_32366441_Nonsense_Mutation	1	67	0	34	1	1
chr20_41172537_41172537_Missense_Mutation	1	67	0	34	1	1
chr22_27799375_27799375_Missense_Mutation	1	67	0	34	1	1
chrX_47567390_47567390_Missense_Mutation	1	67	0	34	1	1
chrX_71125030_71125030_Missense_Mutation	1	67	0	34	1	1
chrX_77589882_77589882_Missense_Mutation	1	67	0	34	1	1
chrX_130074073_130074073_Missense_Mutation	1	67	0	34	1	1
chrX_133953181_133953181_Missense_Mutation	1	67	0	34	1	1
chr2_47905718_47905718_Translation_Start_Site	1	67	0	34	1	1
chr2_189877347_189877347_Missense_Mutation	1	67	0	34	1	1
chr3_195788677_195788677_Missense_Mutation	1	67	0	34	1	1
chr5_112827143_112827143_Missense_Mutation	1	67	0	34	1	1
chr8_70132000_70132000_Missense_Mutation	1	67	0	34	1	1
chr11_128810988_128810988_Nonstop_Mutation	1	67	0	34	1	1
chr12_6667824_6667824_Missense_Mutation	1	67	0	34	1	1
chr12_47999918_47999918_Splice_Site	1	67	0	34	1	1
chr14_36517826_36517826_Missense_Mutation	1	67	0	34	1	1
chr17_20205216_20205216_Missense_Mutation	1	67	0	34	1	1
chrX_71137735_71137735_Missense_Mutation	1	67	0	34	1	1
chrX_108735742_108735742_Missense_Mutation	1	67	0	34	1	1
chr4_105235018_105235018_Missense_Mutation	1	67	0	34	1	1
chr5_158713092_158713092_Missense_Mutation	1	67	0	34	1	1
chr12_49635910_49635910_Missense_Mutation	1	67	0	34	1	1
chr19_46921987_46921987_Missense_Mutation	1	67	0	34	1	1
chr1_85270705_85270705_Missense_Mutation	1	67	0	34	1	1
chr12_49051296_49051297_Frame_Shift_Del	1	67	0	34	1	1
chr12_114676448_114676448_Frame_Shift_Del	1	67	0	34	1	1
chr15_67066295_67066295_Missense_Mutation	1	67	0	34	1	1
chr16_15737564_15737564_Missense_Mutation	1	67	0	34	1	1
chr16_68823584_68823584_Frame_Shift_Del	1	67	0	34	1	1
chr16_74624021_74624021_Missense_Mutation	1	67	0	34	1	1
chr18_44950222_44950222_Missense_Mutation	1	67	0	34	1	1
chr1_197121980_197121980_Missense_Mutation	1	67	0	34	1	1
chr2_203726852_203726852_Missense_Mutation	1	67	0	34	1	1
chr3_128625964_128625964_Missense_Mutation	1	67	0	34	1	1
chr4_125481670_125481670_Frame_Shift_Del	1	67	0	34	1	1
chr6_117321390_117321390_Missense_Mutation	1	67	0	34	1	1
chr7_102170491_102170491_Missense_Mutation	1	67	0	34	1	1
chr7_138837997_138837997_Missense_Mutation	1	67	0	34	1	1
chr8_43010398_43010398_Missense_Mutation	1	67	0	34	1	1
chr9_93297906_93297906_Missense_Mutation	1	67	0	34	1	1
chr9_133105992_133105992_Missense_Mutation	1	67	0	34	1	1
chr10_31521236_31521236_Missense_Mutation	1	67	0	34	1	1
chr13_32363214_32363214_Missense_Mutation	1	67	0	34	1	1
chr14_50757381_50757381_Missense_Mutation	1	67	0	34	1	1
chr15_40213423_40213423_Missense_Mutation	1	67	0	34	1	1
chr17_7674920_7674920_Frame_Shift_Del	1	67	0	34	1	1
chr17_76736442_76736462_In_Frame_Del	1	67	0	34	1	1
chr17_80288121_80288121_Missense_Mutation	1	67	0	34	1	1
chr18_44951421_44951421_Missense_Mutation	1	67	0	34	1	1
chr19_8958807_8958807_Missense_Mutation	1	67	0	34	1	1
chr19_40265226_40265226_Missense_Mutation	1	67	0	34	1	1
chr22_23181057_23181057_Missense_Mutation	1	67	0	34	1	1
chrX_71297876_71297876_Missense_Mutation	1	67	0	34	1	1
chrX_154354854_154354854_Missense_Mutation	1	67	0	34	1	1
chr1_15495356_15495356_Missense_Mutation	1	67	0	34	1	1
chr2_188996161_188996161_Missense_Mutation	1	67	0	34	1	1
chr7_152177946_152177946_Nonsense_Mutation	1	67	0	34	1	1
chr10_87933162_87933163_Frame_Shift_Del	1	67	0	34	1	1
chr12_57516882_57516882_Missense_Mutation	1	67	0	34	1	1
chr14_20313549_20313549_Nonsense_Mutation	1	67	0	34	1	1
chr14_95103453_95103453_Missense_Mutation	1	67	0	34	1	1
chr16_23630352_23630364_Frame_Shift_Del	1	67	0	34	1	1
chr17_7673796_7673796_Missense_Mutation	1	67	0	34	1	1
chr17_43093901_43093901_Nonsense_Mutation	1	67	0	34	1	1
chr18_53435187_53435187_Missense_Mutation	1	67	0	34	1	1
chr2_79874260_79874260_Missense_Mutation	1	67	0	34	1	1
chr2_80608230_80608230_Missense_Mutation	1	67	0	34	1	1
chr3_38138818_38138818_Missense_Mutation	1	67	0	34	1	1
chr5_138930563_138930563_Missense_Mutation	1	67	0	34	1	1
chr9_99833293_99833293_Missense_Mutation	1	67	0	34	1	1
chr17_7675182_7675182_Nonsense_Mutation	1	67	0	34	1	1
chrX_47566991_47566991_Missense_Mutation	1	67	0	34	1	1
chr1_193135445_193135445_Missense_Mutation	1	67	0	34	1	1
chr1_198750614_198750614_Missense_Mutation	1	67	0	34	1	1
chr2_186656357_186656358_Frame_Shift_Ins	1	67	0	34	1	1
chr2_189004042_189004042_Missense_Mutation	1	67	0	34	1	1
chr3_53722450_53722450_Missense_Mutation	1	67	0	34	1	1
chr3_136443401_136443401_Missense_Mutation	1	67	0	34	1	1
chr3_142493182_142493182_Missense_Mutation	1	67	0	34	1	1
chr4_186619501_186619501_Missense_Mutation	1	67	0	34	1	1
chr5_24498506_24498506_Missense_Mutation	1	67	0	34	1	1
chr7_146774337_146774337_Missense_Mutation	1	67	0	34	1	1
chr9_131197620_131197621_Frame_Shift_Ins	1	67	0	34	1	1
chr12_121810470_121810470_Nonsense_Mutation	1	67	0	34	1	1
chr13_32336562_32336562_Missense_Mutation	1	67	0	34	1	1
chr16_68819291_68819291_Frame_Shift_Del	1	67	0	34	1	1
chr17_20205770_20205770_Missense_Mutation	1	67	0	34	1	1
chr19_680435_680435_Missense_Mutation	1	67	0	34	1	1
chr19_6270627_6270627_Missense_Mutation	1	67	0	34	1	1
chr5_68295294_68295302_In_Frame_Del	1	67	0	34	1	1
chr8_41699515_41699515_Missense_Mutation	1	67	0	34	1	1
chr10_87894110_87894110_Splice_Site	1	67	0	34	1	1
chr10_87933165_87933165_Missense_Mutation	1	67	0	34	1	1
chr13_48380217_48380217_Missense_Mutation	1	67	0	34	1	1
chr14_36517993_36517993_Missense_Mutation	1	67	0	34	1	1
chr17_7674263_7674263_Missense_Mutation	1	67	0	34	1	1
chr2_108772500_108772500_Missense_Mutation	1	67	0	34	1	1
chr3_185451288_185451288_Missense_Mutation	1	67	0	34	1	1
chr4_108070768_108070768_Nonsense_Mutation	1	67	0	34	1	1
chr4_152329721_152329721_Missense_Mutation	1	67	0	34	1	1
chr7_138583956_138583956_Missense_Mutation	1	67	0	34	1	1
chr10_43112101_43112101_Missense_Mutation	1	67	0	34	1	1
chr12_56101949_56101949_Missense_Mutation	1	67	0	34	1	1
chr17_7675223_7675223_Missense_Mutation	1	67	0	34	1	1
chr19_8936879_8936879_Missense_Mutation	1	67	0	34	1	1
chr22_29674879_29674879_Missense_Mutation	1	67	0	34	1	1
chr3_179218294_179218294_Missense_Mutation	4	64	1	33	0.6624503	1
chr10_8073989_8073990_Frame_Shift_Ins	1	67	0	34	1	1
chr11_64805056_64805056_Missense_Mutation	1	67	0	34	1	1
chr12_57469651_57469651_Missense_Mutation	1	67	0	34	1	1
chr1_179108182_179108182_Missense_Mutation	1	67	0	34	1	1
chr3_128632032_128632033_Frame_Shift_Del	1	67	0	34	1	1
chr6_33319674_33319674_Missense_Mutation	1	67	0	34	1	1
chr15_74044771_74044771_Missense_Mutation	1	67	0	34	1	1
chr15_90749930_90749930_Missense_Mutation	1	67	0	34	1	1
chr17_7674947_7674947_Missense_Mutation	1	67	1	33	1	1
chr17_80332415_80332415_Missense_Mutation	1	67	0	34	1	1
chr19_8958229_8958229_Missense_Mutation	1	67	0	34	1	1
chr20_32432945_32432945_Missense_Mutation	1	67	0	34	1	1
chr1_45331253_45331253_Missense_Mutation	1	67	0	34	1	1
chr1_186341057_186341057_Missense_Mutation	1	67	0	34	1	1
chr7_138567640_138567640_Missense_Mutation	1	67	0	34	1	1
chr8_68055850_68055850_Missense_Mutation	1	67	0	34	1	1
chr11_92800184_92800184_Missense_Mutation	1	67	0	34	1	1
chr16_9768903_9768903_Missense_Mutation	1	67	0	34	1	1
chr16_23630082_23630082_Missense_Mutation	1	67	0	34	1	1
chr17_80351740_80351740_Missense_Mutation	1	67	0	34	1	1
chr1_13782474_13782474_Missense_Mutation	1	67	0	34	1	1
chr1_150817408_150817408_Missense_Mutation	1	67	0	34	1	1
chr1_186352110_186352110_Missense_Mutation	1	67	0	34	1	1
chr1_197101312_197101312_Missense_Mutation	1	67	0	34	1	1
chr2_42288248_42288248_Missense_Mutation	1	67	0	34	1	1
chr2_140371210_140371210_Missense_Mutation	1	67	0	34	1	1
chr2_214767531_214767532_Missense_Mutation	1	67	0	34	1	1
chr4_125318831_125318831_Missense_Mutation	1	67	0	34	1	1
chr5_177210470_177210470_Missense_Mutation	1	67	0	34	1	1
chr5_177210575_177210575_Missense_Mutation	1	67	0	34	1	1
chr7_5357084_5357084_Missense_Mutation	1	67	1	33	1	1
chr7_5986976_5986976_Missense_Mutation	1	67	0	34	1	1
chr7_20161772_20161772_Missense_Mutation	1	67	0	34	1	1
chr8_144512433_144512433_Missense_Mutation	1	67	0	34	1	1
chr8_144516318_144516318_Missense_Mutation	1	67	0	34	1	1
chr9_115021162_115021162_Missense_Mutation	1	67	0	34	1	1
chr9_121088492_121088492_Missense_Mutation	1	67	0	34	1	1
chr13_91693325_91693325_Missense_Mutation	1	67	0	34	1	1
chr15_40624039_40624039_Missense_Mutation	1	67	0	34	1	1
chr17_65558473_65558473_Missense_Mutation	1	67	0	34	1	1
chr19_8917697_8917697_Missense_Mutation	1	67	0	34	1	1
chr19_8936591_8936591_Missense_Mutation	1	67	0	34	1	1
chr19_8937494_8937494_Missense_Mutation	1	67	0	34	1	1
chr19_8937666_8937666_Missense_Mutation	1	67	0	34	1	1
chr19_8938473_8938473_Missense_Mutation	1	67	0	34	1	1
chr19_8946306_8946306_Missense_Mutation	1	67	0	34	1	1
chr19_8947074_8947074_Missense_Mutation	1	67	0	34	1	1
chr19_8947220_8947220_Missense_Mutation	1	67	0	34	1	1
chr19_8948556_8948556_Missense_Mutation	1	67	0	34	1	1
chr19_8954956_8954956_Missense_Mutation	1	67	0	34	1	1
chr19_8955583_8955583_Missense_Mutation	1	67	1	33	1	1
chr19_8964670_8964670_Missense_Mutation	1	67	0	34	1	1
chr19_8966253_8966253_Missense_Mutation	1	67	0	34	1	1
chr19_8966274_8966274_Missense_Mutation	1	67	0	34	1	1
chr19_8967127_8967127_Missense_Mutation	1	67	0	34	1	1
chr5_112840105_112840105_Missense_Mutation	1	67	0	34	1	1
chr6_156779211_156779211_Missense_Mutation	1	67	0	34	1	1
chr7_147639207_147639207_Missense_Mutation	1	67	0	34	1	1
chr10_92111164_92111164_Missense_Mutation	1	67	0	34	1	1
chr11_118478065_118478065_Missense_Mutation	1	67	0	34	1	1
chr16_67066799_67066799_Splice_Site	1	67	0	34	1	1
chr11_57815919_57815919_Missense_Mutation	1	67	0	34	1	1
chr12_132672274_132672274_Missense_Mutation	1	67	0	34	1	1
chr16_72811743_72811743_Missense_Mutation	1	67	0	34	1	1
chr19_46919225_46919229_Frame_Shift_Del	1	67	0	34	1	1
chr2_74378004_74378004_Missense_Mutation	1	67	0	34	1	1
chr3_142498673_142498673_Missense_Mutation	1	67	0	34	1	1
chr6_29942626_29942626_Missense_Mutation	1	67	0	34	1	1
chr6_93356958_93356958_Missense_Mutation	1	67	0	34	1	1
chr7_152148345_152148345_Nonsense_Mutation	1	67	0	34	1	1
chr17_7673764_7673764_Frame_Shift_Del	1	67	0	34	1	1
chrX_53382359_53382359_Missense_Mutation	1	67	0	34	1	1
chr12_114683075_114683075_Frame_Shift_Del	1	67	0	34	1	1
chr14_66922724_66922724_Missense_Mutation	1	67	0	34	1	1
chr17_63929437_63929438_Nonsense_Mutation	1	67	0	34	1	1
chr3_179199088_179199088_Missense_Mutation	1	67	0	34	1	1
chr3_179218303_179218303_Missense_Mutation	3	65	0	34	0.5489109	1
chr19_15256152_15256152_Missense_Mutation	1	67	0	34	1	1
chr3_142562437_142562437_Missense_Mutation	1	67	0	34	1	1
chr5_56865441_56865441_Frame_Shift_Del	1	67	0	34	1	1
chr16_2086301_2086301_Missense_Mutation	1	67	0	34	1	1
chr5_56859894_56859895_Frame_Shift_Del	1	67	0	34	1	1
chr5_56888263_56888263_Missense_Mutation	1	67	0	34	1	1
chr16_12524756_12524756_Missense_Mutation	1	67	0	34	1	1
chr20_42771514_42771514_Missense_Mutation	1	67	0	34	1	1
chr5_56865444_56865444_Frame_Shift_Del	1	67	0	34	1	1
chr7_152152748_152152749_Nonsense_Mutation	1	67	0	34	1	1
chr11_92809917_92809917_Missense_Mutation	1	67	0	34	1	1
chr16_67066748_67066748_Nonsense_Mutation	1	67	0	34	1	1
chr16_3731383_3731383_Missense_Mutation	1	67	0	34	1	1
chr16_67066681_67066681_Splice_Site	1	67	0	34	1	1
chr3_52668569_52668569_Nonsense_Mutation	1	67	0	34	1	1
chr17_7674207_7674207_Frame_Shift_Del	1	67	0	34	1	1
chr1_11237926_11237926_Missense_Mutation	1	67	0	34	1	1
chr2_29383780_29383780_Missense_Mutation	1	67	0	34	1	1
chr3_53497283_53497283_Missense_Mutation	1	67	0	34	1	1
chr9_136503221_136503250_In_Frame_Del	1	67	0	34	1	1
chr10_32037568_32037568_Missense_Mutation	1	67	0	34	1	1
chr15_90885155_90885155_Missense_Mutation	1	67	0	34	1	1
chr16_27449097_27449115_Frame_Shift_Del	1	67	0	34	1	1
chr17_7675992_7675992_Splice_Site	1	67	0	34	1	1
chr18_51048821_51048821_Frame_Shift_Del	1	67	0	34	1	1
chr18_52923833_52923833_Missense_Mutation	1	67	0	34	1	1
chr3_142556511_142556511_Missense_Mutation	1	67	0	34	1	1
chr7_81720829_81720829_Missense_Mutation	1	67	0	34	1	1
chr16_68738320_68738321_Frame_Shift_Ins	1	67	0	34	1	1
chr4_55087717_55087717_Missense_Mutation	1	67	0	34	1	1
chr6_93246907_93246907_Missense_Mutation	1	67	0	34	1	1
chr7_81745004_81745004_Missense_Mutation	1	67	0	34	1	1
chr7_86839349_86839349_Missense_Mutation	1	67	0	34	1	1
chr8_41694077_41694077_Missense_Mutation	1	67	0	34	1	1
chr10_75029466_75029486_In_Frame_Del	1	67	0	34	1	1
chr11_92889187_92889187_Splice_Site	1	67	0	34	1	1
chr12_1490172_1490172_Missense_Mutation	1	67	0	34	1	1
chr17_7675052_7675052_Splice_Site	1	67	0	34	1	1
chr17_12095671_12095671_Missense_Mutation	1	67	0	34	1	1
chr22_36316534_36316534_Missense_Mutation	1	67	0	34	1	1
chr1_26731371_26731371_Nonsense_Mutation	1	67	0	34	1	1
chr5_56882258_56882258_Nonsense_Mutation	1	67	0	34	1	1
chr5_56893567_56893568_Frame_Shift_Ins	1	67	0	34	1	1
chr7_92671454_92671454_Missense_Mutation	1	67	0	34	1	1
chr7_152181700_152181700_Nonsense_Mutation	1	67	0	34	1	1
chr8_143932225_143932225_Missense_Mutation	1	67	0	34	1	1
chr11_33864653_33864653_Missense_Mutation	1	67	0	34	1	1
chr12_27679612_27679612_Missense_Mutation	1	67	0	34	1	1
chr22_40424297_40424297_Missense_Mutation	1	67	0	34	1	1
chr2_61478923_61478923_Missense_Mutation	1	67	0	34	1	1
chr8_102285563_102285563_Missense_Mutation	1	67	0	34	1	1
chr3_12405920_12405920_Missense_Mutation	1	67	0	34	1	1
chr5_180631742_180631742_Missense_Mutation	1	67	0	34	1	1
chr10_8069533_8069549_Frame_Shift_Del	1	67	0	34	1	1
chr15_88126288_88126288_Missense_Mutation	1	67	0	34	1	1
chr3_142562330_142562330_Missense_Mutation	1	67	0	34	1	1
chr7_102028117_102028117_Missense_Mutation	1	67	0	34	1	1
chr12_121810163_121810170_Frame_Shift_Del	1	67	0	34	1	1
chr17_7674220_7674220_Missense_Mutation	1	67	0	34	1	1
chr7_116795951_116795951_Missense_Mutation	1	67	0	34	1	1
chr19_4090641_4090641_Missense_Mutation	1	67	0	34	1	1
chr1_64873398_64873398_Missense_Mutation	1	67	0	34	1	1
chr1_119915524_119915524_Nonsense_Mutation	1	67	0	34	1	1
chr1_157589339_157589339_Missense_Mutation	1	67	0	34	1	1
chr2_45008747_45008747_Missense_Mutation	1	67	0	34	1	1
chr3_186064440_186064440_Missense_Mutation	1	67	0	34	1	1
chr6_55774241_55774241_Missense_Mutation	1	67	0	34	1	1
chr7_138905048_138905056_In_Frame_Del	1	67	0	34	1	1
chr7_148832741_148832741_Missense_Mutation	1	67	0	34	1	1
chr8_91986958_91986958_Missense_Mutation	1	67	0	34	1	1
chr14_60649146_60649146_Missense_Mutation	1	67	0	34	1	1
chr17_7676192_7676208_Frame_Shift_Del	1	67	0	34	1	1
chr19_15255393_15255393_Missense_Mutation	1	67	0	34	1	1
chr1_15929232_15929233_Frame_Shift_Ins	1	67	0	34	1	1
chr3_142566143_142566143_Missense_Mutation	1	67	0	34	1	1
chr5_31495357_31495357_Missense_Mutation	1	67	0	34	1	1
chr7_98949528_98949528_Missense_Mutation	1	67	0	34	1	1
chr12_6954898_6954898_Missense_Mutation	1	67	0	34	1	1
chr15_90602329_90602329_Missense_Mutation	1	67	0	34	1	1
chr16_13947710_13947742_In_Frame_Del	1	67	0	34	1	1
chr17_7675217_7675217_Missense_Mutation	1	67	0	34	1	1
chr20_62174633_62174633_Missense_Mutation	1	67	0	34	1	1
chrX_71244829_71244852_In_Frame_Del	1	67	0	34	1	1
chr7_27165179_27165179_Missense_Mutation	1	67	0	34	1	1
chr14_102084678_102084681_Splice_Site	1	67	0	34	1	1
chr14_102084683_102084703_Nonsense_Mutation	1	67	0	34	1	1
chr17_43094054_43094054_Frame_Shift_Del	1	67	0	34	1	1
chr19_8973890_8973890_Missense_Mutation	1	67	0	34	1	1
chr20_62164213_62164213_Missense_Mutation	1	67	0	34	1	1
chrX_41140772_41140772_Splice_Site	1	67	0	34	1	1
chr2_24693282_24693282_Missense_Mutation	1	67	0	34	1	1
chr5_68293137_68293138_Frame_Shift_Ins	1	67	0	34	1	1
chr8_100706994_100706994_Missense_Mutation	1	67	0	34	1	1
chr12_132687279_132687279_Missense_Mutation	1	67	0	34	1	1
chr16_15776150_15776150_Missense_Mutation	1	67	0	34	1	1
chr17_7676003_7676004_Frame_Shift_Del	1	67	0	34	1	1
chr20_62162847_62162847_Missense_Mutation	1	67	0	34	1	1
chr2_140457493_140457493_Frame_Shift_Del	1	67	0	34	1	1
chr4_86732463_86732463_Missense_Mutation	1	67	0	34	1	1
chr11_108227858_108227858_Missense_Mutation	1	67	0	34	1	1
chr12_58888957_58888957_Missense_Mutation	1	67	0	34	1	1
chr17_7674213_7674213_Frame_Shift_Del	1	67	0	34	1	1
chr1_26775138_26775139_Missense_Mutation	1	67	0	34	1	1
chr3_52609656_52609656_Missense_Mutation	1	67	0	34	1	1
chr5_142873460_142873460_Missense_Mutation	1	67	0	34	1	1
chr7_146116899_146116899_Missense_Mutation	1	67	0	34	1	1
chr9_136496849_136496849_Missense_Mutation	1	67	0	34	1	1
chr9_136518617_136518617_Missense_Mutation	1	67	0	34	1	1
chr11_1015863_1015863_Nonsense_Mutation	1	67	0	34	1	1
chr11_118900064_118900064_Missense_Mutation	1	67	0	34	1	1
chr12_56719884_56719884_Missense_Mutation	1	67	0	34	1	1
chr12_121819596_121819596_Missense_Mutation	1	67	0	34	1	1
chr16_2046270_2046270_Missense_Mutation	1	67	0	34	1	1
chrX_48685785_48685785_Missense_Mutation	1	67	0	34	1	1
chr3_53665795_53665796_Frame_Shift_Ins	1	67	0	34	1	1
chr4_86741638_86741638_Missense_Mutation	1	67	0	34	1	1
chr5_56881907_56881907_Missense_Mutation	1	67	0	34	1	1
chr5_56887432_56887432_Missense_Mutation	1	67	0	34	1	1
chr7_75738907_75738907_Missense_Mutation	1	67	0	34	1	1
chr8_41941230_41941230_Missense_Mutation	1	67	0	34	1	1
chr9_132911034_132911034_Nonsense_Mutation	1	67	0	34	1	1
chr19_15243254_15243254_Nonsense_Mutation	1	67	0	34	1	1
chrX_101353313_101353313_Missense_Mutation	1	67	0	34	1	1
chr8_144516070_144516071_Frame_Shift_Del	1	67	0	34	1	1
chr13_27963309_27963309_Missense_Mutation	1	67	0	34	1	1
chr15_90629339_90629339_Missense_Mutation	1	67	0	34	1	1
chr16_2174296_2174296_Missense_Mutation	1	67	0	34	1	1
chrX_53193302_53193302_Missense_Mutation	1	67	0	34	1	1
chr4_186588999_186588999_Missense_Mutation	1	67	0	34	1	1
chr7_152177002_152177003_Frame_Shift_Del	1	67	0	34	1	1
chr12_70592416_70592416_Missense_Mutation	1	67	0	34	1	1
chr16_2070552_2070552_Missense_Mutation	1	67	0	34	1	1
chr10_43114716_43114716_Missense_Mutation	1	67	0	34	1	1
chr1_15932115_15932115_Nonsense_Mutation	1	67	0	34	1	1
chr3_179218295_179218295_Missense_Mutation	1	67	0	34	1	1
chr4_186619580_186619580_Missense_Mutation	1	67	0	34	1	1
chr10_121515239_121515239_Missense_Mutation	1	67	0	34	1	1
chr16_3740481_3740481_Missense_Mutation	1	67	0	34	1	1
chr19_8947620_8947620_Missense_Mutation	1	67	0	34	1	1
chr3_179234298_179234298_Missense_Mutation	1	67	0	34	1	1
chr5_56872965_56872965_Frame_Shift_Del	1	67	0	34	1	1
chr5_56882639_56882640_Frame_Shift_Ins	1	67	0	34	1	1
chr7_152250883_152250883_Nonsense_Mutation	1	67	0	34	1	1
chr14_37592035_37592035_Missense_Mutation	1	67	0	34	1	1
chr19_52190151_52190151_Missense_Mutation	1	67	0	34	1	1
chr19_54143699_54143699_Missense_Mutation	1	67	0	34	1	1
chr4_125451395_125451395_Missense_Mutation	0	68	1	33	0.3333333	1
chr9_8331642_8331642_Missense_Mutation	0	68	1	33	0.3333333	1
chr13_48380236_48380236_Frame_Shift_Del	0	68	1	33	0.3333333	1
chr1_26760869_26760869_Nonsense_Mutation	0	68	1	33	0.3333333	1
chr2_140903093_140903093_Missense_Mutation	0	68	1	33	0.3333333	1
chr3_195747250_195747250_Missense_Mutation	0	68	1	33	0.3333333	1
chr4_54267452_54267452_Missense_Mutation	0	68	1	33	0.3333333	1
chr9_121146168_121146168_Missense_Mutation	0	68	1	33	0.3333333	1
chr11_118512017_118512017_Missense_Mutation	0	68	1	33	0.3333333	1
chr16_3728468_3728468_Missense_Mutation	0	68	1	33	0.3333333	1
chr17_50199450_50199450_Missense_Mutation	0	68	1	33	0.3333333	1
chr19_8965935_8965935_Missense_Mutation	0	68	1	33	0.3333333	1
chr19_21536353_21536355_In_Frame_Del	0	68	1	33	0.3333333	1
chr19_42291330_42291330_Missense_Mutation	0	68	1	33	0.3333333	1
chr19_46920598_46920598_Missense_Mutation	0	68	1	33	0.3333333	1
chr4_105234930_105234930_Missense_Mutation	0	68	1	33	0.3333333	1
chr4_186619820_186619820_Missense_Mutation	0	68	1	33	0.3333333	1
chr13_35171413_35171413_Missense_Mutation	0	68	1	33	0.3333333	1
chr1_50970396_50970396_Missense_Mutation	0	68	1	33	0.3333333	1
chr4_87115179_87115179_Missense_Mutation	0	68	1	33	0.3333333	1
chr11_92880866_92880866_Missense_Mutation	0	68	1	33	0.3333333	1
chr12_51980942_51980968_Splice_Site	0	68	1	33	0.3333333	1
chr14_34776451_34776472_Frame_Shift_Del	0	68	1	33	0.3333333	1
chr14_99174803_99174803_Missense_Mutation	0	68	1	33	0.3333333	1
chr3_52403830_52403830_Missense_Mutation	0	68	1	33	0.3333333	1
chr3_105740528_105740540_Frame_Shift_Del	0	68	1	33	0.3333333	1
chr3_169090018_169090018_Missense_Mutation	0	68	1	33	0.3333333	1
chr6_167951511_167951521_Frame_Shift_Del	0	68	1	33	0.3333333	1
chr7_92002085_92002085_Missense_Mutation	0	68	1	33	0.3333333	1
chr15_50449433_50449440_Frame_Shift_Del	0	68	1	33	0.3333333	1
chrX_71100840_71100840_Missense_Mutation	0	68	1	33	0.3333333	1
chrX_71100849_71100849_Missense_Mutation	0	68	1	33	0.3333333	1
chr1_11144688_11144688_Missense_Mutation	0	68	1	33	0.3333333	1
chr3_138946622_138946698_Frame_Shift_Del	0	68	1	33	0.3333333	1
chr9_8499711_8499711_Missense_Mutation	0	68	1	33	0.3333333	1
chr17_31988477_31988477_Missense_Mutation	0	68	1	33	0.3333333	1
chr17_31988485_31988485_Missense_Mutation	0	68	1	33	0.3333333	1
chr19_29820818_29820818_Missense_Mutation	0	68	1	33	0.3333333	1
chr19_44757098_44757098_Missense_Mutation	0	68	1	33	0.3333333	1
chr3_52403415_52403415_Splice_Site	0	68	1	33	0.3333333	1
chr8_31640438_31640438_Missense_Mutation	0	68	1	33	0.3333333	1
chr8_112304754_112304754_Missense_Mutation	0	68	1	33	0.3333333	1
chr8_138256704_138256704_Missense_Mutation	0	68	1	33	0.3333333	1
chr11_108325500_108325539_Frame_Shift_Del	0	68	1	33	0.3333333	1
chr17_7676082_7676082_Frame_Shift_Del	0	68	1	33	0.3333333	1
chr17_43045767_43045767_Nonsense_Mutation	0	68	1	33	0.3333333	1
chrX_37009252_37009252_Missense_Mutation	0	68	1	33	0.3333333	1
chrX_45059337_45059337_Nonsense_Mutation	0	68	1	33	0.3333333	1
chrX_133699894_133699894_Splice_Site	0	68	1	33	0.3333333	1
chr1_162775672_162775672_Missense_Mutation	0	68	1	33	0.3333333	1
chr2_24037952_24037952_Missense_Mutation	0	68	1	33	0.3333333	1
chr2_36849487_36849487_Missense_Mutation	0	68	1	33	0.3333333	1
chr2_99593858_99593858_Missense_Mutation	0	68	1	33	0.3333333	1
chr4_98392044_98392045_In_Frame_Ins	0	68	1	33	0.3333333	1
chr5_1293547_1293547_Missense_Mutation	0	68	1	33	0.3333333	1
chr7_92084866_92084866_Missense_Mutation	0	68	1	33	0.3333333	1
chr11_92765015_92765015_Missense_Mutation	0	68	1	33	0.3333333	1
chr17_7670664_7670664_Nonsense_Mutation	0	68	1	33	0.3333333	1
chr22_20982458_20982458_Missense_Mutation	0	68	1	33	0.3333333	1
chr1_18703232_18703232_Missense_Mutation	0	68	1	33	0.3333333	1
chr1_197146373_197146373_Missense_Mutation	0	68	1	33	0.3333333	1
chr1_205663457_205663457_Missense_Mutation	0	68	1	33	0.3333333	1
chr2_47408509_47408509_Missense_Mutation	0	68	1	33	0.3333333	1
chr2_60461859_60461859_Missense_Mutation	0	68	1	33	0.3333333	1
chr2_212124844_212124844_Missense_Mutation	0	68	1	33	0.3333333	1
chr3_121467548_121467548_Missense_Mutation	0	68	1	33	0.3333333	1
chr4_25666153_25666153_Missense_Mutation	0	68	1	33	0.3333333	1
chr4_125316710_125316710_Missense_Mutation	0	68	1	33	0.3333333	1
chr6_149702109_149702109_Missense_Mutation	0	68	1	33	0.3333333	1
chr7_75555537_75555537_Missense_Mutation	0	68	1	33	0.3333333	1
chr7_127694867_127694867_Missense_Mutation	0	68	1	33	0.3333333	1
chr7_152176311_152176311_Missense_Mutation	0	68	1	33	0.3333333	1
chr7_157005593_157005593_Missense_Mutation	0	68	1	33	0.3333333	1
chr8_41977094_41977094_Missense_Mutation	0	68	1	33	0.3333333	1
chr9_5064911_5064911_Missense_Mutation	0	68	1	33	0.3333333	1
chr9_115086235_115086235_Missense_Mutation	0	68	1	33	0.3333333	1
chr11_57802058_57802058_Missense_Mutation	0	68	1	33	0.3333333	1
chr12_56095303_56095303_Missense_Mutation	0	68	1	33	0.3333333	1
chr12_124372206_124372206_Missense_Mutation	0	68	1	33	0.3333333	1
chr13_20006413_20006413_Missense_Mutation	0	68	1	33	0.3333333	1
chr15_50492753_50492753_Missense_Mutation	0	68	1	33	0.3333333	1
chr15_50492758_50492758_Missense_Mutation	0	68	1	33	0.3333333	1
chr15_90891000_90891000_Missense_Mutation	0	68	1	33	0.3333333	1
chr17_39792680_39792680_Missense_Mutation	0	68	1	33	0.3333333	1
chr17_59681462_59681462_Missense_Mutation	0	68	1	33	0.3333333	1
chr17_80376426_80376426_Missense_Mutation	0	68	1	33	0.3333333	1
chr19_8955201_8955201_Missense_Mutation	0	68	1	33	0.3333333	1
chr19_32915385_32915385_Missense_Mutation	0	68	1	33	0.3333333	1
chr22_41177695_41177695_Nonsense_Mutation	0	68	1	33	0.3333333	1
chr1_197090988_197090988_Missense_Mutation	0	68	1	33	0.3333333	1
chr2_32594044_32594044_Missense_Mutation	0	68	1	33	0.3333333	1
chr4_105236635_105236635_Missense_Mutation	0	68	1	33	0.3333333	1
chr6_35459725_35459725_Missense_Mutation	0	68	1	33	0.3333333	1
chr8_41661538_41661538_Missense_Mutation	0	68	1	33	0.3333333	1
chr8_112254278_112254278_Missense_Mutation	0	68	1	33	0.3333333	1
chr11_72013733_72013733_Missense_Mutation	0	68	1	33	0.3333333	1
chr11_72015738_72015747_Frame_Shift_Del	0	68	1	33	0.3333333	1
chr11_86268515_86268515_Missense_Mutation	0	68	1	33	0.3333333	1
chr18_44950541_44950541_Missense_Mutation	0	68	1	33	0.3333333	1
chr20_1937384_1937384_Missense_Mutation	0	68	1	33	0.3333333	1
chr6_55755682_55755682_Missense_Mutation	0	68	1	33	0.3333333	1
chr7_102227518_102227518_Missense_Mutation	0	68	1	33	0.3333333	1
chr11_118501688_118501688_Missense_Mutation	0	68	1	33	0.3333333	1
chr13_48452977_48453021_Splice_Site	0	68	1	33	0.3333333	1
chr17_7674292_7674292_Splice_Site	0	68	2	32	0.1089109	1
chr13_32370556_32370556_Missense_Mutation	0	68	1	33	0.3333333	1
chr17_7675088_7675088_Missense_Mutation	0	68	2	32	0.1089109	1
chr17_40354387_40354387_Missense_Mutation	0	68	1	33	0.3333333	1
chr22_20994558_20994558_Missense_Mutation	0	68	1	33	0.3333333	1
chr22_27800204_27800204_Missense_Mutation	0	68	1	33	0.3333333	1
chr7_81705401_81705401_Missense_Mutation	0	68	1	33	0.3333333	1
chr14_95090496_95090522_Nonstop_Mutation	0	68	1	33	0.3333333	1
chr1_47251511_47251511_Missense_Mutation	0	68	1	33	0.3333333	1
chr2_32481433_32481433_Missense_Mutation	0	68	1	33	0.3333333	1
chr2_42301333_42301333_Missense_Mutation	0	68	1	33	0.3333333	1
chr2_70088224_70088224_Missense_Mutation	0	68	1	33	0.3333333	1
chr3_158593421_158593421_Missense_Mutation	0	68	1	33	0.3333333	1
chr4_55089453_55089453_Missense_Mutation	0	68	1	33	0.3333333	1
chr5_56881226_56881226_Missense_Mutation	0	68	1	33	0.3333333	1
chr5_112801364_112801364_Missense_Mutation	0	68	1	33	0.3333333	1
chr6_127990774_127990774_Missense_Mutation	0	68	1	33	0.3333333	1
chr7_98935638_98935638_Missense_Mutation	0	68	1	33	0.3333333	1
chr8_31150417_31150417_Missense_Mutation	0	68	1	33	0.3333333	1
chr8_108203033_108203033_Missense_Mutation	0	68	1	33	0.3333333	1
chr8_112265554_112265554_Missense_Mutation	0	68	1	33	0.3333333	1
chr9_93292932_93292932_Missense_Mutation	0	68	1	33	0.3333333	1
chr9_121123973_121123973_Missense_Mutation	0	68	1	33	0.3333333	1
chr9_121124069_121124069_Missense_Mutation	0	68	1	33	0.3333333	1
chr11_92836566_92836566_Missense_Mutation	0	68	1	33	0.3333333	1
chr12_49042128_49042128_Missense_Mutation	0	68	1	33	0.3333333	1
chr12_56716465_56716465_Missense_Mutation	0	68	1	33	0.3333333	1
chr12_57107280_57107280_Missense_Mutation	0	68	1	33	0.3333333	1
chr13_32336642_32336642_Missense_Mutation	0	68	1	33	0.3333333	1
chr13_35161807_35161807_Missense_Mutation	0	68	1	33	0.3333333	1
chr14_95096278_95096278_Missense_Mutation	0	68	1	33	0.3333333	1
chr16_72795571_72795571_Missense_Mutation	0	68	1	33	0.3333333	1
chr17_43092412_43092412_Missense_Mutation	0	68	1	33	0.3333333	1
chr19_50407388_50407388_Missense_Mutation	0	68	1	33	0.3333333	1
chr20_51790882_51790882_Missense_Mutation	0	68	1	33	0.3333333	1
chr22_31345265_31345265_Missense_Mutation	0	68	1	33	0.3333333	1
chr22_36289123_36289123_Nonsense_Mutation	0	68	1	33	0.3333333	1
chrX_154352557_154352557_Missense_Mutation	0	68	1	33	0.3333333	1
chr7_152136925_152136925_Splice_Site	0	68	1	33	0.3333333	1
chr8_102312485_102312485_Missense_Mutation	0	68	1	33	0.3333333	1
chr8_133242051_133242052_Frame_Shift_Ins	0	68	1	33	0.3333333	1
chr12_1083319_1083319_Missense_Mutation	0	68	1	33	0.3333333	1
chr16_67611032_67611032_Missense_Mutation	0	68	1	33	0.3333333	1
chr16_89746628_89746628_Missense_Mutation	0	68	1	33	0.3333333	1
chr17_20205014_20205014_Missense_Mutation	0	68	1	33	0.3333333	1
chr17_80347685_80347685_Missense_Mutation	0	68	1	33	0.3333333	1
chr19_53577569_53577569_Missense_Mutation	0	68	1	33	0.3333333	1
chr21_34880556_34880556_Splice_Site	0	68	1	33	0.3333333	1
chr22_23825225_23825225_Missense_Mutation	0	68	1	33	0.3333333	1
chr1_26780159_26780160_Frame_Shift_Ins	0	68	1	33	0.3333333	1
chr5_68295279_68295281_In_Frame_Del	0	68	1	33	0.3333333	1
chr8_143916856_143916856_Missense_Mutation	0	68	1	33	0.3333333	1
chr17_7675175_7675175_Nonsense_Mutation	0	68	1	33	0.3333333	1
chr2_80647856_80647856_Missense_Mutation	0	68	1	33	0.3333333	1
chr3_179218286_179218286_Missense_Mutation	0	68	1	33	0.3333333	1
chr6_106099430_106099431_Frame_Shift_Ins	0	68	1	33	0.3333333	1
chr6_106099432_106099433_Nonsense_Mutation	0	68	1	33	0.3333333	1
chr7_55154026_55154026_Nonsense_Mutation	0	68	1	33	0.3333333	1
chr10_70600695_70600695_Missense_Mutation	0	68	1	33	0.3333333	1
chr17_7670685_7670685_Frame_Shift_Del	0	68	1	33	0.3333333	1
chrX_45107510_45107511_Frame_Shift_Del	0	68	1	33	0.3333333	1
chr6_138814530_138814530_Missense_Mutation	0	68	1	33	0.3333333	1
chr6_151808033_151808033_Missense_Mutation	0	68	1	33	0.3333333	1
chr7_140808041_140808041_Missense_Mutation	0	68	1	33	0.3333333	1
chr17_7675184_7675184_Missense_Mutation	0	68	1	33	0.3333333	1
chr17_35846934_35846934_Nonsense_Mutation	0	68	1	33	0.3333333	1
chr17_76736448_76736449_Missense_Mutation	0	68	1	33	0.3333333	1
chr19_8889803_8889803_Missense_Mutation	0	68	1	33	0.3333333	1
chr22_31344975_31344975_Missense_Mutation	0	68	1	33	0.3333333	1
chr1_15938770_15938784_In_Frame_Del	0	68	1	33	0.3333333	1
chr1_15938791_15938791_Missense_Mutation	0	68	1	33	0.3333333	1
chr1_26780535_26780535_Missense_Mutation	0	68	1	33	0.3333333	1
chr1_47280444_47280444_Missense_Mutation	0	68	1	33	0.3333333	1
chr1_117623678_117623678_Missense_Mutation	0	68	1	33	0.3333333	1
chr3_47017217_47017217_Frame_Shift_Del	0	68	1	33	0.3333333	1
chr9_131144301_131144301_Missense_Mutation	0	68	1	33	0.3333333	1
chr11_92355059_92355059_Missense_Mutation	0	68	1	33	0.3333333	1
chr14_92833267_92833267_Missense_Mutation	0	68	1	33	0.3333333	1
chr19_14516564_14516564_Missense_Mutation	0	68	1	33	0.3333333	1
chr19_45364253_45364282_In_Frame_Del	0	68	1	33	0.3333333	1
chrX_47175077_47175077_Missense_Mutation	0	68	1	33	0.3333333	1
chrX_71241041_71241041_Missense_Mutation	0	68	1	33	0.3333333	1
chr5_35874486_35874486_Missense_Mutation	0	68	1	33	0.3333333	1
chr12_295620_295620_Nonsense_Mutation	0	68	1	33	0.3333333	1
chr17_7673533_7673533_Splice_Site	0	68	1	33	0.3333333	1
chr1_36466799_36466799_Missense_Mutation	0	68	1	33	0.3333333	1
chr2_47839497_47839497_Missense_Mutation	0	68	1	33	0.3333333	1
chr2_136115345_136115345_Missense_Mutation	0	68	1	33	0.3333333	1
chr2_140702435_140702435_Missense_Mutation	0	68	1	33	0.3333333	1
chr2_186646809_186646809_Missense_Mutation	0	68	1	33	0.3333333	1
chr4_40121526_40121526_Missense_Mutation	0	68	1	33	0.3333333	1
chr9_132896576_132896576_Missense_Mutation	0	68	1	33	0.3333333	1
chr10_46012921_46012921_Missense_Mutation	0	68	1	33	0.3333333	1
chr12_45817681_45817681_Missense_Mutation	0	68	1	33	0.3333333	1
chr15_89323445_89323447_In_Frame_Del	0	68	1	33	0.3333333	1
chr17_50196663_50196663_Missense_Mutation	0	68	1	33	0.3333333	1
chrX_124045214_124045214_Missense_Mutation	0	68	1	33	0.3333333	1
chr7_129206527_129206527_Missense_Mutation	0	68	1	33	0.3333333	1
chrX_124030971_124030971_Missense_Mutation	0	68	1	33	0.3333333	1
chr2_188998318_188998318_Missense_Mutation	0	68	1	33	0.3333333	1
chr3_179203671_179203671_Missense_Mutation	0	68	1	33	0.3333333	1
chr5_1278693_1278693_Missense_Mutation	0	68	1	33	0.3333333	1
chr5_68280609_68280609_Missense_Mutation	0	68	1	33	0.3333333	1
chr12_57094687_57094687_Missense_Mutation	0	68	1	33	0.3333333	1
chr17_7674894_7674894_Nonsense_Mutation	0	68	1	33	0.3333333	1
chr17_59685629_59685629_Missense_Mutation	0	68	1	33	0.3333333	1
chrX_37009713_37009713_Nonsense_Mutation	0	68	1	33	0.3333333	1
chrX_53409458_53409458_Missense_Mutation	0	68	1	33	0.3333333	1
chr1_156137112_156137112_Splice_Site	0	68	1	33	0.3333333	1
chr3_10063840_10063840_Nonsense_Mutation	0	68	1	33	0.3333333	1
chr10_68644887_68644887_Missense_Mutation	0	68	1	33	0.3333333	1
chr17_7673552_7673552_Nonsense_Mutation	0	68	1	33	0.3333333	1
chr19_8943571_8943571_Missense_Mutation	0	68	1	33	0.3333333	1
chr2_24741867_24741867_Missense_Mutation	0	68	1	33	0.3333333	1
chr2_32611512_32611512_Missense_Mutation	0	68	1	33	0.3333333	1
chr1_241098707_241098707_Missense_Mutation	0	68	1	33	0.3333333	1
chr3_179203734_179203734_Missense_Mutation	0	68	1	33	0.3333333	1
chr6_156778149_156778149_Nonsense_Mutation	0	68	1	33	0.3333333	1
chr7_129212176_129212176_Missense_Mutation	0	68	1	33	0.3333333	1
chr8_41723195_41723195_Missense_Mutation	0	68	1	33	0.3333333	1
chr9_115063868_115063868_Missense_Mutation	0	68	1	33	0.3333333	1
chr10_70600428_70600429_Frame_Shift_Del	0	68	1	33	0.3333333	1
chr12_6955696_6955696_Missense_Mutation	0	68	1	33	0.3333333	1
chr12_114679563_114679563_Missense_Mutation	0	68	1	33	0.3333333	1
chr16_72793457_72793457_Missense_Mutation	0	68	1	33	0.3333333	1
chr17_31337367_31337367_Splice_Site	0	68	1	33	0.3333333	1
chr17_39530993_39530993_Missense_Mutation	0	68	1	33	0.3333333	1
chr19_46920813_46920814_Frame_Shift_Del	0	68	1	33	0.3333333	1
chrX_154364332_154364332_Missense_Mutation	0	68	1	33	0.3333333	1
chr2_96253935_96253935_Missense_Mutation	0	68	1	33	0.3333333	1
chr3_52603617_52603617_Missense_Mutation	0	68	1	33	0.3333333	1
chr3_179199156_179199156_Missense_Mutation	0	68	1	33	0.3333333	1
chr7_148815536_148815536_Missense_Mutation	0	68	1	33	0.3333333	1
chr11_46320389_46320389_Missense_Mutation	0	68	1	33	0.3333333	1
chr12_47975991_47975991_Missense_Mutation	0	68	1	33	0.3333333	1
chr12_124426700_124426700_Missense_Mutation	0	68	1	33	0.3333333	1
chr13_46127706_46127706_Missense_Mutation	0	68	1	33	0.3333333	1
chr19_10718247_10718247_Missense_Mutation	0	68	1	33	0.3333333	1
chr1_204544673_204544673_Missense_Mutation	0	68	1	33	0.3333333	1
chr2_127293551_127293551_Missense_Mutation	0	68	1	33	0.3333333	1
chr3_177053874_177053874_Missense_Mutation	0	68	1	33	0.3333333	1
chr4_1801977_1801977_Missense_Mutation	0	68	1	33	0.3333333	1
chr4_40121736_40121736_Missense_Mutation	0	68	1	33	0.3333333	1
chr5_1279457_1279457_Missense_Mutation	0	68	1	33	0.3333333	1
chr5_56859800_56859800_Missense_Mutation	0	68	1	33	0.3333333	1
chr7_27199599_27199599_Missense_Mutation	0	68	1	33	0.3333333	1
chr7_37916236_37916236_Missense_Mutation	0	68	1	33	0.3333333	1
chr15_92985630_92985630_Missense_Mutation	0	68	1	33	0.3333333	1
chr16_3770739_3770739_Missense_Mutation	0	68	1	33	0.3333333	1
chr16_11345619_11345619_Missense_Mutation	0	68	1	33	0.3333333	1
chr18_52752276_52752276_Missense_Mutation	0	68	1	33	0.3333333	1
chrX_154364071_154364071_Missense_Mutation	0	68	1	33	0.3333333	1
chr1_202013244_202013244_Nonsense_Mutation	0	68	1	33	0.3333333	1
chr3_186048662_186048662_Missense_Mutation	0	68	1	33	0.3333333	1
chr3_186048664_186048664_Missense_Mutation	0	68	1	33	0.3333333	1
chr11_3693372_3693372_Missense_Mutation	0	68	1	33	0.3333333	1
chr13_48465368_48465368_Missense_Mutation	0	68	1	33	0.3333333	1
chr16_67036699_67036699_Nonsense_Mutation	0	68	1	33	0.3333333	1
chr22_41168542_41168542_Missense_Mutation	0	68	1	33	0.3333333	1
chr1_13742038_13742038_Missense_Mutation	0	68	1	33	0.3333333	1
chr3_8990768_8990768_Missense_Mutation	0	68	1	33	0.3333333	1
chr9_121173689_121173690_Frame_Shift_Ins	0	68	1	33	0.3333333	1
chr9_136544046_136544046_Missense_Mutation	0	68	1	33	0.3333333	1
chr12_114679503_114679503_Splice_Site	0	68	1	33	0.3333333	1
chr9_8376721_8376721_Missense_Mutation	0	68	1	33	0.3333333	1
chr11_118474094_118474094_Missense_Mutation	0	68	1	33	0.3333333	1
chr9_95101763_95101763_Missense_Mutation	0	68	1	33	0.3333333	1
chr12_65066698_65066698_Missense_Mutation	0	68	1	33	0.3333333	1
chr16_15759620_15759621_Nonsense_Mutation	0	68	1	33	0.3333333	1
chr17_55320764_55320764_Missense_Mutation	0	68	1	33	0.3333333	1
chr2_25246204_25246204_Missense_Mutation	0	68	1	33	0.3333333	1
chr2_25799408_25799408_Missense_Mutation	0	68	1	33	0.3333333	1
chr3_47083895_47083895_Missense_Mutation	0	68	1	33	0.3333333	1
chr3_142562770_142562770_Missense_Mutation	0	68	1	33	0.3333333	1
chr4_105235030_105235030_Missense_Mutation	0	68	1	33	0.3333333	1
chr4_125450365_125450365_Missense_Mutation	0	68	1	33	0.3333333	1
chr4_186709436_186709436_Missense_Mutation	0	68	1	33	0.3333333	1
chr5_177211505_177211505_Missense_Mutation	0	68	1	33	0.3333333	1
chr5_180624003_180624003_Missense_Mutation	0	68	1	33	0.3333333	1
chr7_5352071_5352071_Missense_Mutation	0	68	1	33	0.3333333	1
chr7_75553503_75553503_Missense_Mutation	0	68	1	33	0.3333333	1
chr8_31081188_31081188_Missense_Mutation	0	68	1	33	0.3333333	1
chr8_32595840_32595840_Missense_Mutation	0	68	1	33	0.3333333	1
chr8_42288712_42288712_Missense_Mutation	0	68	1	33	0.3333333	1
chr8_94130944_94130944_Missense_Mutation	0	68	1	33	0.3333333	1
chr9_121098411_121098411_Missense_Mutation	0	68	1	33	0.3333333	1
chr10_68572823_68572823_Missense_Mutation	0	68	1	33	0.3333333	1
chr11_108677221_108677221_Missense_Mutation	0	68	1	33	0.3333333	1
chr12_47974193_47974193_Missense_Mutation	0	68	1	33	0.3333333	1
chr12_70609113_70609113_Missense_Mutation	0	68	1	33	0.3333333	1
chr12_122022114_122022114_Missense_Mutation	0	68	1	33	0.3333333	1
chr12_124341916_124341916_Missense_Mutation	0	68	1	33	0.3333333	1
chr12_124372487_124372487_Missense_Mutation	0	68	1	33	0.3333333	1
chr14_50757699_50757699_Missense_Mutation	0	68	1	33	0.3333333	1
chr16_89816599_89816599_Missense_Mutation	0	68	1	33	0.3333333	1
chr17_80298494_80298494_Missense_Mutation	0	68	1	33	0.3333333	1
chr17_80325126_80325126_Missense_Mutation	0	68	1	33	0.3333333	1
chr19_8946265_8946265_Missense_Mutation	0	68	1	33	0.3333333	1
chr19_8951739_8951739_Missense_Mutation	0	68	1	33	0.3333333	1
chr19_8963589_8963589_Missense_Mutation	0	68	1	33	0.3333333	1
chr19_8972467_8972467_Missense_Mutation	0	68	1	33	0.3333333	1
chr19_8972498_8972498_Missense_Mutation	0	68	1	33	0.3333333	1
chrX_108733710_108733710_Missense_Mutation	0	68	1	33	0.3333333	1
chrX_126165484_126165484_Missense_Mutation	0	68	1	33	0.3333333	1
chr1_15938736_15938736_Missense_Mutation	0	68	1	33	0.3333333	1
chr5_150077396_150077396_Missense_Mutation	0	68	1	33	0.3333333	1
chr8_138151320_138151320_Missense_Mutation	0	68	1	33	0.3333333	1
chr10_89008942_89008946_Frame_Shift_Del	0	68	1	33	0.3333333	1
chr12_45837609_45837609_Missense_Mutation	0	68	1	33	0.3333333	1
chr17_7675095_7675095_Missense_Mutation	0	68	1	33	0.3333333	1
chr17_39727526_39727526_Missense_Mutation	0	68	1	33	0.3333333	1
chrX_108734154_108734154_Missense_Mutation	0	68	1	33	0.3333333	1
